# Supplementary material for: Patients’ experiences regarding self-monitoring of the disease course: an observational pilot study in patients with inflammatory rheumatic diseases at a rheumatology outpatient clinic in The Netherlands
Source: PubMed Central journal article supplement — BMJ Open. 2020 Aug 20;10(8):e033321. doi: 10.1136/bmjopen-2019-033321 (PMC7440711; doi:10.1136/bmjopen-2019-033321), 2020-08-20
Supplement: bmjopen-2019-033321.draft_revisions.pdf [file bmjopen-2019-033321.draft_revisions.pdf]

# BMJ Open

BMJ Open is committed to open peer review. As part of this commitment we make the peer review history of every article we publish publicly available.

When an article is published we post the peer reviewers' comments and the authors' responses online. We also post the versions of the paper that were used during peer review. These are the versions that the peer review comments apply to.

The versions of the paper that follow are the versions that were submitted during the peer review process. They are not the versions of record or the final published versions. They should not be cited or distributed as the published version of this manuscript.

BMJ Open is an open access journal and the full, final, typeset and author-corrected version of record of the manuscript is available on our site with no access controls, subscription charges or pay-per-view fees (<http://bmjopen.bmj.com>).

If you have any questions on BMJ Open's open peer review process please email [info.bmjopen@bmj.com](mailto:info.bmjopen@bmj.com)

# BMJ Open

## Influencing Factors Regarding Self-monitoring in Patients with Inflammatory Rheumatic Diseases

|                               |                                                                                                                                                                                                                                                                                            |
|-------------------------------|--------------------------------------------------------------------------------------------------------------------------------------------------------------------------------------------------------------------------------------------------------------------------------------------|
| Journal:                      | <i>BMJ Open</i>                                                                                                                                                                                                                                                                            |
| Manuscript ID                 | bmjopen-2019-033321                                                                                                                                                                                                                                                                        |
| Article Type:                 | Research                                                                                                                                                                                                                                                                                   |
| Date Submitted by the Author: | 31-Jul-2019                                                                                                                                                                                                                                                                                |
| Complete List of Authors:     | Renskers, Lisanne; Radboudumc, IQ healthcare<br>Rongen-van Dartel, Sanne; Radboudumc, IQ healthcare; Bernhoven Hospital Location Uden, Rheumatology<br>Huis, Anita; Radboudumc, IQ healthcare<br>van riel, piet; Radboudumc, IQ healthcare; Bernhoven Hospital Location Uden, Rheumatology |
| Keywords:                     | RHEUMATOLOGY, QUALITATIVE RESEARCH, EDUCATION & TRAINING (see Medical Education & Training)                                                                                                                                                                                                |
|                               |                                                                                                                                                                                                                                                                                            |

SCHOLARONE™  
Manuscripts

L. Renskers, S.A.A. Rongen-van Dartel, A.M.P. Huis, and P.L.C.M. van Riel

1  
2  
3 **1 Full title**

4  
5 2 Influencing Factors Regarding Self-monitoring in Patients with Inflammatory Rheumatic Diseases

6  
7 3  
8 **4 Author names and ORCID ID numbers**

9  
10 5 Lianne Renskers (0000-0003-1413-1629)

11 6 Sanne Annemarie Adriane Rongen-van Dartel (0000-0002-2536-0024)

12 7 Anna Maria Petronella Huis (0000-0003-1144-163X)

13 8 Petrus Leonardus Cornelis Maria van Riel (0000-0001-7719-8906)

14  
15 9  
16  
17  
18 **10 Keywords**

19  
20 11 Rheumatoid Arthritis; Spondyloarthritis; Patient Perspective; Psoriatic Arthritis; Qualitative research

21  
22 12  
23 **13 Institution**

24 14 Radboud university medical center, Radboud Institute for Health Sciences

25 15 IQ healthcare

26 16 Geert Grooteplein 21

27 17 PO Box 9101 (114)

28 18 6500 HB Nijmegen

29 19 The Netherlands

30 20 Telephone number: (0031) 24 36 15305

31  
32  
33  
34  
35  
36  
37  
38 **22 Author affiliations**

39  
40 23 L. Renskers<sup>1</sup>, MSc., S.A.A. Rongen- van Dartel<sup>1,2</sup>, PhD., A.M.P. Huis<sup>1</sup>, PhD., P.L.C.M. van Riel<sup>1,2</sup>, MD,  
41 24 PhD.

42  
43 25 <sup>1</sup>Radboud university medical center, Radboud Institute for Health Sciences, IQ healthcare, Nijmegen,  
44 26 the Netherlands, <sup>2</sup>Bernhoven, Department of Rheumatology, Uden

45  
46  
47  
48  
49 **28 Corresponding author**

50 29 Lianne Renskers, MSc.

51 30 Radboud university medical center

52 31 Scientific Center for Quality of Healthcare (IQ healthcare)

53 32 PO Box 9101 (114)

54 33 6500 HB Nijmegen, The Netherlands

55 34 Telephone number: (0031) 24 36 10329 – E-mail address: [lianne.renkers@radboudumc.nl](mailto:lianne.renkers@radboudumc.nl)

L. Renskers, S.A.A. Rongen-van Dartel, A.M.P. Huis, and P.L.C.M. van Riel

1  
2  
3 **Abstract**  
4

5 36 Objectives. Self-monitoring is a relatively new concept in the management of patients with  
6  
7 37 Inflammatory Rheumatic Diseases (IRDs), which can be done by patients by completing Patient-  
8  
9 38 Reported Outcome Measures (PROMs). The aim of this pilot study was to obtain patients' experiences  
10  
11 39 with online self-monitoring and to assess information about adherence to reminder emails and  
12  
13 40 correlations between the PROMs and the Disease Activity Score 28 (DAS28).  
14  
15

16 41  
17  
18 42 Methods. We used an online self-monitoring program in which patients completed disease-specific  
19  
20 43 PROMs in-between their outpatient consultations. Facilitators and barriers regarding self-monitoring  
21  
22 44 were qualitatively assessed through a focus group discussion and telephone interviews. Adherence  
23  
24 45 and correlations were quantitatively assessed.  
25  
26  
27  
28  
29

30 47 Results. Forty-seven patients participated and three themes were identified: knowledge about and  
31  
32 48 insight into disease (activity), patient-professional interaction, and functionality of the program.  
33  
34 49 Patients explained that they gained more knowledge about their disease, felt less dependent on their  
35  
36 50 healthcare professional, and valued the insight into their long-term disease course. Barriers were  
37  
38 51 mostly related to technical factors. Mean adherence to the PROM reminder emails was 68.1%.  
39  
40 52 Rheumatoid Arthritis Impact of Disease (RAID) showed the best congruence with DAS28 scores. Mean  
41  
42 53 participation time was 350 days.  
43  
44  
45  
46  
47

48 55 Conclusion. This pilot study shows the potential of self-monitoring being a part of personalized  
49  
50 56 healthcare. Patients were predominantly positive about the concept of self-monitoring. Self-  
51  
52 57 monitoring has the potential to contribute to a more efficient allocation of outpatient consultations.  
53  
54 58 Further research will however be needed to determine the cost-effectiveness of self-monitoring.  
55  
56  
57  
58  
59  
60

L. Renskers, S.A.A. Rongen-van Dartel, A.M.P. Huis, and P.L.C.M. van Riel

1  
2  
3 59 **Article summary**  
4  
5 60  
6  
7 61 Strengths and limitations of this study:  
8  
9  
10 62

- 11  
12 63 • This study provides a thorough understanding of the influencing factors regarding self-  
13  
14 64 monitoring, which was explored by both qualitative and quantitative research methods  
15  
16 65 • Patients were positive about the concept of self-monitoring and gave valuable comments for  
17  
18 66 further development of the self-monitoring program  
19  
20 67 • Because of the small study population, it is not clear which percentage of the total IRD  
21  
22 68 population is able and willing to participate in self-monitoring activities  
23  
24  
25 69 • It remains unclear if our self-monitoring program can contribute to reductions in outpatient  
26  
27  
28 70 consultations  
29  
30  
31  
32  
33  
34  
35  
36  
37  
38  
39  
40  
41  
42  
43  
44  
45  
46  
47  
48  
49  
50  
51  
52  
53  
54  
55  
56  
57  
58  
59  
60

L. Renskers, S.A.A. Rongen-van Dartel, A.M.P. Huis, and P.L.C.M. van Riel

## 71 **Introduction**

72 In chronic care, there is a tendency toward personalized healthcare. Patients have become more  
73 empowered and are increasingly involved in the planning and development of healthcare.<sup>1,2</sup> There is a  
74 shift from a paternalistic model (in which the doctor is dominant and believes that patients need to be  
75 guided through the decision making process) to a shared-decision making model (in which doctor and  
76 patient make mutual, collaborative decisions). This shift requires an engaged patient who takes  
77 responsibilities regarding day-to-day disease management.<sup>3-6</sup> As a result of this shift, new roles for  
78 both patients and healthcare professionals (HCPs) have arisen. An example of what this new role  
79 entails for a patient is self-monitoring, in which a patient undertakes self-measurement of vital signs,  
80 symptoms, behavior, or psychological well-being through Patient-Reported Outcome Measures  
81 (PROMs).<sup>7,8</sup> In some patients with Inflammatory Rheumatic Diseases (IRDs) such as Rheumatoid  
82 Arthritis (RA), Psoriatic Arthritis (PsA), or Ankylosing Spondylitis (AS), self-monitoring can gradually  
83 replace the traditional monitoring by HCPs.<sup>9</sup>

84 There are however also other reasons why self-management in patients with IRD has gained  
85 more interest. Usual care in patients with IRDs is primarily aimed at suppressing disease activity, in  
86 order to prevent structural damage.<sup>10,11</sup> The Treat-to-Target Task Force recommends rheumatologists  
87 to monthly assess patients with moderate or high disease activity, and patients with controlled and  
88 low disease activity every three to six months.<sup>12</sup> In practice, however, these frequencies are not always  
89 met for various reasons. This strategy causes time constraints and a growing workload among  
90 rheumatologists, making it not manageable for all rheumatologists to comply fully to the frequent  
91 assessments.<sup>13</sup> Another reason is connected to the aging population. The number and proportion of  
92 patients with IRDs aged 65 and over will increase in the near future.<sup>14</sup> Self-monitoring could prove to  
93 be a solution in diminishing the number of consultations.<sup>15</sup> As disease activity can only be objectively  
94 assessed during outpatient consultations, it remains unclear what happens with the disease activity  
95 in-between consultations. Fluctuations and peaks in disease activity are easily missed or they remain  
96 unnoticed, which could have disastrous consequences regarding joint damage.<sup>10</sup> Self-monitoring might

L. Renskers, S.A.A. Rongen-van Dartel, A.M.P. Huis, and P.L.C.M. van Riel

1  
2  
3 97 give a better insight into these fluctuations of the disease activity in-between outpatient clinical  
4  
5 98 consultations. Moreover, some patients visit their rheumatologist while their disease activity is under  
6  
7 99 control, thereby contributing to unnecessary outpatient consultations. Summarizing, self-monitoring  
8  
9  
10 100 in IRDs as a first step toward personalized healthcare enables patients as well as HCPs to get insight  
11  
12 101 into the disease activity course over time. Moreover, it may lead to a more consistent reporting in the  
13  
14 102 long term and may contribute to optimizing the number, timing, and efficiency of consultations.<sup>9 15</sup> By  
15  
16 103 completing PROMs, patients who need further medical attention can be identified and receive  
17  
18 104 additional medical attention. Moreover, completion of a PROM will help a patient to prepare for a visit  
19  
20  
21 105 and it could improve the communication between physician and patient.<sup>16</sup>  
22

23 106 In the present study, an online self-monitoring program was pilot-tested. The aim of this study  
24  
25 107 was twofold. Firstly, this study aimed to obtain experiences (facilitating factors and barriers) regarding  
26  
27 108 online remote monitoring in patients with IRDs. Secondly, information about adherence to PROM  
28  
29 109 reminder emails and correlations between the PROMs and the Disease Activity Score 28 (DAS28) were  
30  
31  
32 110 assessed.  
33  
34  
35  
36  
37  
38  
39  
40  
41  
42  
43  
44  
45  
46  
47  
48  
49  
50  
51  
52  
53  
54  
55  
56  
57  
58  
59  
60

L. Renskers, S.A.A. Rongen-van Dartel, A.M.P. Huis, and P.L.C.M. van Riel

## 111 **Methods**

### 112 *Study design*

113 This study was conducted at a teaching hospital in Uden (the Netherlands) at the rheumatology  
114 outpatient clinic from 6 July 2015 until 9 May 2017.

### 116 *Study participants*

117 In order to be eligible for this study, patients had to be diagnosed with an IRD according to the  
118 ACR/EULAR criteria.<sup>17</sup> Other criteria included having an electronic device (laptop/PC, tablet or  
119 Smartphone) with access to the Internet, and being able to sufficiently read and write Dutch. Patient  
120 inclusion started in July 2015 and we included the last patient in October 2016.

### 122 *Follow-up duration*

123 Patients were able to withdraw from the program at any time point. We defined early study  
124 termination in two manners: when a patient reported to withdraw from the self-monitoring program,  
125 this was evaluated as the end date. Some patients did not report dropping out of the study but did  
126 stop completing PROM(s). End of study was set by adding the interval time to the date the last PROM  
127 was filled in. For example, a patient with a four-week PROM frequency (28 days) completed the last  
128 PROM on 1 March 2017. For this patient, end of study date was set on 29 March 2017.

### 130 *Self-monitoring program*

131 iMonitor, the online self-monitoring program tested in this study, was developed by Pfizer.<sup>18</sup> The  
132 program was accessible through a laptop, tablet or Smartphone by filling in a user name, password,  
133 and pin code. The program complied with the required privacy standards. The system generated an  
134 email-alert for filling in a PROM (or PROMs) at a frequency (one-, two-, six- or eight-weekly) which was  
135 selected in advance by the patient. Patients were given 24 hours to complete one or more PROMs.  
136 Available PROMs for patients with RA were the following: Health Assessment Questionnaire (HAQ),



L. Renskers, S.A.A. Rongen-van Dartel, A.M.P. Huis, and P.L.C.M. van Riel

1  
2  
3 137 Rheumatoid Arthritis Impact of Disease (RAID), and/or Rheumatoid Arthritis Disease Activity Index-5  
4  
5 138 (RADAI-5). Patients with Spondylarthropathies (SpA) could fill in the HAQ, the Bath Ankylosing  
6  
7 139 Spondylitis Disease Activity Index (BASDAI) and/or Bath Ankylosing Spondylitis Functional Index  
8  
9 140 (BASFI). Patients could opt to assess one to three PROMs. Completion of all PROMs took about 5  
10  
11 141 minutes. After completion, the PROM scores were subsequently displayed in a graph. Additionally,  
12  
13 142 DAS28 scores could be added to the graph by the HCP. iMonitor was accessible to both patients and  
14  
15 143 HCPs.  
16  
17  
18  
19  
20

#### 21 145 *Procedure*

22  
23 146 Patients were informed about this pilot study and recruited in several ways. Firstly, we used purposive  
24  
25 147 sampling: rheumatologists themselves asked patients to participate during outpatient consultations.  
26  
27 148 Secondly, during general information meetings at the hospital, patients were informed about the study  
28  
29 149 and were able to sign up. Lastly, leaflets about the study were available in the waiting room and  
30  
31 150 patients were informed about the study through the hospital's website. Patients received a manual  
32  
33 151 containing information regarding access to and use of the program. However, a substantial number  
34  
35 152 needed additional training, which was provided by instruction classes. After patients had been  
36  
37 153 instructed how to use the program, they could indicate which PROM(s) they preferred to fill in by  
38  
39 154 showing them the paper versions. Moreover, they were asked to indicate their desired frequency  
40  
41 155 option. Patients who agreed to take part in the study were asked to sign a consent form.  
42  
43  
44  
45  
46  
47

#### 48 157 *Data collection and analysis*

##### 49 158 Quantitative

- 50  
51  
52 159     ▪ Adherence and congruence

53  
54 160 The study aims for the quantitative part of this study were twofold. Firstly, we determined adherence  
55  
56 161 to the alert-emails. This was done by assessing whether a patient had completed (yes or no) the  
57  
58 162 PROM(s) in the predetermined time interval. Adherence was calculated as the number of completed  
59  
60

L. Renskers, S.A.A. Rongen-van Dartel, A.M.P. Huis, and P.L.C.M. van Riel

1  
2  
3 163 assessments by the patient divided by the number of assessments that should have been assessed  
4  
5 164 according to the chosen interval of the patient times 100%. Patients who only completed a PROM(s)  
6  
7 165 once were excluded in this adherence analysis. Secondly, we determined the congruence between  
8  
9 166 DAS28 scores and PROM values. Two researchers (LR and PvR) independently assessed congruence by  
10  
11 167 comparing the DAS28 course with the corresponding PROM-value(s) using two categories (poor and  
12  
13 168 good) and discussed discrepancies. Data from patients with at least three PROM values (falling within  
14  
15 169 a fourteen-day-window with DAS28 assessment) were assessed.  
16  
17  
18  
19  
20

#### 21 171 Qualitative

22  
23 172 Patient experiences with the self-monitoring program were obtained via a focus group and semi-  
24  
25 173 structured interviews. The purpose of the focus group and interviews was to gain insight into the  
26  
27 174 barriers and facilitators encountered by patients. The framework from Flottorp et al.<sup>19</sup> served as an  
28  
29 175 inspiration for a semi-structured topic guide. This framework identifies factors that might hinder or  
30  
31 176 facilitate the implementation of innovations. For this study we used the framework to identify  
32  
33 177 facilitating factors and barriers regarding online remote monitoring. Prior to the start of the focus  
34  
35 178 group discussion we conducted a telephone interview with one patient to check the appropriateness  
36  
37 179 of the topic guide and to check whether the questions were clear. During the focus group discussion,  
38  
39 180 an experienced moderator (PvR) guided the discussion. Patients unable to attend the focus group were  
40  
41 181 interviewed by telephone, using the same topic guide. All participating patients had at least six months  
42  
43 182 experience with the self-monitoring program. The interviews and focus group discussion were  
44  
45 183 recorded and transcribed ad verbum, while two researchers independently coded the transcripts. A  
46  
47 184 constant comparative method was used for the analysis of the emerging themes. We conducted coding  
48  
49 185 and analysis by using a qualitative software program (Atlas.ti).  
50  
51  
52  
53  
54  
55  
56  
57  
58  
59  
60

L. Renskers, S.A.A. Rongen-van Dartel, A.M.P. Huis, and P.L.C.M. van Riel

186 *Patient and public involvement*

187 Firstly, patient involvement was needed during the establishment of the topic guide, which was pre-  
188 tested among one patient in order to check if the questions were comprehensible and clear. Secondly,  
189 patients were encouraged to give suggestions and comments regarding the use of the program during  
190 the entire study period. This feedback was used as input for the implementation of a revised version  
191 of the program at a later stage. Lastly, the study participants exchanged their experiences with the  
192 self-monitoring program with other patients (users and non-users) during research meetings at the  
193 hospital.

194

195 **Results**

196 *Study population*

197 In this pilot study, slightly more women than men participated (n=27; 57.4%). Mean( $\pm$ ) age was  
198 57.3(10.7) years. Most patients (n=38) were diagnosed with RA (80.9%), while nine patients were  
199 diagnosed with a SpA (eight patients with PsA, and one patient with AS). Other baseline characteristics  
200 are given in Table 1. During the study period we included 47 patients. Patient inclusion started in July  
201 2015 and we included the last patient in October 2016. Two patients eventually signed the informed  
202 consent form but did not complete any PROMs and were withdrawn from the study. An overview of  
203 the follow-up duration is presented in Figure 1. In total, twenty-three patients participated from the  
204 start (different start dates were possible) until the end of the study (48.9%). The follow-up duration of  
205 the 45 patients who completed PROMs varied between 14 and 597 days, with a mean of 350 days.

206

207 < Figure 1. Overview of the follow-up duration of the 47 iMonitor participants >

L. Renskers, S.A.A. Rongen-van Dartel, A.M.P. Huis, and P.L.C.M. van Riel

208 Table 1. Baseline characteristics of the 47 patients using the self-monitoring program

209

| Characteristics                                | Rheumatoid arthritis, n = 38 | SpA group, n = 9        |
|------------------------------------------------|------------------------------|-------------------------|
| Patient and disease characteristics            |                              |                         |
| Age, years, mean (SD)                          | 57.74 (11.17)                | 55.67 (8.69)            |
| Female, n (%)                                  | 20 (52.6%)                   | 7 (77.8%)               |
| Disease duration, years, mean (SD)             | 8.08 (4.74)                  | 9.89 (7.25)             |
| DAS28-score, mean (SD)                         | 3.19 (1.25)                  | n.a.                    |
| Educational level                              |                              |                         |
| Low, n (%)                                     | 12 (34.3)                    | 3 (37.5)                |
| Middle, n (%)                                  | 11 (31.4)                    | 3 (37.5)                |
| High, n (%)                                    | 12 (34.3)                    | 2 (25.0)                |
| Baseline PROM-values                           |                              |                         |
| HAQ [0.00-3.00] (n=27), mean, SD, range        | 0.78 (0.61) [0.00;2.38]      | 0.98 (0.60) [0.13;1.88] |
| RADAI-5 [0.00 – 10.00] (n=24), mean, SD, range | 3.49 (2.32) [0.00;7.40]      | n.a.                    |
| RAID [0.00 – 10.00] (n=35) mean, SD, range     | 3.47 (2.28) [0.00;7.61]      | n.a.                    |

L. Renskers, S.A.A. Rongen-van Dartel, A.M.P. Huis, and P.L.C.M. van Riel

|                                       |      |      |
|---------------------------------------|------|------|
| BASFI [0.00 – 10.00] (n=1), mean, SD  | n.a. | 5.05 |
| BASDAI [0.00 – 10.00] (n=1), mean, SD | n.a. | 4.60 |

210 *SpA: Spondylarthropathy; PROM: Patient-Reported Outcome Measure; HAQ: Health Assessment Questionnaire (3 = severe disability); RADAI-5: Rheumatoid Arthritis Disease*  
211 *Activity Index-5 (10 = severe disease activity); RAID: Rheumatoid Arthritis Impact of Disease (10 = severe impact of disease activity); BASFI: Bath Ankylosing Spondylitis*  
212 *Functional Index (10 = severe functional limitation); BASDAI: Bath Ankylosing Spondylitis Disease Activity Index (10 = severe disease activity)*

For peer review only

L. Renskers, S.A.A. Rongen-van Dartel, A.M.P. Huis, and P.L.C.M. van Riel

213 *Quantitative*

214     ▪ Adherence and congruence

215 Twenty-seven patients (57.4%) were able to use the self-monitoring program without additional  
 216 training, whereas twenty patients (42.6%) attended the instruction classes. With regard to the PROM  
 217 preferences, RAID was chosen most often, namely 34 times. HAQ and RADAI-5 were chosen 27 and 23  
 218 times, respectively. Seventeen patients chose to complete one PROM, 21 patients chose to complete  
 219 two PROMs, and nine patients chose to complete three PROMs. Mean adherence to reminder emails  
 220 was 68.1%, see table 2. With regard to the congruence between the DAS28 score and PROM values,  
 221 RAID scored best (from 25 assessments, 17 times a score of 'good', 68.0%). RADAI-5, on the other  
 222 hand, scored 'good' in ten out of seventeen assessments (58.8%), see table 3. Figure 2 shows two  
 223 examples of assessments regarding the congruence between the PROMs and DAS28 scores.

224  
 225 Table 2. Data regarding PROM frequency, PROM scores, and adherences rates, n = 47

| Item                                           | n (%)      |
|------------------------------------------------|------------|
| PROM frequency                                 |            |
| 1 week                                         | 4 (8.5)    |
| 2 weeks                                        | 10 (21.3)  |
| 4 weeks                                        | 31 (66.0)  |
| ≥ 6 weeks                                      | 2 (4.3)    |
| Number of PROMs to complete, chosen by patient |            |
| One                                            | 17 (36.17) |
| Two                                            | 21(44.68)  |
| Three                                          | 9 (19.15)  |
| Mean adherence (%) to PROM reminders           | 68.1%      |

226 *PROM: Patient-Reported Outcome Measure; Adherence: calculated as person time frequency: dividing the*  
 227 *number of completed PROMs by the number of PROM-assessments that should have been completed according*  
 228 *to the chosen PROM frequency, times 100*

229  
 230 < Figure 2. Example of a positive (above) and negative (below) rating regarding the PROM-DAS28  
 231 congruence >

L. Renskers, S.A.A. Rongen-van Dartel, A.M.P. Huis, and P.L.C.M. van Riel

232 Table 3. Congruence (poor or good) between DAS28 scores and RAID and RADAI-5, assessed in n = 33  
233 patients

| PROM    | Poor      | Good       | Total |
|---------|-----------|------------|-------|
| RAID    | 8 (32.0%) | 17 (68.0%) | 25    |
| RADAI-5 | 7 (41.2%) | 10 (58.8%) | 17    |

234 *PROM: Patient-Reported Outcome Measure; RAID: Rheumatoid Arthritis Impact of Disease; RADAI-5:*

235 *Rheumatoid Arthritis Disease Activity Index-5*

236

237 *Qualitative*

238 We conducted the focus group discussion and telephone interviews between December 2016 and June  
239 2017. The interviews lasted between 24 and 42 minutes, while the focus group discussion lasted one  
240 hour and 22 minutes. Six patients attended the focus group discussion, and four patients participated  
241 in a telephone interview (five female and five male patients).

242

243 *Influencing factors regarding the self-monitoring program*

244 Three main themes emerged from the focus group discussion and interviews: knowledge about and  
245 insight into disease (activity), patient-professional interaction, and functionality of the program. Five  
246 subcategories emerged: Disease (self)management, discussing results with healthcare professionals,  
247 technical factors, user interface and PROMs, and patients' suggestions for improvement. Table 4  
248 provides an overview of the themes and subcategories regarding the qualitative analysis.

249

250

L. Renskers, S.A.A. Rongen-van Dartel, A.M.P. Huis, and P.L.C.M. van Riel

251 Table 4. Themes and subcategories with regard to the qualitative analysis of barriers and facilitators  
 252 using iMonitor

| Theme                                               | Subcategory                                                                                  |
|-----------------------------------------------------|----------------------------------------------------------------------------------------------|
| Knowledge about and insight into disease (activity) | n.a.                                                                                         |
| Patient-professional interactions                   | - Disease (self)management<br>- Discussing results with healthcare professionals             |
| Functionality of the program                        | - Technical factors<br>- User interface and PROMs<br>- Patients' suggestions for improvement |

253 *Three main themes and five subcategories emerged from the qualitative analysis. The framework from Flottorp*  
 254 *et al.<sup>19</sup> served as a guide for the establishment of the topic guide*

255

256 *Theme I: Knowledge about and insight into disease (activity)*

257 The most cited reason for using the self-monitoring program was that patients gained insight into their  
 258 (long-term) disease activity course. Most patients indicated that using the program led to more  
 259 knowledge and awareness about their disease. Some patients reported that they recognized peaks in  
 260 disease activity earlier and could subsequently prepare for an exacerbation. Patients also mentioned  
 261 that they became more prudent when noticing a flare. When asked more specifically about patients'  
 262 experiences with the congruence between their PROM values and DAS28 scores, most patients  
 263 thought their PROM values were in line with their DAS28.

264 *“By consciously using the program, it was easier to find things about rheumatism and to gain more*  
 265 *insight into the question ‘What is rheumatism?’”*



L. Renskers, S.A.A. Rongen-van Dartel, A.M.P. Huis, and P.L.C.M. van Riel

266 *Theme II: Patient-professional interactions*

267     ▪ Disease (self)management

268 By using the self-monitoring program, most patients felt less dependent on their HCP. Patients  
269 appreciated the fact that they were able to influence their own disease management. Overall, patients  
270 thought that the self-monitoring program could contribute to a reduction in the number of outpatient  
271 consultations.

272  
273 *“I can monitor my disease course, keep record of my disease activity in-between consultations, without  
274 being dependent on the professional”*

275

276     ▪ Discussing results with healthcare professionals

277 Patients emphasized the importance of discussing the results of online monitoring (e.g. PROM values)  
278 with their HCP (rheumatologist or nurse). Most of all, they wanted to know if they were ‘doing it right’.  
279 Some patients expressed the value of discussing their results with their HCP. One patient provided the  
280 following scenario: ‘I used to look at the back of a computer screen during an outpatient visit. Now, I’m  
281 looking at the computer screen together with my HCP, sharing and discussing the PROM values and our  
282 ideas about my treatment’. Patients who did not discuss their values felt the need to do so in the  
283 future.

284

285 *Theme III: Functionality of the program*

286     ▪ Technical factors

287 Barriers regarding the use of the self-monitoring program were mostly related to technical aspects.  
288 Some patients had problems with the login system, which hindered them from accessing the website.  
289 Regarding the PROM reminder emails: the system generated an email alert at fixed time points (e.g.  
290 four-weekly). Some patients noticed that the system generated an alert at unfortunate time points or  
291 even no alert at all.

L. Renskers, S.A.A. Rongen-van Dartel, A.M.P. Huis, and P.L.C.M. van Riel

292       ▪ User interface and PROMs

293 Twenty-seven patients joined the instruction classes, which were perceived to be very helpful. Overall,  
294 patients were satisfied with the user interface of the program. They reviewed the layout as clear and  
295 comprehensible. Some patients experienced difficulties with the content and layout of the PROMs. For  
296 example, some patients thought the questions were not specific enough. Furthermore, the program  
297 did not use a progress bar and there was no 'Accomplish' sign after completing a PROM. As a result –  
298 in case of completing more than one PROM – some patients did not know how many PROMs they had  
299 actually completed.

301       ▪ Patients' suggestions for improvement

302 Most commonly mentioned suggestions concerned adjustments to clarify PROM values, for example  
303 a textbox to type a comment in case of an exacerbation. Additionally, patients provided suggestions  
304 concerning the possibility of also having access to their lab values in the self-monitoring program, as  
305 well as the possibility of having a more detailed look at a certain time period.

L. Renskers, S.A.A. Rongen-van Dartel, A.M.P. Huis, and P.L.C.M. van Riel

1  
2  
3 306 **Discussion**  
4

5 307 This study collected experiences from patients with IRDs regarding online self-monitoring. Moreover,  
6  
7 308 we assessed adherence to the predefined PROM frequency to measure disease activity and the  
8  
9 309 congruence between the PROMs and the DAS28. The qualitative analysis revealed three themes:  
10  
11 310 knowledge about and insight into disease (activity), patient-professional interaction, and functionality  
12  
13 311 of the program. Overall, patients were mainly positive about the program and were willing to continue.  
14  
15 312 Most of them participated for an extended period: mean follow-up duration was almost one year, and  
16  
17 313 mean adherence to the predefined PROM frequency was 68.1%. Patients reported that they gained  
18  
19 314 more knowledge about their disease and felt less dependent on their HCP.  
20  
21  
22

23 315  
24  
25 316 By self-monitoring disease activity, patients obtained a graphic overview of their PROM values over  
26  
27 317 time, which gave them insight into their disease course. Patients reported that they appreciated both  
28  
29 318 this long-term insight into their disease pattern, and the ability to anticipate on an exacerbation. They  
30  
31 319 also indicated that they gained more knowledge about their disease, they felt better prepared for a  
32  
33 320 consultation, and felt less dependent on their HCP in handling their disease. Literature about self-  
34  
35 321 monitoring in diabetes already showed that knowledge about the disease and self-monitoring are  
36  
37 322 related<sup>8</sup>. Although some knowledge is a prerequisite for self-monitoring, the process of self-monitoring  
38  
39 323 contributes to the further expansion of disease-related knowledge. Adequate disease-related  
40  
41 324 knowledge is important, since it may influence patients' decisions regarding treatment, compliance,  
42  
43 325 and self-management performance,<sup>20</sup> as well as the ability to recognize signs, symptoms, and  
44  
45 326 patterns.<sup>8</sup> All of these aspects are essential in shared-decision making,<sup>21</sup> while also being beneficial to  
46  
47 327 the efficiency of consultations. From the perspective of the HCP, it is important to give feedback to the  
48  
49 328 patients about the results of self-monitoring, a fact that was emphasized by our study participants  
50  
51 329 during the interviews. Those who had not received feedback about their PROM-values and/or disease  
52  
53 330 activity course were less motivated to continue with the program. The importance of feedback was  
54  
55 331 emphasized in a study in which patients with early rheumatoid arthritis received visual feedback by  
56  
57  
58  
59  
60

L. Renskers, S.A.A. Rongen-van Dartel, A.M.P. Huis, and P.L.C.M. van Riel

332 their HCP about their disease progression. Compared to patients who received standard care, patients  
333 who received feedback showed significant differences regarding disease activity parameters.<sup>22</sup>  
334 Obtaining insight into the long-term disease activity course, and being able to anticipate on an  
335 exacerbation, might benefit the effectiveness of the delivered care as well. Patients will be able to  
336 respond to a deterioration in a timely manner and will have a greater chance to receive the care they  
337 need at the right time, resulting in a decrease of the cumulative disease activity. On the other hand,  
338 fewer consultations are possible if the disease activity is stable, which will eventually lead to less  
339 frequent outpatient visits. Studies on self-monitoring in other chronic diseases have already proven its  
340 effectiveness, such as better control of blood glucose levels in diabetes,<sup>23,24</sup> reduction in mortality rates  
341 in heart failure,<sup>25 26</sup> reductions in blood pressure in hypertension,<sup>27 28</sup> and reductions in  
342 thromboembolic events in patients using anticoagulation therapy.<sup>29</sup> The effectiveness of self-  
343 monitoring resulted in a reduction in hospital readmissions in patients with hypertension, COPD and  
344 heart failure.<sup>30</sup> Patients in our study believed that self-monitoring could lead to a reduction in  
345 consultations, although they stressed the need and possibility for contacting the outpatient clinic when  
346 necessary. To our knowledge, there are no studies in IRDs on the efficiency of online remote self-  
347 monitoring by completing PROMs on reduction in consultations. Further research will therefore be  
348 needed.

349  
350 Barriers regarding online self-monitoring were mostly related to the functionality of the online  
351 monitoring system. Some patients experienced log-on problems, while others would like to have  
352 access in the system to more extensive information about their health status in general (e.g. blood test  
353 results). Literature in the field of technology and innovations indicates that factors such as  
354 compatibility, complexity, and relative advantage influence the adoption of new innovations.<sup>31</sup>  
355 Therefore, a self-monitoring program should be comprehensible and user-friendly and preferably  
356 integrated into an existing hospital system. In addition, we recommend screening patients on  
357 motivation and computer skills and providing guided practice. Despite experienced barriers, almost

L. Renskers, S.A.A. Rongen-van Dartel, A.M.P. Huis, and P.L.C.M. van Riel

1  
2  
3 358 half of the participants reached the end of the study, and the follow-up duration was almost one year.  
4  
5 359 Since there was no real 'need' or urgency for self-monitoring in our study, as opposed to blood glucose  
6  
7 360 monitoring in diabetes, for example, reaching complete (100%) adherence was not a realistic option.  
8  
9  
10 361 Even so, adherence to the PROM frequency was reasonably high. Sending reminders to fill in PROMs  
11  
12 362 was possibly related to these reasonably high rates, and was considered by the patients to be very  
13  
14 363 useful.

15  
16 364  
17  
18 365 By using qualitative methods we were able to examine the experiences and barriers that influence  
19  
20 366 participation in self-monitoring programs. This resulted in a thorough understanding of the concept of  
21  
22 367 self-monitoring, and guidance for further development. The main limitation of this study was the  
23  
24 368 selective, highly motivated study population. Of over 1800 patients with an IRD at the outpatient clinic,  
25  
26 369 47 patients participated. Because of the small study sample, it remains unclear which percentage of  
27  
28 370 the total population will be eligible for self-monitoring. However, the main purpose was to gather  
29  
30 371 experiences about self-monitoring, which were provided by the extensive comments of the patients.

31  
32 372  
33  
34 373 In the present study, patients were willing and able to self-monitor their disease. By monitoring their  
35  
36 374 disease activity at home, they were involved in their own disease management and had individual  
37  
38 375 control and responsibilities. During outpatient visits, patients might be better prepared to interact with  
39  
40 376 their HCP, which will improve shared-decision making, contributing to the concept of personalized  
41  
42 377 care. Self-monitoring – as a prerequisite of self-management – might benefit the cost-effectiveness of  
43  
44 378 outpatient consultations. Efficiency gains are reflected in a reduction in the number of consultations  
45  
46 379 without any increase in costs. At the same time, patient outcomes and patients' satisfaction should  
47  
48 380 either remain stable or increase. This study is a first step toward personalized healthcare and involving  
49  
50 381 the patient in decision making about their disease treatment. Findings from our study were used to  
51  
52 382 implement a self-monitoring program at our outpatient clinic using the Integrated Electronic Patient  
53  
54 383 Record from the hospital.  
55  
56  
57  
58  
59  
60

L. Renskers, S.A.A. Rongen-van Dartel, A.M.P. Huis, and P.L.C.M. van Riel

384 The present study showed the potential of self-monitoring as a first step toward disease self-  
385 management. Patients reported that they gained more knowledge, felt less dependent on their HCP,  
386 and most of them were able to monitor their disease. Therefore, we believe that self-monitoring can  
387 benefit the quality and efficiency of healthcare. Further research will be needed to confirm the cost-  
388 effectiveness of self-monitoring.

389

#### 390 **Acknowledgment**

391 The authors would like to thank the study participants and Jolanda van Haren (the second coder). They  
392 would also like to thank Pfizer for getting the opportunity to test iMonitor.

393

#### 394 **Contributors**

395 The final manuscript has been seen and approved by all authors. PvR was involved in the study  
396 acquisition. All authors contributed in the study design process. PvR and LR collected the qualitative  
397 data. LR collected the quantitative data. LR was involved as one of the coders during the coding  
398 process. All authors were involved in the data analysis, as well as in the writing process.

399

#### 400 **Conflicts of interest**

401 None declared.

402

#### 403 **Funding**

404 This study was partly funded by Pfizer Medical and Educational Goods and Services.

405

#### 406 **Ethics**

407 The Medical Ethical Committee of the Radboud University Medical Center Nijmegen approved the  
408 study (2016-2435) and concluded that no specific obligations were applicable to this research.

409

L. Renskers, S.A.A. Rongen-van Dartel, A.M.P. Huis, and P.L.C.M. van Riel

1  
2  
3  
4  
5  
6  
7  
8  
9  
10  
11  
12  
13  
14  
15  
16  
17  
18  
19  
20  
21  
22  
23  
24  
25  
26  
27  
28  
29  
30  
31  
32  
33  
34  
35  
36  
37  
38  
39  
40  
41  
42  
43  
44  
45  
46  
47  
48  
49  
50  
51  
52  
53  
54  
55  
56  
57  
58  
59  
60

410 **Data**

411 Additional data is available from the corresponding author on reasonable request.

For peer review only

L. Renskers, S.A.A. Rongen-van Dartel, A.M.P. Huis, and P.L.C.M. van Riel

412 **References**

413

- 414 1. Crawford MJ, Rutter D, Manley C, et al. Systematic review of involving patients in the  
415 planning and development of health care. *BMJ* 2002;325(7375):1263.
- 416 2. Towle A, Bainbridge L, Godolphin W, et al. Active patient involvement in the education of  
417 health professionals. *Med Educ* 2010;44(1):64-74.
- 418 3. Bodenheimer T, Lorig K, Holman H, et al. Patient self-management of chronic disease in  
419 primary care. *JAMA* 2002;288(19):2469-75.
- 420 4. Barlow J, Wright C, Sheasby J, et al. Self-management approaches for people with chronic  
421 conditions: a review. *Patient Educ Couns* 2002;48(2):177-87.
- 422 5. Kon AA. The shared decision-making continuum. *JAMA* 2010;304(8):903-04.
- 423 6. McKinstry B. Paternalism and the doctor-patient relationship in general practice. *Br J Gen  
424 Pract* 1992;42(361):340-42.
- 425 7. Wilde MH, Garvin S. A concept analysis of self-monitoring. *J Adv Nurs* 2007;57(3):339-50.
- 426 8. Song M, Lipman TH. Concept analysis: Self-monitoring in type 2 diabetes mellitus. *Int J Nurs  
427 Stud* 2008;45(11):1700-10.
- 428 9. van Riel P, Alten R, Combe B, et al. Improving inflammatory arthritis management through  
429 tighter monitoring of patients and the use of innovative electronic tools. *RMD Open*  
430 2016;2(2):e000302.
- 431 10. Welsing PMJ, Landewe RBM, van Riel PLCM, et al. The relationship between disease activity  
432 and radiologic progression in patients with rheumatoid arthritis - A longitudinal analysis.  
433 *Arthritis Rheum* 2004;50(7):2082-93. doi: 10.1002/art.20350
- 434 11. Taal E, Riemsma RP, Brus HL, et al. Group education for patients with rheumatoid arthritis.  
435 *Patient Educ Couns* 1993;20(2-3):177-87.



L. Renskers, S.A.A. Rongen-van Dartel, A.M.P. Huis, and P.L.C.M. van Riel

- 1  
2  
3 436 12. Smolen JS, Breedveld FC, Burmester GR, et al. Treating rheumatoid arthritis to target: 2014  
4  
5 437 update of the recommendations of an international task force. *Ann Rheum Dis* 2016;75(1):3-  
6  
7 438 15.  
8  
9  
10 439 13. Arnold E, Arnold W, Conaway D, et al. Physician Visits Create a Bottleneck in RA  
11  
12 440 Management: The Rheumatologist; 2015 [Available from: [https://www.the-](https://www.the-rheumatologist.org/article/rheumatoid-arthritis-practice-performance-project-spots-problems-in-ra-management/)  
13  
14 441 [rheumatologist.org/article/rheumatoid-arthritis-practice-performance-project-spots-](https://www.the-rheumatologist.org/article/rheumatoid-arthritis-practice-performance-project-spots-problems-in-ra-management/)  
15  
16 442 [problems-in-ra-management/](https://www.the-rheumatologist.org/article/rheumatoid-arthritis-practice-performance-project-spots-problems-in-ra-management/)] accessed 25 February 2019.  
17  
18  
19 443 14. Jain VK, Negi VS. Inflammatory rheumatic diseases in the elderly. *Indian J Rheumatol*  
20  
21 444 2016;11(4):207.  
22  
23 445 15. Hendrikx J, Fransen J, van Riel PL. Monitoring rheumatoid arthritis using an algorithm based  
24  
25 446 on patient-reported outcome measures: a first step towards personalised healthcare. *RMD*  
26  
27 447 *Open* 2015;1(1):e000114.  
28  
29  
30 448 16. El Miedany Y. PROMs in inflammatory arthritis: moving from static to dynamic. *Clin*  
31  
32 449 *Rheumatol* 2013;32(6):735-42. doi: 10.1007/s10067-013-2228-0  
33  
34 450 17. Aletaha D, Neogi T, Silman AJ, et al. 2010 rheumatoid arthritis classification criteria: an  
35  
36 451 American College of Rheumatology/European League Against Rheumatism collaborative  
37  
38 452 initiative. *Arthritis Rheum* 2010;62(9):2569-81.  
39  
40  
41 453 18. Kelyon. What is iMonitor? 2018 [Available from:  
42  
43 454 <http://www.kelyon.com/en/project/imonitor>] accessed 11<sup>th</sup> July 2019.  
44  
45  
46 455 19. Flottorp SA, Oxman AD, Krause J, et al. A checklist for identifying determinants of practice: a  
47  
48 456 systematic review and synthesis of frameworks and taxonomies of factors that prevent or  
49  
50 457 enable improvements in healthcare professional practice. *Implement Sci* 2013;8(1):35.  
51  
52 458 20. Barlow J, Wright C. Knowledge in patients with rheumatoid arthritis: a longer term follow-up  
53  
54 459 of a randomized controlled study of patient education leaflets. *Br J Rheumatol*  
55  
56 460 1998;37(4):373-76.  
57  
58  
59  
60

L. Renskers, S.A.A. Rongen-van Dartel, A.M.P. Huis, and P.L.C.M. van Riel

- 461 21. Joseph-Williams N, Elwyn G, Edwards A. Knowledge is not power for patients: a systematic  
462 review and thematic synthesis of patient-reported barriers and facilitators to shared decision  
463 making. *Patient Educ Couns* 2014;94(3):291-309.
- 464 22. El Miedany Y, El Gaafary M, Palmer D. Assessment of the utility of visual feedback in the  
465 treatment of early rheumatoid arthritis patients: a pilot study. *Rheumatol Int*  
466 2012;32(10):3061-68.
- 467 23. Poolsup N, Suksomboon N, Rattanasookchit S. Meta-analysis of the benefits of self-  
468 monitoring of blood glucose on glycemc control in type 2 diabetes patients: an update.  
469 *Diabetes Technol Ther* 2009;11(12):775-84.
- 470 24. Hunt CW. Technology and diabetes self-management: an integrative review. *World J*  
471 *Diabetes* 2015;6(2):225.
- 472 25. Nakamura N, Koga T, Iseki H. A meta-analysis of remote patient monitoring for chronic heart  
473 failure patients. *J Telemed Telecare* 2014;20(1):11-17.
- 474 26. Conway A, Inglis SC, Clark RA. Effective technologies for noninvasive remote monitoring in  
475 heart failure. *Telemed J E Health* 2014;20(6):531-38.
- 476 27. Bray EP, Holder R, Mant J, et al. Does self-monitoring reduce blood pressure? Meta-analysis  
477 with meta-regression of randomized controlled trials. *Ann Med* 2010;42(5):371-86.
- 478 28. Uhlig K, Patel K, Ip S, et al. Self-measured blood pressure monitoring in the management of  
479 hypertension: a systematic review and meta-analysis. *Ann Intern Med* 2013;159(3):185-94.
- 480 29. Heneghan C, Ward A, Perera R, et al. Self-monitoring of oral anticoagulation: systematic  
481 review and meta-analysis of individual patient data. *Lancet* 2012;379(9813):322-34.
- 482 30. McBain H, Shipley M, Newman S. The impact of self-monitoring in chronic illness on  
483 healthcare utilisation: a systematic review of reviews. *BMC Health Serv Res* 2015;15(1):565.
- 484 31. Rogers EM. *Diffusion of innovations*: Simon and Schuster 2010.

Figure 1. Follow-up duration in days of the 47 iMonitor participants

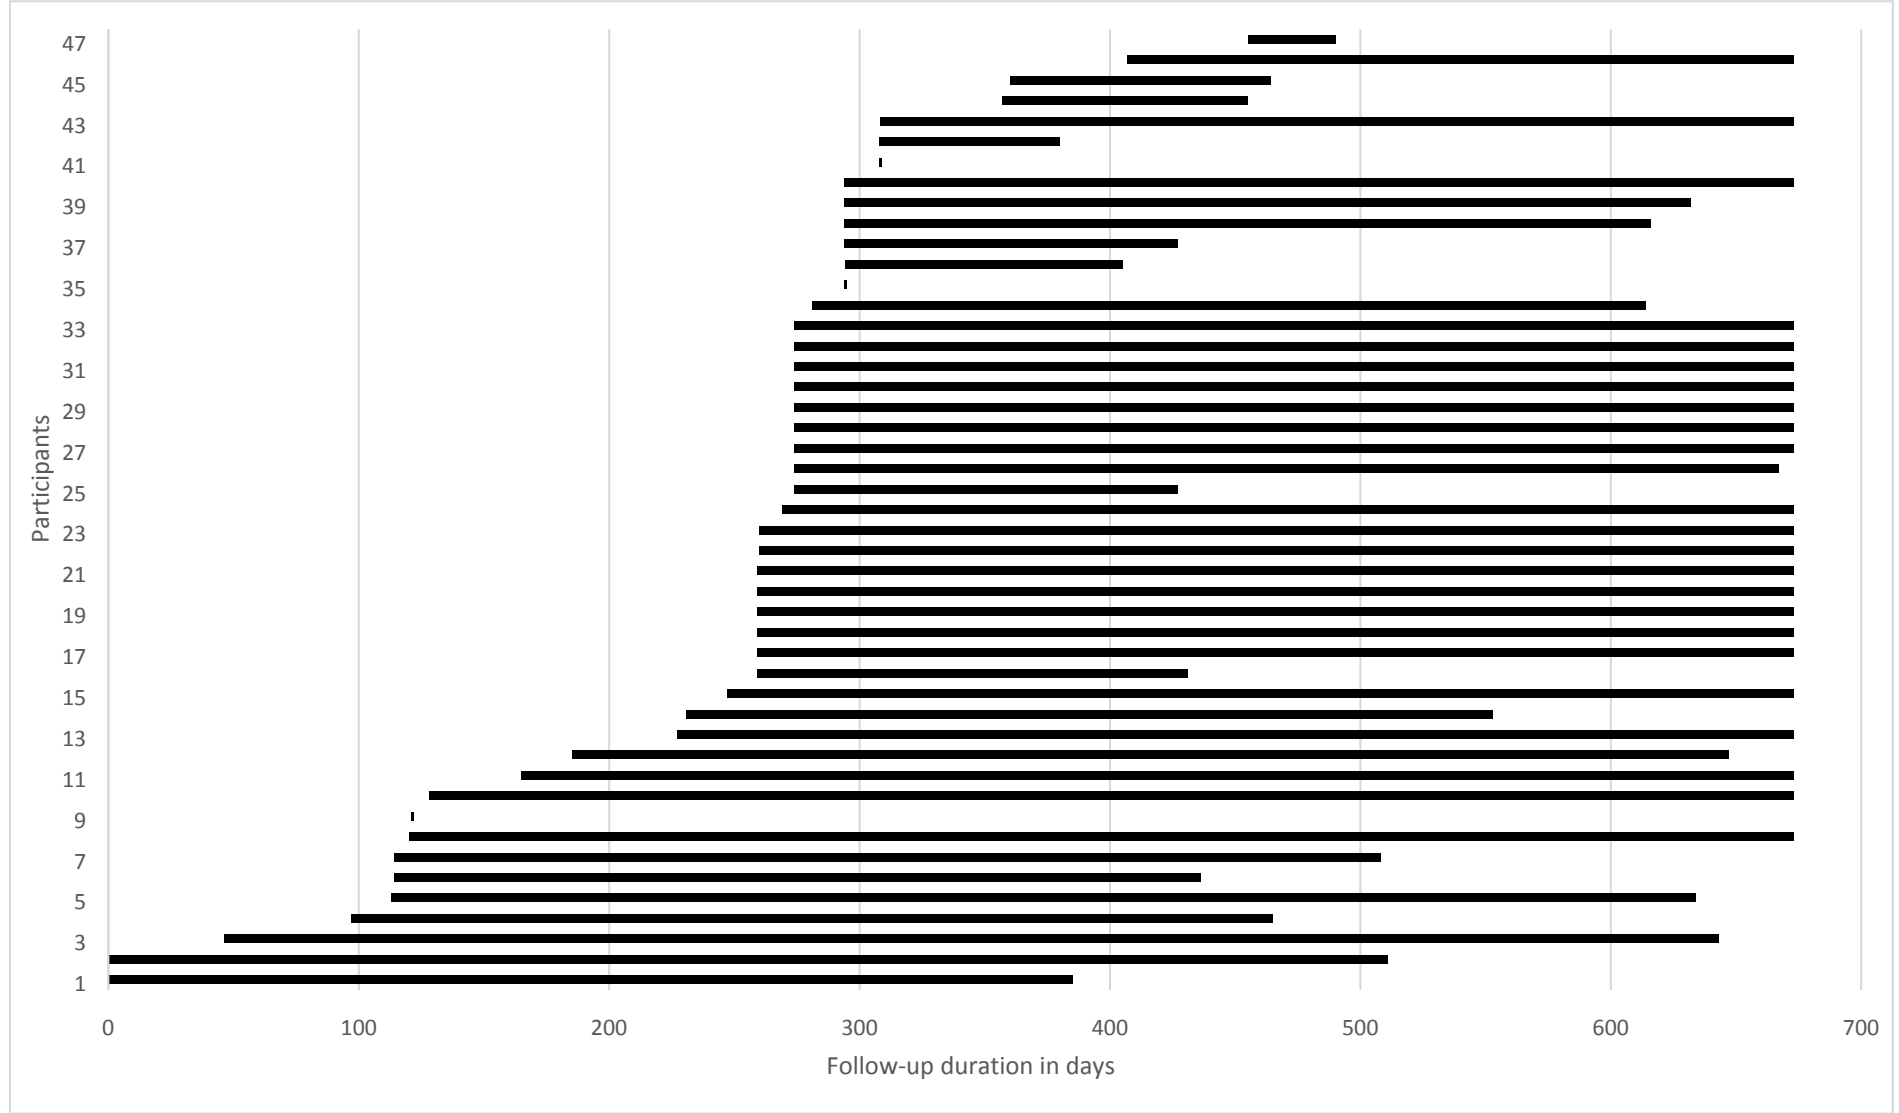

Y-axis: 47 patients who participated in the self-monitoring program, each line represents a patient; X-axis: days since start of study (different start days possible for patients)

Figure 2. Example of a positive (above) and negative (below) rating regarding the PROM-DAS28 congruence

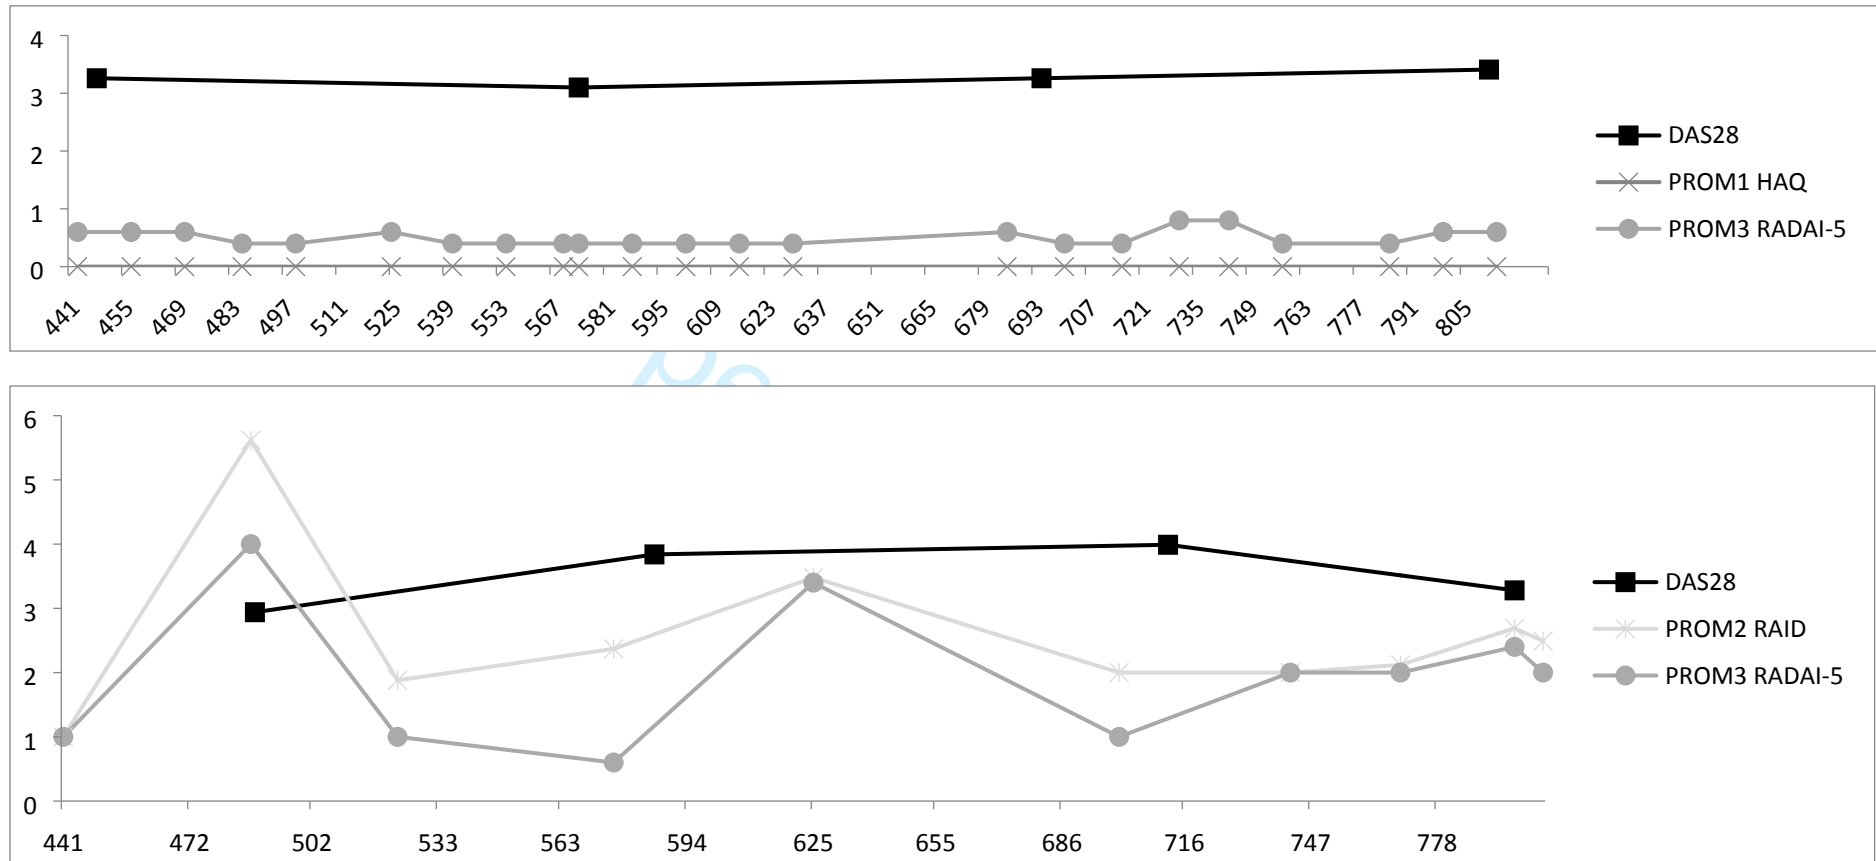

DAS28: Disease Activity Score 28; PROM: Patient-Reported Outcome Measure; HAQ: Health Assessment Questionnaire; RADAI-5: Rheumatoid Arthritis Disease Activity Index-5; RAID: Rheumatoid Arthritis Impact of Disease.

Above: good congruence between PROM-values and DAS28-scores. Below: poor congruence between PROM-values and DAS28-scores

# BMJ Open

## Patients' experiences regarding self-monitoring of the disease course: an observational study in patients with Inflammatory Rheumatic Diseases

|                                 |                                                                                                                                                                                                                                                                                            |
|---------------------------------|--------------------------------------------------------------------------------------------------------------------------------------------------------------------------------------------------------------------------------------------------------------------------------------------|
| Journal:                        | <i>BMJ Open</i>                                                                                                                                                                                                                                                                            |
| Manuscript ID                   | bmjopen-2019-033321.R1                                                                                                                                                                                                                                                                     |
| Article Type:                   | Original research                                                                                                                                                                                                                                                                          |
| Date Submitted by the Author:   | 05-Nov-2019                                                                                                                                                                                                                                                                                |
| Complete List of Authors:       | Renskers, Lisanne; Radboudumc, IQ healthcare<br>Rongen-van Dartel, Sanne; Radboudumc, IQ healthcare; Bernhoven Hospital Location Uden, Rheumatology<br>Huis, Anita; Radboudumc, IQ healthcare<br>van Riel, Piet; Radboudumc, IQ healthcare; Bernhoven Hospital Location Uden, Rheumatology |
| <b>Primary Subject Heading</b>: | Rheumatology                                                                                                                                                                                                                                                                               |
| Secondary Subject Heading:      | Qualitative research, Rheumatology, Patient-centred medicine                                                                                                                                                                                                                               |
| Keywords:                       | RHEUMATOLOGY, QUALITATIVE RESEARCH, EDUCATION & TRAINING (see Medical Education & Training)                                                                                                                                                                                                |
|                                 |                                                                                                                                                                                                                                                                                            |

SCHOLARONE™  
Manuscripts

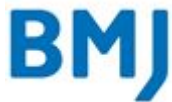

I, the Submitting Author has the right to grant and does grant on behalf of all authors of the Work (as defined in the below author licence), an exclusive licence and/or a non-exclusive licence for contributions from authors who are: i) UK Crown employees; ii) where BMJ has agreed a CC-BY licence shall apply, and/or iii) in accordance with the terms applicable for US Federal Government officers or employees acting as part of their official duties; on a worldwide, perpetual, irrevocable, royalty-free basis to BMJ Publishing Group Ltd ("BMJ") its licensees and where the relevant Journal is co-owned by BMJ to the co-owners of the Journal, to publish the Work in this journal and any other BMJ products and to exploit all rights, as set out in our [licence](#).

The Submitting Author accepts and understands that any supply made under these terms is made by BMJ to the Submitting Author unless you are acting as an employee on behalf of your employer or a postgraduate student of an affiliated institution which is paying any applicable article publishing charge ("APC") for Open Access articles. Where the Submitting Author wishes to make the Work available on an Open Access basis (and intends to pay the relevant APC), the terms of reuse of such Open Access shall be governed by a Creative Commons licence – details of these licences and which [Creative Commons](#) licence will apply to this Work are set out in our licence referred to above.

Other than as permitted in any relevant BMJ Author's Self Archiving Policies, I confirm this Work has not been accepted for publication elsewhere, is not being considered for publication elsewhere and does not duplicate material already published. I confirm all authors consent to publication of this Work and authorise the granting of this licence.

L. Renskers, S.A.A. Rongen-van Dartel, A.M.P. Huis, and P.L.C.M. van Riel

1  
2  
3 **1 Full title**

4  
5 2 Patients' experiences regarding self-monitoring of the disease course: an observational study in  
6  
7 3 patients with Inflammatory Rheumatic Diseases

8  
9  
10 **5 Author names and ORCID ID numbers**

11 6 Lianne Renskers (0000-0003-1413-1629)  
12  
13 7 Sanne Rongen-van Dartel (0000-0002-2536-0024)  
14  
15 8 Anita Huis (0000-0003-1144-163X)  
16  
17 9 Piet van Riel (0000-0001-7719-8906)

18  
19  
20 **11 Keywords**

21 12 Rheumatoid Arthritis; Spondyloarthritis; Patient Perspective; Psoriatic Arthritis; Qualitative research

22  
23  
24  
25 **14 Institution**

26 15 Radboud university medical center, Radboud Institute for Health Sciences  
27  
28 16 IQ healthcare  
29  
30 17 Geert Grooteplein 21  
31  
32 18 PO Box 9101 (114)  
33  
34 19 6500 HB Nijmegen  
35  
36 20 The Netherlands  
37  
38 21 Telephone number: (0031) 24 36 15305

39  
40 **23 Author affiliations**

41 24 L. Renskers<sup>1</sup>, MSc., S.A.A. Rongen- van Dartel<sup>1,2</sup>, PhD., A.M.P. Huis<sup>1</sup>, PhD., P.L.C.M. van Riel<sup>1,2</sup>, MD,  
42  
43 25 PhD.

44  
45 26 <sup>1</sup>Radboud university medical center, Radboud Institute for Health Sciences, IQ healthcare, Nijmegen,  
46  
47 27 the Netherlands, <sup>2</sup>Bernhoven, Department of Rheumatology, Uden

48  
49  
50  
51 **29 Corresponding author**

52 30 Lianne Renskers, MSc.  
53  
54 31 Radboud university medical center  
55  
56 32 Scientific Center for Quality of Healthcare (IQ healthcare)  
57  
58 33 PO Box 9101 (114)  
59  
60 34 6500 HB Nijmegen, The Netherlands

L. Renskers, S.A.A. Rongen-van Dartel, A.M.P. Huis, and P.L.C.M. van Riel

Telephone number: (0031) 24 36 10329 – E-mail address: lisanne.renskers@radboudumc.nl

### Abstract

**Objectives.** Self-monitoring the disease course is a relatively new concept in the management of patients with Inflammatory Rheumatic Diseases (IRDs). The aims of this pilot study were to obtain patients' experiences with online self-monitoring, to assess information about the agreement between the disease course assessed with Patient Reported Outcome Measures (PROMs) and an objectively measured Disease Activity Score by the rheumatologist (DAS28), and to assess adherence to predetermined PROM frequency intervals.

**Design.** Observational study using qualitative and quantitative methods.

**Setting.** The rheumatology outpatient clinic of a teaching hospital in the Netherlands (secondary care).

**Participants:** 47 Patients with an IRD who regularly attended the outpatient clinic.

**Methods.** Patients completed PROMs by using an online self-monitoring program. Their experiences regarding self-monitoring were qualitatively assessed through a focus group discussion and telephone interviews using a thematic analysis approach. Adherence to the predefined PROM frequency (completed PROM assessments within the predetermined frequency) and the agreement between the DAS28 course and PROM values (Rheumatoid Arthritis Disease Activity Index-5 (RADAI-5) and the Rheumatoid Arthritis Impact of Disease (RAID)) were quantitatively assessed using descriptives.

**Results.** Forty-seven patients participated, most of them diagnosed with RA (n = 38, 80.9%). Three themes were identified: knowledge about and insight into disease (activity), patient-professional interaction, and functionality of the program. Mean adherence to the predetermined PROM frequency was 68.1%. The RAID showed the best agreement with the DAS28 course. Mean participation time was 350 days.



L. Renskers, S.A.A. Rongen-van Dartel, A.M.P. Huis, and P.L.C.M. van Riel

1  
2  
3 61  
4  
5  
6 62  
7  
8 63  
9  
10 64  
11  
12 65  
13  
14 66  
15  
16 67  
17  
18  
19 68  
20  
21  
22  
23  
24  
25  
26  
27  
28  
29  
30  
31  
32  
33  
34  
35  
36  
37  
38  
39  
40  
41  
42  
43  
44  
45  
46  
47  
48  
49  
50  
51  
52  
53  
54  
55  
56  
57  
58  
59  
60

Conclusion. Patients were predominantly positive about online self-monitoring. They indicated that they gained more knowledge about their disease, felt less dependent on the healthcare professional, and valued the insight into their long-term disease course. Barriers were mostly related to technical factors. Patients were able to and willing to self-monitor their disease, which could contribute to a more efficient allocation of outpatient consultations in the future.

For peer review only

L. Renskers, S.A.A. Rongen-van Dartel, A.M.P. Huis, and P.L.C.M. van Riel

69 **Article summary**

70

71 Strengths and limitations of this study:

72

73 • A strength of this study is the use of both qualitative and quantitative research methods,  
74 providing a rich understanding of factors associated with self-monitoring

75 • Patients were closely involved during the development stage, execution, and evaluation  
76 stage of this study

77 • Using validated Patient Reported Outcome Measures (PROMs) allowed us to both examine  
78 what really matters to patients and to compare these PROM scores with objective scores

79 • Due to the selective and small study population it is not clear which percentage of the total  
80 population with IRD is willing to and able to self-monitor the disease course

81

L. Renskers, S.A.A. Rongen-van Dartel, A.M.P. Huis, and P.L.C.M. van Riel

## 82 Introduction

83 In chronic care, there is a tendency toward personalized healthcare. Patients have become more  
84 empowered and are increasingly involved in the planning and development of healthcare.<sup>1-4</sup> There is a  
85 shift from a paternalistic model (in which the doctor is dominant and believes that patients need to be  
86 guided through the decision making process) to a shared-decision making model (in which doctor and  
87 patient make mutual, collaborative decisions). This shift requires an engaged patient who takes  
88 responsibilities regarding day-to-day disease management.<sup>5-8</sup> As a result of this shift, new roles for  
89 both patients and healthcare professionals (HCPs) have arisen. An example of what this new role  
90 entails for a patient is self-monitoring, in which a patient undertakes self-measurement of vital signs,  
91 symptoms, behavior, or psychological well-being through Patient-Reported Outcome Measures  
92 (PROMs).<sup>9-10</sup> In some patients with Inflammatory Rheumatic Diseases (IRDs) such as Rheumatoid  
93 Arthritis (RA), Psoriatic Arthritis (PsA), or Ankylosing Spondylitis (AS), self-monitoring can gradually  
94 replace the traditional monitoring by HCPs.<sup>11</sup> Examples of disease-specific PROMs in IRDs that can be  
95 used in self-monitoring are the Rheumatoid Arthritis Impact of Disease<sup>12</sup> (RAID), which measures  
96 disease impact, and the Rheumatoid Arthritis Disease Activity Index-5<sup>13</sup> (RADAI-5), which measures  
97 disease activity. An example of a general or non-specific PROM is the Health Assessment Questionnaire  
98 (HAQ), measuring functional status.

99 There are however also other reasons why self-monitoring in patients with IRD has gained  
100 more interest. Usual care in patients with IRDs is primarily aimed at suppressing disease activity, in  
101 order to prevent structural damage.<sup>14-15</sup> The disease activity can be measured using a composite index,  
102 the Disease Activity Score using 28 joint counts<sup>16</sup>, which measures tender and swollen joint counts,  
103 acute phase response, and a patient's general health assessment. The Treat-to-Target Task Force  
104 recommends rheumatologists to monthly assess patients with moderate or high disease activity, and  
105 patients with controlled and low disease activity every three to six months.<sup>17</sup> In practice, however,  
106 these frequencies are not always met for various reasons. This strategy causes time constraints and a  
107 growing workload among rheumatologists, making it not manageable for all rheumatologists to comply

L. Renskers, S.A.A. Rongen-van Dartel, A.M.P. Huis, and P.L.C.M. van Riel

1  
2  
3 108 fully to the frequent assessments.<sup>18</sup> Another reason is connected to the aging population. The number  
4  
5 109 and proportion of patients with IRDs aged 65 and over will increase in the near future.<sup>19</sup> Self-  
6  
7 110 monitoring of the disease course using disease-specific PROMs such as RAID or RADAI-5 could prove  
8  
9  
10 111 to be a solution in diminishing the number of consultations.<sup>20</sup> As disease activity can only be objectively  
11  
12 112 assessed during outpatient consultations, it remains unclear what happens to the disease activity in-  
13  
14 113 between consultations. Fluctuations and peaks in disease activity are easily missed or they remain  
15  
16 114 unnoticed, which could have disastrous consequences regarding joint damage.<sup>14</sup> Self-monitoring might  
17  
18 115 also give a better insight into these fluctuations of disease activity in-between outpatient clinical  
19  
20 116 consultations. Moreover, some patients visit their rheumatologist while their disease activity is under  
21  
22  
23 117 control, thereby contributing to unnecessary outpatient consultations. Summarizing, self-monitoring  
24  
25 118 of disease activity in IRDs as a first step toward personalized healthcare enables patients as well as  
26  
27 119 HCPs to get insight into the disease activity course over time. Moreover, it may lead to a more  
28  
29 120 consistent reporting in the long term and may contribute to optimizing the number, timing, and  
30  
31 121 efficiency of consultations.<sup>11 20</sup> By completing PROMs, patients who need further medical attention can  
32  
33 122 be identified and receive additional medical attention. Moreover, completion of a PROM will help a  
34  
35 123 patient to prepare for a visit and it could improve the communication between physician and patient.<sup>21</sup>

36  
37  
38  
39 124 <sup>22</sup>

40  
41 125 In the present study an online self-monitoring program was pilot-tested in order to test the  
42  
43 126 feasibility of self-monitoring before implementation of a self-monitoring program in daily clinical  
44  
45 127 practice. The aims of this study were to obtain patients' experiences regarding online self-monitoring,  
46  
47 128 to assess the agreement between the disease course assessed with disease-specific PROMs (RAID and  
48  
49 129 RADAI-5) and an objectively measured disease activity score (DAS28) by the rheumatologist, and to  
50  
51 130 assess the adherence to predetermined PROM frequency intervals.

52  
53  
54 131

L. Renskers, S.A.A. Rongen-van Dartel, A.M.P. Huis, and P.L.C.M. van Riel

1  
2  
3 132 **Methods**

4  
5 133 *Study design*

6  
7 134 This observational study using quantitative and qualitative research methods, was conducted at a  
8  
9 135 teaching hospital in Uden (the Netherlands) at the rheumatology outpatient clinic from 6 July 2015  
10 136 until 9 May 2017.  
11

12  
13  
14 137  
15  
16 138 *Inclusion criteria*

17  
18 139 In order to be eligible for this study, patients had to be diagnosed with an IRD according to the  
19 140 ACR/EULAR criteria.<sup>23</sup> Patients should also have an electronic device (laptop/PC, tablet or Smartphone)  
20 141 available with access to the Internet, and being able to sufficiently read and write Dutch. Patient  
21 142 inclusion started in July 2015 and we included the last patient in October 2016.  
22  
23  
24  
25  
26  
27  
28  
29

30 144 *Follow-up duration*

31  
32 145 Patients were able to withdraw from the program at any time point. We defined early study  
33 146 termination in two manners: when a patient reported to withdraw from the self-monitoring program,  
34 147 this was evaluated as the end date. Some patients did not report dropping out of the study but did  
35 148 stop completing PROM(s). End of study in these cases was set by adding the interval time to the date  
36 149 the last PROM was filled in. For example, a patient with a four-week PROM frequency (28 days)  
37 150 completed the last PROM on 1 March 2017. For this patient, end of study date was set on 29 March  
38 151 2017.  
39  
40  
41  
42  
43  
44  
45  
46  
47  
48  
49

50 153 *Self-monitoring program*

51  
52 154 iMonitor, the online self-monitoring program tested in this study, was developed by Pfizer.<sup>24</sup> The  
53 155 program was accessible through a laptop, tablet or Smartphone by filling in a user name, password,  
54 156 and pin code. The program complied with the required privacy standards. Because the program was  
55 157 intended to stimulate patient involvement, personalized healthcare and patient self-management,  
56  
57  
58  
59  
60

L. Renskers, S.A.A. Rongen-van Dartel, A.M.P. Huis, and P.L.C.M. van Riel

158 patients selected their preferred PROM(s) and PROM frequency (one-, two-, four-, six- or eight-weekly)  
159 in advance and the system generated an email-alert for filling in a PROM (or PROMs) accordingly.  
160 Patients were able to complete one or more PROMs within a timeframe of 24 hours. They could send  
161 a message to the HCPs in case of questions or notifications by using the message option. In case of  
162 urgent matters, they could contact the outpatient clinic by telephone.

163

#### 164 *Patient-Reported Outcome Measures (PROMs)*

165 Available disease-specific PROMs for patients with RA were the RAID and the RADAI-5, measuring  
166 disease impact (0-10; 10 = severe impact of disease activity) and disease activity (0-10; 10 = severe  
167 disease activity). Patients with AS could fill in the disease-specific Bath Ankylosing Spondylitis Disease  
168 Activity Index (BASDAI), measuring disease activity (0-10; 10 = severe disease activity), and/or the Bath  
169 Ankylosing Spondylitis Functional Index (BASFI), measuring physical function (0-10; 10 = severe  
170 functional limitation). The HAQ, general PROM that measures physical function, was available for all  
171 patients (0-3; 3 = severe disability). Patients could opt to assess one to three PROMs. Completion of all  
172 PROMs took about 5 minutes. After completion, the PROM scores were subsequently displayed in a  
173 graph. Additionally, DAS28 scores (0-10; remission:  $DAS28 < 2.6$ , low disease activity:  $\geq 2.6$   $DAS28 < 3.2$ ,  
174 moderate disease activity:  $\geq 3.2$   $DAS28 \leq 5.1$ , high disease activity:  $DAS28 > 5.1$ ) could be added to the  
175 graph by the HCP. These DAS28 scores were obtained by the HCPs during outpatient consultations and  
176 were kept in the electronic medical files from the hospital.

177

#### 178 *Procedure*

179 Patients were informed about this pilot study and recruited in several ways. Firstly, we used purposive  
180 sampling: rheumatologists themselves asked possible suitable patients to participate during  
181 outpatient consultations during the entire study period. Secondly, during general information  
182 meetings at the hospital, patients were informed about the study and were able to sign up. Lastly,  
183 leaflets about the study were available in the waiting room and patients were informed about the

L. Renskers, S.A.A. Rongen-van Dartel, A.M.P. Huis, and P.L.C.M. van Riel

184 study through the hospital's website. Patients received a manual containing information regarding  
185 access to and use of the program. However, a substantial number needed additional training, which  
186 was provided by instruction classes. After patients had been instructed how to use the program, they  
187 could indicate which PROM(s) they preferred to fill in by showing them the paper versions. Moreover,  
188 they were asked to indicate their desired frequency option. Patients who agreed to take part in the  
189 study were asked to sign a consent form. During the regular outpatient consultations, rheumatologists  
190 were expected to provide feedback to the patient about the patient's disease course and PROM  
191 results.

192

### 193 *Data collection and analysis*

#### 194 Quantitative methods

##### 195 ■ Adherence and agreement

196 Firstly, we determined adherence to the predetermined PROM frequency by assessing whether a  
197 patient had completed (yes or no) the PROM(s) in the predetermined time interval. Adherence was  
198 calculated as the number of completed assessments by the patient divided by the number of PROM  
199 assessments that should have been completed according to the chosen interval of the patient times  
200 100%. For example, a patient with a weekly PROM frequency participated for one year. This patient  
201 should have received 52 email-alerts, so 52 PROM assessments should have been completed. This  
202 patient completed 40 PROM assessments, so adherence is  $(40/52*100 = )$  76.9%. Secondly, we  
203 determined the agreement between the DAS28 course and PROM values. Two researchers (LR and  
204 PvR) independently assessed agreement by comparing the DAS28 course with the corresponding  
205 PROM-value(s) from the RAID and/or RADAI-5 using two categories (poor and good) and discussed  
206 discrepancies. The RAID and the RADAI-5 were used, because these two disease-specific PROMs  
207 measure disease impact and activity, whereas the HAQ is non-disease specific. 'Good' was used in  
208 cases where the DAS28 course and the PROM scores showed the same direction (i.e. the DAS28 course  
209 increased and PROM scores as well). 'Poor' was used in cases where the DAS28 course and PROM

L. Renskers, S.A.A. Rongen-van Dartel, A.M.P. Huis, and P.L.C.M. van Riel

210 scores showed opposite directions (the DAS28 course increased and PROM scores decreased (or the  
211 other way around). Data from patients with at least three PROM values (falling within a fourteen-day-  
212 window with DAS28 assessment) were assessed.

213

214 *Qualitative methods*

215 Patients' experiences with the self-monitoring program were obtained via a focus group and semi-  
216 structured interviews. The purpose of the focus group and interviews was to gain insight into relevant  
217 factors that might hinder or facilitate patients using the self-monitoring program. The checklist from  
218 Flottorp et al.<sup>25</sup> served as an inspiration for a semi-structured topic guide (see appendix). Relevant  
219 domains for our topic guide were: program factors; patient factors; professional-patient interaction  
220 factors; and resources. Prior to the start of the focus group discussion we conducted a telephone  
221 interview with one patient to check the appropriateness of the topic guide and to check whether the  
222 questions were clear. During the focus group discussion, an experienced moderator (PvR) guided the  
223 discussion. Patients unable to attend the focus group were interviewed by telephone, using the same  
224 topic guide. All participating patients had at least six months experience with the self-monitoring  
225 program.

226

227 *Qualitative analysis*

228 The interviews and focus group discussion were recorded. The recordings were and transcribed ad  
229 verbum by an independent agency. One of the researchers (LR) and a research assistant independently  
230 coded the transcripts to increase intercoder reliability. They used the method 'thematic analysis' in  
231 which the codes were derived from the data with the purpose to describe relevant factors regarding  
232 self-monitoring and to identify categories and themes. A constant comparative method was used for  
233 the analysis of the emerging themes. Any discrepancies in the analysis were discussed until consensus  
234 was reached<sup>26</sup>. Afterwards, two researchers (LR and AH) agreed on a provisional categorization and  
235 overarching themes. These categories and overarching themes were also discussed with a third and



L. Renskers, S.A.A. Rongen-van Dartel, A.M.P. Huis, and P.L.C.M. van Riel

236 fourth researcher (SR and PvR). The COnsolidated criteria for REporting Qualitative research (COREQ)  
237 checklist<sup>27</sup> was mainly used as guidance for the reporting of our qualitative research. We conducted  
238 coding and analysis by using a qualitative software program (Atlas.ti).

239

#### 240 *Patient and public involvement*

241 Firstly, patient involvement was needed during the establishment of the topic guide, which was pre-  
242 tested among one patient in order to check if the questions were comprehensible and clear. Secondly,  
243 patients were encouraged to give suggestions and comments regarding the use of the program during  
244 the entire study period. This feedback was used as input for the implementation of a revised version  
245 of the program at a later stage. Lastly, the study participants exchanged their experiences with the  
246 self-monitoring program with other patients (users and non-users) during research meetings at the  
247 hospital.

248

## 249 **Results**

### 250 *Study population*

251 In this pilot study, slightly more women than men participated (n=27; 57.4%). Mean( $\pm$ ) age was  
252 57.3(10.7) years. Most patients (n=38) were diagnosed with RA (80.9%), while nine patients were  
253 diagnosed with a SpA (eight patients with PsA, and one patient with AS). Other baseline characteristics  
254 are given in Table 1. Of over 1800 patients with an IRD, we included 47 patients during the study period.  
255 Two patients eventually signed the informed consent form but did not complete any PROMs and were  
256 withdrawn from the study. An overview of the follow-up duration is presented in Figure 1. In total,  
257 twenty-three patients participated from the start (different start dates were possible) until the end of  
258 the study (48.9%). The follow-up duration of the 45 patients who completed PROMs varied between  
259 14 and 597 days, with a mean of 350 days.

260

261 < Figure 1. Overview of the follow-up duration of the 47 iMonitor participants >

L. Renskers, S.A.A. Rongen-van Dartel, A.M.P. Huis, and P.L.C.M. van Riel

262 Table 1. Baseline characteristics of the 47 patients using the self-monitoring program

263

| Characteristics                                | Rheumatoid arthritis, n = 38 | SpA group, n = 9        |
|------------------------------------------------|------------------------------|-------------------------|
| Patient and disease characteristics            |                              |                         |
| Age, years, mean (SD)                          | 57.74 (11.17)                | 55.67 (8.69)            |
| Female, n (%)                                  | 20 (52.6%)                   | 7 (77.8%)               |
| Disease duration, years, mean (SD)             | 8.08 (4.74)                  | 9.89 (7.25)             |
| DAS28-score, mean (SD)                         | 3.19 (1.25)                  | n.a.                    |
| Educational level                              |                              |                         |
| Low, n (%)                                     | 12 (34.3)                    | 3 (37.5)                |
| Middle, n (%)                                  | 11 (31.4)                    | 3 (37.5)                |
| High, n (%)                                    | 12 (34.3)                    | 2 (25.0)                |
| Baseline PROM-values                           |                              |                         |
| HAQ [0.00-3.00] (n=27), mean, SD, range        | 0.78 (0.61) [0.00;2.38]      | 0.98 (0.60) [0.13;1.88] |
| RADAI-5 [0.00 – 10.00] (n=24), mean, SD, range | 3.49 (2.32) [0.00;7.40]      | n.a.                    |
| RAID [0.00 – 10.00] (n=35) mean, SD, range     | 3.47 (2.28) [0.00;7.61]      | n.a.                    |

L. Renskers, S.A.A. Rongen-van Dartel, A.M.P. Huis, and P.L.C.M. van Riel

|                                       |            |           |
|---------------------------------------|------------|-----------|
| BASFI [0.00 – 10.00] (n=1), mean, SD  | n.a.       | 5.05      |
| BASDAI [0.00 – 10.00] (n=1), mean, SD | n.a.       | 4.60      |
| Medication use                        |            |           |
| csDMARD, n (%)                        | 36 (94.7%) | 8 (88.9%) |
| bDMARD, n (%)                         | 12 (32.0%) | 3 (33.3%) |

264 *SpA: Spondylarthropathy; PROM: Patient-Reported Outcome Measure; HAQ: Health Assessment Questionnaire (3 = severe disability); RADAI-5: Rheumatoid Arthritis Disease*  
 265 *Activity Index-5 (10 = severe disease activity); RAID: Rheumatoid Arthritis Impact of Disease (10 = severe impact of disease activity); BASFI: Bath Ankylosing Spondylitis*  
 266 *Functional Index (10 = severe functional limitation); BASDAI: Bath Ankylosing Spondylitis Disease Activity Index (10 = severe disease activity); csDMARD: conventional*  
 267 *synthetic Disease-Modifying Antirheumatic Drug; bDMARD: biological Disease-Modifying Antirheumatic Drug*

L. Renskers, S.A.A. Rongen-van Dartel, A.M.P. Huis, and P.L.C.M. van Riel

268 *Quantitative*

269     ▪ Adherence and agreement

270 Twenty-seven patients (57.4%) were able to use the self-monitoring program without additional  
 271 training, whereas twenty patients (42.6%) attended the instruction classes. With regard to the PROM  
 272 preferences, RAID was chosen most often, namely 34 times. HAQ and RADAI-5 were chosen 27 and 23  
 273 times, respectively. Seventeen patients chose to complete one PROM, 21 patients chose to complete  
 274 two PROMs, and nine patients chose to complete three PROMs. Mean adherence to the  
 275 predetermined PROM frequency was 68.1%, see table 2. With regard to the agreement between the  
 276 DAS28 course and PROM values, RAID scored best (from 25 assessments, 17 times a score of 'good',  
 277 68.0%). RADAI-5, on the other hand, scored 'good' in ten out of seventeen assessments (58.8%), see  
 278 table 3. Figure 2 shows two examples of assessments regarding the agreement between the DAS28  
 279 course and PROM values.

280

281 Table 2. Data regarding PROM frequency, PROM scores, and adherences rates, n = 47

| Item                                                   | n (%)      |
|--------------------------------------------------------|------------|
| PROM frequency                                         |            |
| 1 week                                                 | 4 (8.5)    |
| 2 weeks                                                | 10 (21.3)  |
| 4 weeks                                                | 31 (66.0)  |
| ≥ 6 weeks                                              | 2 (4.3)    |
| Number of PROMs to complete, chosen by patient         |            |
| One                                                    | 17 (36.17) |
| Two                                                    | 21(44.68)  |
| Three                                                  | 9 (19.15)  |
| Mean adherence (%) to the predetermined PROM frequency | 68.1%      |

282 *PROM: Patient-Reported Outcome Measure; Adherence to the predefined PROM frequency: calculated by*  
 283 *dividing the number of completed PROMs by the number of PROM assessments (based on the reminder emails)*  
 284 *that should have been completed according to the chosen PROM frequency by the patient, times 100*

285

L. Renskers, S.A.A. Rongen-van Dartel, A.M.P. Huis, and P.L.C.M. van Riel

286 < Figure 2. Example of a positive (above) and negative (below) rating regarding the PROM-DAS28  
287 agreement >

288 Table 3. Agreement (poor or good) between the DAS28 course and disease-specific PROMs (RAID and  
289 RADAI-5), assessed in n = 33 patients

| PROM    | Poor      | Good       | Total |
|---------|-----------|------------|-------|
| RAID    | 8 (32.0%) | 17 (68.0%) | 25    |
| RADAI-5 | 7 (41.2%) | 10 (58.8%) | 17    |

290 *PROM: Patient-Reported Outcome Measure; RAID: Rheumatoid Arthritis Impact of Disease; RADAI-5:*  
291 *Rheumatoid Arthritis Disease Activity Index-5; DAS28 course: Disease Activity Score using 28 joint counts,*  
292 *assessed by rheumatologists; Good: DAS28 course and the PROM scores showed the same direction. Poor:*  
293 *DAS28 course and PROM scores showed opposite direction*

294  
295 *Qualitative*

296 We conducted the focus group discussion and telephone interviews between December 2016 and June  
297 2017. The interviews lasted between 24 and 42 minutes, while the focus group discussion lasted one  
298 hour and 22 minutes. Six patients attended the focus group discussion, and four patients participated  
299 in a telephone interview (five female and five male patients).

300  
301 *Patients' experiences regarding the self-monitoring program*

302 Three main themes emerged from the focus group discussion and interviews: knowledge about and  
303 insight into disease (activity), patient-professional interaction, and functionality of the program. Five  
304 subcategories emerged: Disease (self)management, discussing results with healthcare professionals,  
305 technical factors, user interface and PROMs, and patients' suggestions for improvement. Table 4  
306 provides an overview of the themes and subcategories regarding the qualitative analysis.

307

L. Renskers, S.A.A. Rongen-van Dartel, A.M.P. Huis, and P.L.C.M. van Riel

1  
2  
3  
4  
5  
6  
7  
8  
9  
10  
11  
12  
13  
14  
15  
16  
17  
18  
19  
20  
21  
22  
23  
24  
25  
26  
27  
28  
29  
30  
31  
32  
33  
34  
35  
36  
37  
38  
39  
40  
41  
42  
43  
44  
45  
46  
47  
48  
49  
50  
51  
52  
53  
54  
55  
56  
57  
58  
59  
60

308

For peer review only

L. Renskers, S.A.A. Rongen-van Dartel, A.M.P. Huis, and P.L.C.M. van Riel

309 Table 4. Themes and subcategories with regard to the qualitative analysis of patients' experiences  
310 with iMonitor

| Theme                                               | Subcategory                                                                                  |
|-----------------------------------------------------|----------------------------------------------------------------------------------------------|
| Knowledge about and insight into disease (activity) | n.a.                                                                                         |
| Patient-professional interactions                   | - Disease (self)management<br>- Discussing results with healthcare professionals             |
| Functionality of the program                        | - Technical factors<br>- User interface and PROMs<br>- Patients' suggestions for improvement |

311 *Three main themes and five subcategories emerged from the qualitative analysis. The checklist from Flottorp et*  
312 *al.<sup>25</sup> served as a guide for the establishment of the topic guide*

313

314 *Theme I: Knowledge about and insight into disease (activity)*

315 The most cited reason for using the self-monitoring program was that patients gained insight into their  
316 (long-term) disease activity course. Most patients indicated that using the program led to more  
317 knowledge and awareness about their disease. Some patients reported that they recognized peaks in  
318 disease activity earlier and could subsequently prepare for an exacerbation. Patients also mentioned  
319 that they became more prudent when noticing a flare. When asked more specifically about patients'  
320 experiences with the agreement between their PROM values and DAS28 scores, most patients thought  
321 their PROM values were in line with their DAS28.

322 *"By consciously using the program, it was easier to find things about rheumatism and to gain more*  
323 *insight into the question 'What is rheumatism?'"*

L. Renskers, S.A.A. Rongen-van Dartel, A.M.P. Huis, and P.L.C.M. van Riel

324 *Theme II: Patient-professional interactions*

325     ▪ Disease (self)management

326 By using the self-monitoring program, most patients felt less dependent on their HCP. Patients  
327 appreciated the fact that they were able to influence their own disease management. Overall, patients  
328 thought that the self-monitoring program could contribute to a reduction in the number of outpatient  
329 consultations.

330

331 *"I can monitor my disease course, keep record of my disease activity in-between consultations, without  
332 being dependent on the professional"*

333

334     ▪ Discussing results with healthcare professionals

335 Patients emphasized the importance of discussing the results of online monitoring (e.g. PROM values)  
336 with their HCP (rheumatologist or nurse). Most of all, they wanted to know if they were 'doing it right'.  
337 Some patients expressed the value of discussing their results with their HCP. One patient provided the  
338 following scenario: *'I used to look at the back of a computer screen during an outpatient visit. Now, I'm  
339 looking at the computer screen together with my HCP, sharing and discussing the PROM values and our  
340 ideas about my treatment'*. Patients who did not discuss their values felt the need to do so in the  
341 future.

342

343 *Theme III: Functionality of the program*

344     ▪ Technical factors

345 Barriers regarding the use of the self-monitoring program were mostly related to technical aspects.  
346 Some patients had problems with the login system, which hindered them from accessing the website.  
347 Regarding the PROM reminder emails: the system generated an email alert at fixed time points (e.g.  
348 four-weekly). Some patients noticed that the system generated an alert at unfortunate time points or  
349 even no alert at all.



L. Renskers, S.A.A. Rongen-van Dartel, A.M.P. Huis, and P.L.C.M. van Riel

350       ▪ User interface and PROMs

351 Twenty-seven patients joined the instruction classes, which were perceived to be very helpful. Overall,  
352 patients were satisfied with the user interface of the program. They reviewed the layout as clear and  
353 comprehensible. Some patients experienced difficulties with the content and layout of the PROMs. For  
354 example, some patients thought the questions were not specific enough. Furthermore, the program  
355 did not use a progress bar and there was no 'Accomplish' sign after completing a PROM. As a result –  
356 in case of completing more than one PROM – some patients did not know how many PROMs they had  
357 actually completed.

359       ▪ Patients' suggestions for improvement

360 Most commonly mentioned suggestions concerned adjustments to clarify PROM values, for example  
361 a textbox to type a comment in case of an exacerbation. Additionally, patients provided suggestions  
362 concerning the possibility of also having access to their lab values in the self-monitoring program, as  
363 well as the possibility of having a more detailed look at a certain time period.

364

365

L. Renskers, S.A.A. Rongen-van Dartel, A.M.P. Huis, and P.L.C.M. van Riel

366 **Discussion**

367 This study collected experiences from patients with IRDs regarding online self-monitoring. Moreover,  
368 we assessed adherence to the predefined PROM frequency to measure disease activity and the  
369 agreement between the PROMs and the DAS28 course. The qualitative analysis revealed three themes:  
370 knowledge about and insight into disease (activity), patient-professional interaction, and functionality  
371 of the program. Overall, patients were mainly positive about the program and were willing to continue.  
372 Most of them participated for an extended period: mean follow-up duration was almost one year, and  
373 mean adherence to the predefined PROM frequency was 68.1%. Patients reported that they gained  
374 more knowledge about their disease and felt less dependent on their HCP.

375

376 By self-monitoring disease activity, patients obtained a graphic overview of their PROM values over  
377 time, which gave them insight into their disease course. Patients reported that they appreciated both  
378 this long-term insight into their disease pattern, and the ability to anticipate on an exacerbation. They  
379 also indicated that they gained more knowledge about their disease, they felt better prepared for a  
380 consultation, and felt less dependent on their HCP in handling their disease. Literature about self-  
381 monitoring in diabetes already showed that knowledge about the disease and self-monitoring are  
382 related<sup>10</sup>. Although some knowledge is a prerequisite for self-monitoring, the process of self-  
383 monitoring contributes to the further expansion of disease-related knowledge. Adequate disease-  
384 related knowledge is important, since it may influence patients' decisions regarding treatment,  
385 compliance, and self-management performance,<sup>28</sup> as well as the ability to recognize signs, symptoms,  
386 and patterns,<sup>10</sup> which is supported by a study about experiences with telehealth in patients with RA.<sup>29</sup>  
387 All of these aspects are essential in shared-decision making,<sup>30</sup> while also being beneficial to the  
388 efficiency of consultations. From the perspective of the HCP, it is important to give feedback to the  
389 patients about the results of self-monitoring during outpatient consultations, a fact that was  
390 emphasized by our study participants during the interviews. Those who had not received feedback  
391 about their PROM-values and/or disease activity course were less motivated to continue with the

L. Renskers, S.A.A. Rongen-van Dartel, A.M.P. Huis, and P.L.C.M. van Riel

392 program. The importance of feedback was emphasized in a study in which patients with early  
393 rheumatoid arthritis received visual feedback by their HCP about their disease progression. Compared  
394 to patients who received standard care, patients who received feedback showed significant differences  
395 regarding disease activity parameters.<sup>31</sup> Obtaining insight into the long-term disease activity course,  
396 and being able to anticipate on an exacerbation, might benefit the effectiveness of the delivered care  
397 as well. Patients will be able to respond to a deterioration in a timely manner and will have a greater  
398 chance to receive the care they need at the right time, resulting in a decrease of the cumulative disease  
399 activity. On the other hand, fewer consultations are possible if the disease activity is stable, which will  
400 eventually lead to less frequent outpatient visits. That reduction of health care costs can be obtained  
401 by introducing patient-report outcomes (PROs) in the follow-up was shown by a study on tele-health  
402 in RA. Patients received PRO-based health follow-up and were scheduled for telephone consultations  
403 by a rheumatologist or nurse. Similar results regarding disease control were found for the telehealth  
404 group compared with conventional follow-up.<sup>32</sup> Studies on self-monitoring in other chronic diseases  
405 have already proven its effectiveness, such as better control of blood glucose levels in diabetes,<sup>33 34</sup>  
406 reduction in mortality rates in heart failure,<sup>35 36</sup> reductions in blood pressure in hypertension,<sup>37 38</sup> and  
407 reductions in thromboembolic events in patients using anticoagulation therapy.<sup>39</sup> The effectiveness of  
408 self-monitoring resulted in a reduction in hospital readmissions in patients with hypertension, COPD  
409 and heart failure.<sup>40</sup> Patients in our study believed that self-monitoring could lead to a reduction in  
410 consultations, although they stressed the need and possibility for contacting the outpatient clinic when  
411 necessary. To our knowledge, there are no studies in IRDs on the efficiency of online remote self-  
412 monitoring of the disease activity by completing PROMs using an online program on reduction in  
413 consultations. Further research will therefore be needed.

414  
415 Barriers regarding online self-monitoring were mostly related to the functionality of the online  
416 monitoring system. Some patients experienced log-on problems, while others would like to have  
417 access in the system to more extensive information about their health status in general (e.g. blood test

L. Renskers, S.A.A. Rongen-van Dartel, A.M.P. Huis, and P.L.C.M. van Riel

1  
2  
3 418 results). Literature in the field of technology and innovations indicates that factors such as  
4  
5 419 compatibility, complexity, and relative advantage influence the adoption of new innovations.<sup>41</sup>  
6  
7 420 Therefore, a self-monitoring program should be comprehensible and user-friendly and preferably  
8  
9 421 integrated into an existing hospital system. In addition, we recommend screening patients on  
10  
11 422 motivation and computer skills and providing guided practice. We also recommend to let patients  
12  
13 423 choose their own preferred interval and PROM(s). Forcing patients to complete PROMs at predefined  
14  
15 424 intervals set by researchers does not support our idea of self-management and might impede patients'  
16  
17 425 motivation. Some patients chose for weekly self-assessment which might seem to be too frequent for  
18  
19 426 us as healthcare professionals. However, especially in an early or active phase of the disease, this  
20  
21 427 seems to be supportive for some patients. Despite experienced barriers, almost half of the participants  
22  
23 428 reached the end of the study, and the follow-up duration was almost one year. Since there was no real  
24  
25 429 'need' or urgency for self-monitoring in our study, as opposed to blood glucose monitoring in diabetes,  
26  
27 430 for example, reaching complete (100%) adherence was not a realistic option. Even so, adherence to  
28  
29 431 the predetermined PROM frequency was reasonably high. Sending reminders to fill in PROMs was  
30  
31 432 possibly related to these reasonably high rates, and was considered by the patients to be very useful.  
32  
33 433  
34  
35 434 By using qualitative methods we were able to examine the experiences and barriers that influence  
36  
37 435 participation in self-monitoring programs. This resulted in a thorough understanding of the concept of  
38  
39 436 self-monitoring, and guidance for further development. The main limitation of this study was the  
40  
41 437 selective, highly motivated study population. Because of the small study sample, it remains unclear  
42  
43 438 which percentage of the total population will be eligible for self-monitoring. However, the main  
44  
45 439 purpose was to gather experiences about self-monitoring, which were provided by the extensive  
46  
47 440 comments of the patients. Another limitation has to do with the purpose sampling technique, which  
48  
49 441 might have caused selection bias. With regard to difficulties in data interpretation in qualitative  
50  
51 442 research, it remains unclear if we did really grasp what patients were really thinking or feeling. Next to  
52  
53 443 this, the moderator was the main care provider for some patients which might have influenced their  
54  
55  
56  
57  
58  
59  
60

L. Renskers, S.A.A. Rongen-van Dartel, A.M.P. Huis, and P.L.C.M. van Riel

444 responses. Despite these limitations, we extensively and thoroughly discussed our data several times  
445 in order to identify the relevant categories and emerging themes regarding self-monitoring.

446

447 In the present study, patients were willing and able to self-monitor their disease. By monitoring their  
448 disease activity at home, they were involved in their own disease management and had individual  
449 control and responsibilities. During outpatient visits, patients might be better prepared to interact with  
450 their HCP, which will improve shared-decision making, contributing to the concept of personalized  
451 care. Self-monitoring – as a prerequisite of self-management – might benefit the cost-effectiveness of  
452 outpatient consultations. Efficiency gains are reflected in a reduction in the number of consultations  
453 without any increase in costs. At the same time, patient outcomes and patients' satisfaction should  
454 either remain stable or increase. This study is a first step toward personalized healthcare and involving  
455 the patient in decision making about their disease treatment. Findings from our study were used to  
456 implement a self-monitoring program at our outpatient clinic using the Integrated Electronic Patient  
457 Record from the hospital.

458 The present study showed the potential of self-monitoring as a first step toward disease self-  
459 management. Patients reported that they gained more knowledge, felt less dependent on their HCP,  
460 and most of them were able to monitor their disease. Therefore, we believe that self-monitoring can  
461 benefit the quality and efficiency of healthcare. Further research will be needed to confirm the cost-  
462 effectiveness of self-monitoring.

463

#### 464 **Acknowledgment**

465 The authors would like to thank the study participants and Jolanda van Haren (the second coder). They  
466 would also like to thank Pfizer for getting the opportunity to test iMonitor.

467

#### 468 **Contributors**

469 Study acquisition: PvR. Conception and design: all authors. Obtaining ethical approval: LR.

L. Renskers, S.A.A. Rongen-van Dartel, A.M.P. Huis, and P.L.C.M. van Riel

1  
2  
3 470 Qualitative data collection: LR pretested the topic guide. Focus group discussion: PvR functioned as  
4  
5 471 moderator and LR as observer. Telephone interviews were conducted by LR. Quantitative data  
6  
7 472 collection: PvR and SR (mainly clinical data), whereas LR obtained data derived from the self-  
8  
9 473 monitoring program. Qualitative data analysis: LR was involved as one of the coders during the coding  
10  
11 474 process, together with a research assistant. Provisional categorization of themes: LR and AH. Final  
12  
13 475 version of the categorization of themes and categories: all authors. Quantitative data analysis: all  
14  
15 476 authors. Writing: LR drafted the first version of the manuscript. PvR, AH and SR revised the manuscript.  
16  
17 477 The final manuscript has been seen and approved by all authors.  
18  
19  
20  
21  
22

23

### 479 **Conflicts of interest**

24  
25 480 This study was partly funded by Pfizer (pharmaceutical company). Pfizer was able to access data  
26  
27 481 available from iMonitor. Pfizer was not involved in any medical policy related to the study participants.  
28  
29

30

### 31 482

### 32 483 **Funding**

33  
34 484 This study was partly funded by Pfizer Medical and Educational Goods and Services.  
35  
36

37

### 38 485

### 39 486 **Ethics**

40  
41 487 The present study fulfills the Helsinki criteria and was approved by the Medical Ethical Committee of  
42  
43 488 the Radboud University Medical Center Nijmegen approved the study (2016-2435) and concluded that  
44  
45 489 no specific obligations were applicable to this research.  
46  
47

48 490

L. Renskers, S.A.A. Rongen-van Dartel, A.M.P. Huis, and P.L.C.M. van Riel

491 **Data**

492 Additional data is available from the corresponding author on reasonable request.

493

For peer review only

L. Renskers, S.A.A. Rongen-van Dartel, A.M.P. Huis, and P.L.C.M. van Riel

494 **References**

495

- 496 1. Crawford MJ, Rutter D, Manley C, et al. Systematic review of involving patients in the  
497 planning and development of health care. *BMJ* 2002;325(7375):1263.
- 498 2. Towle A, Bainbridge L, Godolphin W, et al. Active patient involvement in the education of  
499 health professionals. *Med Educ* 2010;44(1):64-74.
- 500 3. de Witt M, Berlo S, Aanerud G, et al. EULAR recommendations for the inclusion of patient  
501 representatives in scientific projects: A EULAR initiative. *Ann Rheum Dis* 2011;70:722-6.
- 502 4. Voshaar MJ, Nota I, van de Laar MA, et al. Patient-centred care in established rheumatoid  
503 arthritis. *Best Pract Res Clin Rheumatol* 2015;29(4-5):643-63.
- 504 5. Bodenheimer T, Lorig K, Holman H, et al. Patient self-management of chronic disease in  
505 primary care. *JAMA* 2002;288(19):2469-75.
- 506 6. Barlow J, Wright C, Sheasby J, et al. Self-management approaches for people with chronic  
507 conditions: a review. *Patient Educ Couns* 2002;48(2):177-87.
- 508 7. Kon AA. The shared decision-making continuum. *JAMA* 2010;304(8):903-04.
- 509 8. McKinstry B. Paternalism and the doctor-patient relationship in general practice. *Br J Gen  
510 Pract* 1992;42(361):340-42.
- 511 9. Wilde MH, Garvin S. A concept analysis of self-monitoring. *J Adv Nurs* 2007;57(3):339-50.
- 512 10. Song M, Lipman TH. Concept analysis: Self-monitoring in type 2 diabetes mellitus. *Int J Nurs  
513 Stud* 2008;45(11):1700-10.
- 514 11. van Riel P, Alten R, Combe B, et al. Improving inflammatory arthritis management through  
515 tighter monitoring of patients and the use of innovative electronic tools. *RMD Open*  
516 2016;2(2):e000302.
- 517 12. Gossec L, Paternotte S, Aanerud G, et al. Finalisation and validation of the rheumatoid  
518 arthritis impact of disease score, a patient-derived composite measure of impact of  
519 rheumatoid arthritis: a EULAR initiative. *Ann Rheum Dis* 2011;70(6):935-42.



L. Renskers, S.A.A. Rongen-van Dartel, A.M.P. Huis, and P.L.C.M. van Riel

- 1  
2  
3 520 13. Leeb BF, Haindl PM, Maktari A, et al. Patient-centered rheumatoid arthritis disease activity  
4  
5 521 assessment by a modified RADAI. *J Rheumatol* 2008;35(7):1294-9.  
6  
7 522 14. Welsing PMJ, Landewe RBM, van Riel PLCM, et al. The relationship between disease activity  
8  
9 523 and radiologic progression in patients with rheumatoid arthritis - A longitudinal analysis.  
10  
11 524 *Arthritis Rheum* 2004;50(7):2082-93. doi: 10.1002/art.20350  
12  
13  
14 525 15. Taal E, Riemsma RP, Brus HL, et al. Group education for patients with rheumatoid arthritis.  
15  
16 526 *Patient Educ Couns* 1993;20(2-3):177-87.  
17  
18 527 16. Prevoo M, van 't Hof MA, Kuper H, et al. Modified disease activity scores that include  
19  
20 528 twenty-eight-joint counts development and validation in a prospective longitudinal study of  
21  
22 529 patients with rheumatoid arthritis. *Arthritis Rheum* 1995;38(1):44-8.  
23  
24  
25 530 17. Smolen JS, Breedveld FC, Burmester GR, et al. Treating rheumatoid arthritis to target: 2014  
26  
27 531 update of the recommendations of an international task force. *Ann Rheum Dis* 2016;75(1):3-  
28  
29 532 15.  
30  
31  
32 533 18. Arnold E, Arnold W, Conaway D, et al. Physician Visits Create a Bottleneck in RA  
33  
34 534 Management: The Rheumatologist; 2015 [Available from: [https://www.the-](https://www.the-rheumatologist.org/article/rheumatoid-arthritis-practice-performance-project-spots-problems-in-ra-management/)  
35  
36 535 [rheumatologist.org/article/rheumatoid-arthritis-practice-performance-project-spots-](https://www.the-rheumatologist.org/article/rheumatoid-arthritis-practice-performance-project-spots-problems-in-ra-management/)  
37  
38 536 [problems-in-ra-management/](https://www.the-rheumatologist.org/article/rheumatoid-arthritis-practice-performance-project-spots-problems-in-ra-management/)] accessed 25 February 2019.  
39  
40  
41 537 19. Jain VK, Negi VS. Inflammatory rheumatic diseases in the elderly. *Indian J Rheumatol*  
42  
43 538 2016;11(4):207.  
44  
45  
46 539 20. Hendrikx J, Fransen J, van Riel PL. Monitoring rheumatoid arthritis using an algorithm based  
47  
48 540 on patient-reported outcome measures: a first step towards personalised healthcare. *RMD*  
49  
50 541 *Open* 2015;1(1):e000114.  
51  
52 542 21. El Miedany Y. PROMs in inflammatory arthritis: moving from static to dynamic. *Clin*  
53  
54 543 *Rheumatol* 2013;32(6):735-42. doi: 10.1007/s10067-013-2228-0.  
55  
56  
57 544 22. Calvert M, Kyte D, Price G, et al. Maximising the impact of patient reported outcome  
58  
59 545 assessment for patients and society. *BMJ* 2019;364:k5267.  
60

L. Renskers, S.A.A. Rongen-van Dartel, A.M.P. Huis, and P.L.C.M. van Riel

- 1  
2  
3 546 23. Aletaha D, Neogi T, Silman AJ, et al. 2010 rheumatoid arthritis classification criteria: an  
4  
5 547 American College of Rheumatology/European League Against Rheumatism collaborative  
6  
7 548 initiative. *Arthritis Rheum* 2010;62(9):2569-81.  
8  
9  
10 549 24. Kelyon. What is iMonitor? 2018 [Available from:  
11  
12 550 <http://www.kelyon.com/en/project/imonitor>] accessed 11<sup>th</sup> July 2019.  
13  
14 551 25. Flottorp SA, Oxman AD, Krause J, et al. A checklist for identifying determinants of practice: a  
15  
16 552 systematic review and synthesis of frameworks and taxonomies of factors that prevent or  
17  
18 553 enable improvements in healthcare professional practice. *Implement Sci* 2013;8(1):35.  
19  
20  
21 554 26. Pope C, Ziebland S, Mays N. Qualitative research in health care: analysing qualitative data.  
22  
23 555 *BMJ* 2000;320(7227):114.  
24  
25 556 27. Tong A, Sainsbury P, Craig J. Consolidated criteria for reporting qualitative research (COREQ):  
26  
27 557 a 32-item checklist for interviews and focus groups. *Int J Qual Health Care* 2007;19(6):349-  
28  
29 558 357.  
30  
31  
32 559 28. Barlow J, Wright C. Knowledge in patients with rheumatoid arthritis: a longer term follow-up  
33  
34 560 of a randomized controlled study of patient education leaflets. *Br J Rheumatol*  
35  
36 561 1998;37(4):373-76.  
37  
38  
39 562 29. Knudsen LR, De Thurah A, Lomborg K. Experiences With Telehealth Followup in Patients With  
40  
41 563 Rheumatoid Arthritis: A Qualitative Interview Study. *Arthritis Care Res (Hoboken)*  
42  
43 564 2018;70(9):1366-72.  
44  
45 565 30. Joseph-Williams N, Elwyn G, Edwards A. Knowledge is not power for patients: a systematic  
46  
47 566 review and thematic synthesis of patient-reported barriers and facilitators to shared decision  
48  
49 567 making. *Patient Educ Couns* 2014;94(3):291-309.  
50  
51  
52 568 31. El Miedany Y, El Gaafary M, Palmer D. Assessment of the utility of visual feedback in the  
53  
54 569 treatment of early rheumatoid arthritis patients: a pilot study. *Rheumatol Int*  
55  
56 570 2012;32(10):3061-68.  
57  
58  
59  
60

L. Renskers, S.A.A. Rongen-van Dartel, A.M.P. Huis, and P.L.C.M. van Riel

- 1  
2  
3 571 32. De Thurah A, Stengaard-Pedersen K, Axelsen M, et al. Tele-Health Followup Strategy for Tight  
4  
5 572 Control of Disease Activity in Rheumatoid Arthritis: Results of a Randomized Controlled Trial.  
6  
7 573 Arthritis Care Res (Hoboken) 2018;70(3):353-60.  
8  
9  
10 574 33. Poolsup N, Suksomboon N, Rattanasookchit S. Meta-analysis of the benefits of self-  
11  
12 575 monitoring of blood glucose on glyceimic control in type 2 diabetes patients: an update.  
13  
14 576 Diabetes Technol Ther 2009;11(12):775-84.  
15  
16 577 34. Hunt CW. Technology and diabetes self-management: an integrative review. World J  
17  
18 578 Diabetes 2015;6(2):225.  
19  
20  
21 579 35. Nakamura N, Koga T, Iseki H. A meta-analysis of remote patient monitoring for chronic heart  
22  
23 580 failure patients. J Telemed Telecare 2014;20(1):11-17.  
24  
25 581 36. Conway A, Inglis SC, Clark RA. Effective technologies for noninvasive remote monitoring in  
26  
27 582 heart failure. Telemed J E Health 2014;20(6):531-38.  
28  
29  
30 583 37. Bray EP, Holder R, Mant J, et al. Does self-monitoring reduce blood pressure? Meta-analysis  
31  
32 584 with meta-regression of randomized controlled trials. Ann Med 2010;42(5):371-86.  
33  
34 585 38. Uhlig K, Patel K, Ip S, et al. Self-measured blood pressure monitoring in the management of  
35  
36 586 hypertension: a systematic review and meta-analysis. Ann Intern Med 2013;159(3):185-94.  
37  
38  
39 587 39. Heneghan C, Ward A, Perera R, et al. Self-monitoring of oral anticoagulation: systematic  
40  
41 588 review and meta-analysis of individual patient data. Lancet 2012;379(9813):322-34.  
42  
43 589 40. McBain H, Shipley M, Newman S. The impact of self-monitoring in chronic illness on  
44  
45 590 healthcare utilisation: a systematic review of reviews. BMC Health Serv Res 2015;15(1):565.  
46  
47  
48 591 41. Rogers EM. Diffusion of innovations: Simon and Schuster 2010.  
49  
50  
51 592  
52  
53  
54 593  
55  
56  
57  
58  
59  
60

L. Renskers, S.A.A. Rongen-van Dartel, A.M.P. Huis, and P.L.C.M. van Riel

594 **Figure legends**

595 **Figure 1:**

596 *Y-axis: 47 patients who participated in the self-monitoring program, each line represents a patient; X-axis: days*  
597 *since start of study (different start days possible for patients)*

598

599 **Figure 2:**

600 *DAS28: Disease Activity Score 28; PROM: Patient-Reported Outcome Measure; RADAI-5: Rheumatoid Arthritis*  
601 *Disease Activity Index-5; RAID: Rheumatoid Arthritis Impact of Disease.*

602 *Above: good congruence between PROM-values and DAS28-scores. Below: poor congruence between PROM-*  
603 *values and DAS28-scores*

604 *Poor: DAS28 course and PROM scores show opposite direction; Good: DAS28 course and the PROM scores show*  
605 *the same direction*

Figure 1. Follow-up duration in days of the 47 iMonitor participants

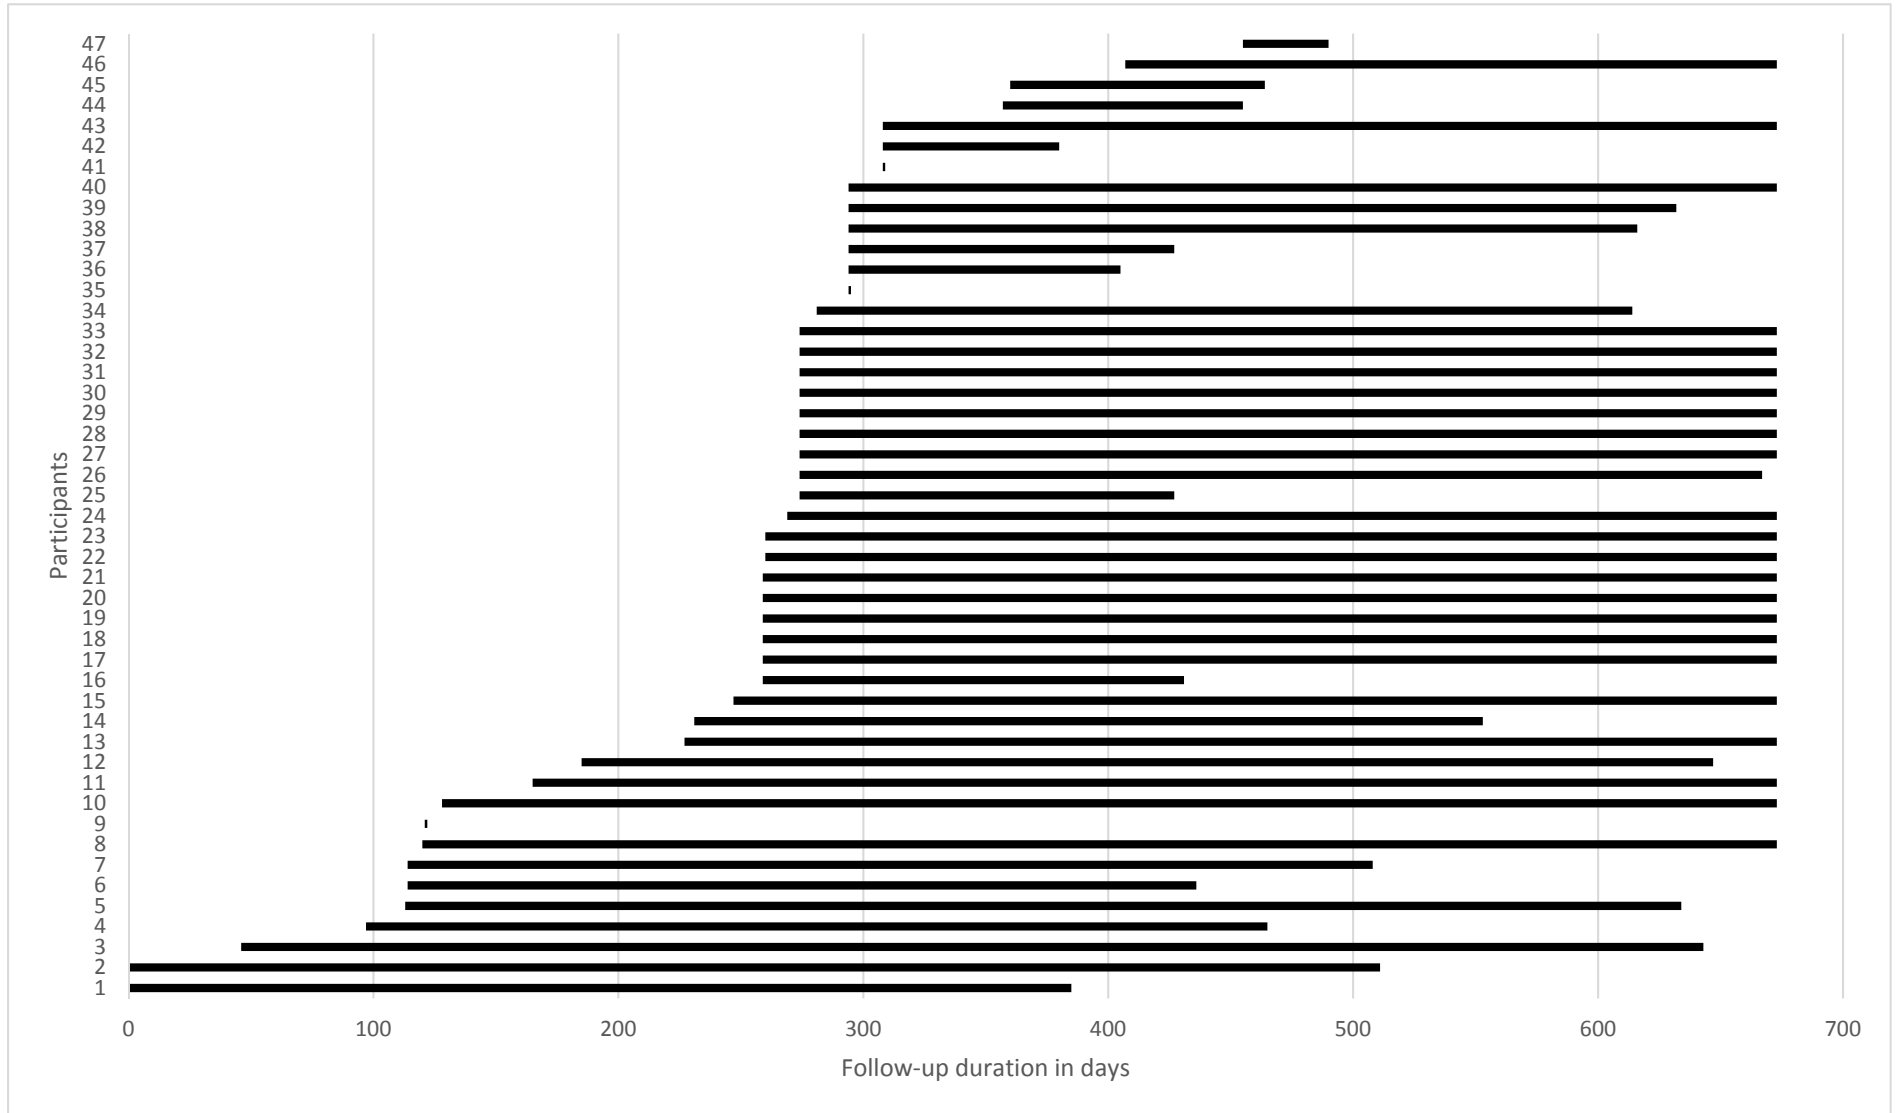

Y-axis: 47 patients who participated in the self-monitoring program, each line represents a patient; X-axis: days since start of study (different start days possible for patients)

Figure 2. Example of a positive (above) and negative (below) rating regarding the agreement between the PROMs and DAS28 course

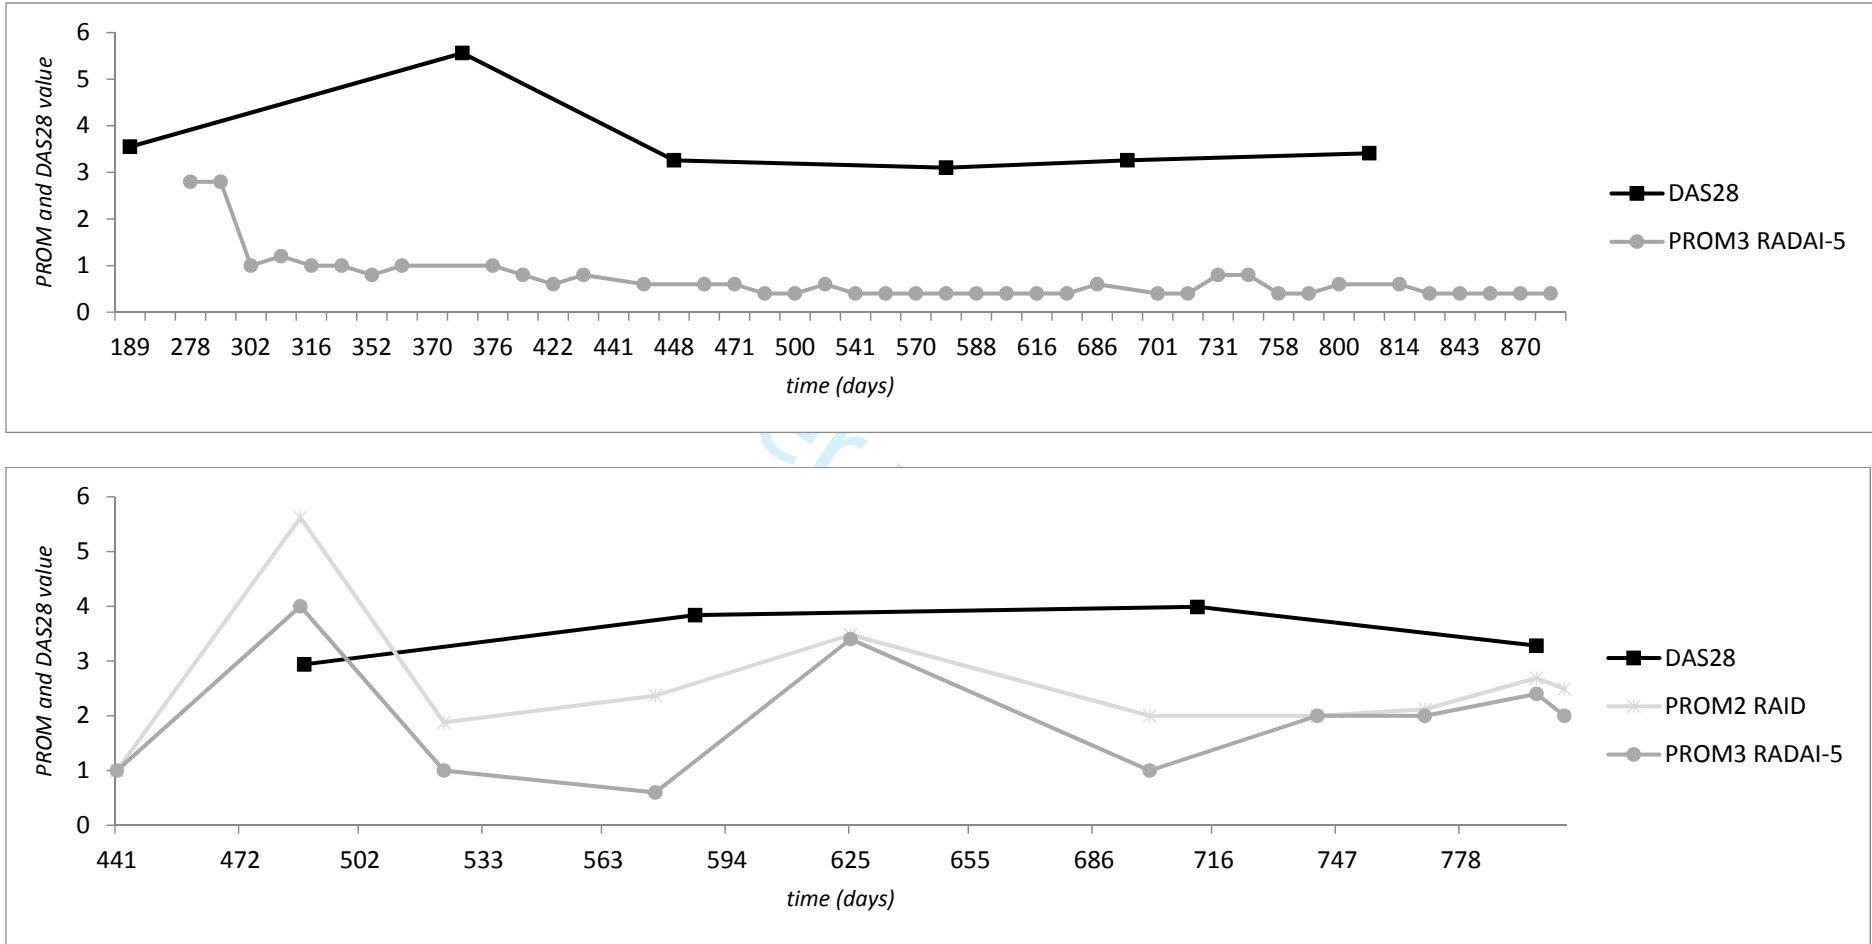

DAS28: Disease Activity Score 28; PROM: Patient-Reported Outcome Measure; RADAI-5: Rheumatoid Arthritis Disease Activity Index-5; RAID: Rheumatoid Arthritis Impact of Disease.

Above: good congruence between PROM-values and DAS28-scores. Below: poor congruence between PROM-values and DAS28-scores

Poor: DAS28 course and PROM scores show opposite direction; Good: DAS28 course and the PROM scores show the same direction

## Appendix

Topic guide: "Patients' experiences regarding online self-monitoring of the disease course"

### Guideline related factors

1. Which elements of the program are useful in your opinion, and why? Which are not useful, and why?
2. On what devices are you using the program?
3. What are your experiences with using iMonitor on these devices?
4. What do you think about the lay-out of iMonitor?
5. What do you think about the lay-out of de questionnaires/PROMs?
6. Do you encounter any technical problems while using iMonitor? If yes, which problems have occurred?
7. How did you experience creating a password?

### Patient related factors

#### Motivation

8. For what specific reasons do you use the program?
9. What do you think are the benefits of using iMonitor?
10. Are there any reasons why you should not use the program?

#### Needs

11. To what specific needs does iMonitor comply?

#### Skills

12. Which skills are needed to use iMonitor properly according to you?
13. Do you have those skills?

#### Self-efficacy

14. Do you think you are capable to use iMonitor correctly? Why?

#### Adherence

You received an email-alert in case a PROM/PROMs could be completed.

15. What are your experiences with receiving those alerts?
16. What do you think about the idea of receiving alerts?
17. To what extent do these email-alerts activate you to complete the PROM/PROMs?

1  
2  
3  
4  
5 Social support

6 18. Are you supported by others (family, friends, peers) regarding the use of iMonitor?

7  
8 If yes: who and to what extent?

9  
10 19. Do you talk with others about iMonitor? If yes, who?

11  
12 20. How do you feel about receiving that social support?

13  
14  
15 Professional interaction

16 21. Do you/did you discuss the use of iMonitor with your rheumatologist or nurse specialist?

17  
18 22. If yes, how do you/did you feel about that?

19  
20 23. In case you attended the instruction class: What is your opinion about this instruction class?

21  
22  
23 Incentives and resources

24  
25 Incentives/stimuli

26 24. In case you kept using the program: what made you keep using the program?

27  
28 25. Which additional value do you experience by using iMonitor?



1  
2  
3 Knowledge

4  
5 26. Do you gain more knowledge by using the program?

- 6  
7 a. If yes, how and to what extent?  
8  
9 b. If no, why not?

10  
11  
12 Time investment

13  
14 27. What do you think about the time investment needed in order to use iMonitor?

15  
16  
17 Capacity for organizational change

18  
19 28. Do you think that using iMonitor could contribute to a reduction in the number of outpatient  
20 consultations, and why? Or why not?

21  
22 29. Do you have any recommendations in order to recruit more patients?

23  
24  
25 Social, political and legal factors

26  
27 30. How do you think about the privacy standards regarding the use of iMonitor?

28  
29 31. Have there been any issues you needed to solve?

30  
31  
32 Any additional information you want to share with us? Any comments or suggestions?  
33  
34  
35  
36  
37  
38  
39  
40  
41  
42  
43  
44  
45  
46  
47  
48  
49  
50  
51  
52  
53  
54  
55  
56  
57  
58  
59  
60

# BMJ Open

## Patients' experiences regarding self-monitoring of the disease course: an observational pilot study in patients with Inflammatory Rheumatic Diseases

|                                 |                                                                                                                                                                                                                                                                                           |
|---------------------------------|-------------------------------------------------------------------------------------------------------------------------------------------------------------------------------------------------------------------------------------------------------------------------------------------|
| Journal:                        | <i>BMJ Open</i>                                                                                                                                                                                                                                                                           |
| Manuscript ID                   | bmjopen-2019-033321.R2                                                                                                                                                                                                                                                                    |
| Article Type:                   | Original research                                                                                                                                                                                                                                                                         |
| Date Submitted by the Author:   | 20-Mar-2020                                                                                                                                                                                                                                                                               |
| Complete List of Authors:       | Renskers, Lianne; Radboudumc, IQ healthcare<br>Rongen-van Dartel, Sanne; Radboudumc, IQ healthcare; Bernhoven Hospital Location Uden, Rheumatology<br>Huis, Anita; Radboudumc, IQ healthcare<br>van Riel, Piet; Radboudumc, IQ healthcare; Bernhoven Hospital Location Uden, Rheumatology |
| <b>Primary Subject Heading</b>: | Rheumatology                                                                                                                                                                                                                                                                              |
| Secondary Subject Heading:      | Qualitative research, Rheumatology, Patient-centred medicine                                                                                                                                                                                                                              |
| Keywords:                       | RHEUMATOLOGY, QUALITATIVE RESEARCH, EDUCATION & TRAINING (see Medical Education & Training)                                                                                                                                                                                               |
|                                 |                                                                                                                                                                                                                                                                                           |

SCHOLARONE™  
Manuscripts

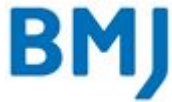

I, the Submitting Author has the right to grant and does grant on behalf of all authors of the Work (as defined in the below author licence), an exclusive licence and/or a non-exclusive licence for contributions from authors who are: i) UK Crown employees; ii) where BMJ has agreed a CC-BY licence shall apply, and/or iii) in accordance with the terms applicable for US Federal Government officers or employees acting as part of their official duties; on a worldwide, perpetual, irrevocable, royalty-free basis to BMJ Publishing Group Ltd ("BMJ") its licensees and where the relevant Journal is co-owned by BMJ to the co-owners of the Journal, to publish the Work in this journal and any other BMJ products and to exploit all rights, as set out in our [licence](#).

The Submitting Author accepts and understands that any supply made under these terms is made by BMJ to the Submitting Author unless you are acting as an employee on behalf of your employer or a postgraduate student of an affiliated institution which is paying any applicable article publishing charge ("APC") for Open Access articles. Where the Submitting Author wishes to make the Work available on an Open Access basis (and intends to pay the relevant APC), the terms of reuse of such Open Access shall be governed by a Creative Commons licence – details of these licences and which [Creative Commons](#) licence will apply to this Work are set out in our licence referred to above.

Other than as permitted in any relevant BMJ Author's Self Archiving Policies, I confirm this Work has not been accepted for publication elsewhere, is not being considered for publication elsewhere and does not duplicate material already published. I confirm all authors consent to publication of this Work and authorise the granting of this licence.

L. Renskers, S.A.A. Rongen-van Dartel, A.M.P. Huis, and P.L.C.M. van Riel

**1 Full title**

2 Patients' experiences regarding self-monitoring of the disease course: an observational pilot study in  
3 patients with Inflammatory Rheumatic Diseases

**5 Author names and ORCID ID numbers**

6 Lianne Renskers (0000-0003-1413-1629)

7 Sanne Rongen-van Dartel (0000-0002-2536-0024)

8 Anita Huis (0000-0003-1144-163X)

9 Piet van Riel (0000-0001-7719-8906)

**11 Keywords**

12 Rheumatoid Arthritis; Spondyloarthritis; Patient Perspective; Psoriatic Arthritis; Qualitative research

**14 Institution**

15 Radboud university medical center, Radboud Institute for Health Sciences

16 IQ healthcare

17 Geert Grooteplein 21

18 PO Box 9101 (114)

19 6500 HB Nijmegen

20 The Netherlands

21 Telephone number: (0031) 24 36 15305

**23 Author affiliations**

24 L. Renskers<sup>1</sup>, MSc., S.A.A. Rongen- van Dartel<sup>1,2</sup>, PhD., A.M.P. Huis<sup>1</sup>, PhD., P.L.C.M. van Riel<sup>1,2</sup>, MD,  
25 PhD.

26 <sup>1</sup>Radboud university medical center, Radboud Institute for Health Sciences, IQ healthcare, Nijmegen,  
27 the Netherlands, <sup>2</sup>Bernhoven, Department of Rheumatology, Uden

**29 Corresponding author**

30 Lianne Renskers, MSc.

31 Radboud university medical center

32 Scientific Center for Quality of Healthcare (IQ healthcare)

33 PO Box 9101 (114)

34 6500 HB Nijmegen, The Netherlands

L. Renskers, S.A.A. Rongen-van Dartel, A.M.P. Huis, and P.L.C.M. van Riel

Telephone number: (0031) 24 36 10329 – E-mail address: lisanne.renskers@radboudumc.nl

## Abstract

**Objectives.** Self-monitoring the disease course is a relatively new concept in the management of patients with Inflammatory Rheumatic Diseases (IRDs). The aims of this pilot study were to obtain patients' experiences with online self-monitoring, to assess information about the agreement between the disease course assessed with Patient Reported Outcome Measures (PROMs) and an objectively measured Disease Activity Score by the rheumatologist (DAS28), and to assess adherence to predetermined PROM frequency intervals.

**Design.** Observational study using qualitative and quantitative methods.

**Setting.** The rheumatology outpatient clinic of a teaching hospital in the Netherlands (secondary care).

**Participants:** 47 Patients with an IRD who regularly attended the outpatient clinic.

**Methods.** Patients completed PROMs by using an online self-monitoring program. Their experiences regarding self-monitoring were qualitatively assessed through a focus group discussion and telephone interviews using a thematic analysis approach. Adherence to the predefined PROM frequency (completed PROM assessments within the predetermined frequency) and the agreement between the DAS28 course and PROM values (Rheumatoid Arthritis Disease Activity Index-5 (RADAI-5) and the Rheumatoid Arthritis Impact of Disease (RAID)) were quantitatively assessed using descriptives.

**Results.** Forty-seven patients participated, most of them diagnosed with RA (n = 38, 80.9%). Three themes were identified: knowledge about and insight into disease (activity), patient-professional interaction, and functionality of the program. Mean adherence to the predetermined PROM frequency was 68.1%. The RAID showed the best agreement with the DAS28 course. Mean participation time was 350 days.

L. Renskers, S.A.A. Rongen-van Dartel, A.M.P. Huis, and P.L.C.M. van Riel

1  
2  
3 61  
4  
5 62 Conclusion. Patients were predominantly positive about online self-monitoring. They indicated that  
6  
7 63 they gained more knowledge about their disease, felt less dependent on the healthcare professional,  
8  
9 64 and valued the insight into their long-term disease course. Barriers were mostly related to technical  
10  
11 65 factors. Patients were able to and willing to self-monitor their disease, which could contribute to a  
12  
13 66 more efficient allocation of outpatient consultations in the future.  
14  
15  
16  
17 67  
18  
19 68  
20  
21  
22  
23  
24  
25  
26  
27  
28  
29  
30  
31  
32  
33  
34  
35  
36  
37  
38  
39  
40  
41  
42  
43  
44  
45  
46  
47  
48  
49  
50  
51  
52  
53  
54  
55  
56  
57  
58  
59  
60

For peer review only

L. Renskers, S.A.A. Rongen-van Dartel, A.M.P. Huis, and P.L.C.M. van Riel

69 **Article summary**

70

71 Strengths and limitations of this study:

72

- 73 • A strength of this study is the use of both qualitative and quantitative research methods,  
74 providing a rich description of factors associated with self-monitoring
- 75 • Patients were closely involved during the development stage, execution, and evaluation  
76 stage of this study
- 77 • Using validated Patient Reported Outcome Measures (PROMs) assessing disease activity and  
78 disease impact allowed us to compare these PROM scores with objective, health professional  
79 assessed scores
- 80 • Due to the selective and small study population it is not clear which percentage of the total  
81 population with IRD is willing to and able to self-monitor the disease course

82

L. Renskers, S.A.A. Rongen-van Dartel, A.M.P. Huis, and P.L.C.M. van Riel

## 83 Introduction

84 In chronic care, there is a tendency toward personalized healthcare. Patients have become more  
85 empowered and are increasingly involved in the planning and development of healthcare.<sup>1-4</sup> There is a  
86 shift from a paternalistic model (in which the doctor is dominant and believes that patients need to be  
87 guided through the decision making process) to a shared-decision making model (in which doctor and  
88 patient make mutual, collaborative decisions). This shift requires an engaged patient who takes  
89 responsibilities regarding day-to-day disease management.<sup>5-8</sup> As a result of this shift, new roles for  
90 both patients and healthcare professionals (HCPs) have arisen. An example of what this new role  
91 entails for a patient is self-monitoring, in which a patient undertakes self-measurement of vital signs,  
92 symptoms, behavior, or psychological well-being through Patient-Reported Outcome Measures  
93 (PROMs).<sup>9-10</sup> In some patients with Inflammatory Rheumatic Diseases (IRDs) such as Rheumatoid  
94 Arthritis (RA), Psoriatic Arthritis (PsA), or Ankylosing Spondylitis (AS), self-monitoring may gradually  
95 replace the traditional monitoring by HCPs.<sup>11</sup> Examples of disease-specific and validated PROMs in IRDs  
96 that can be used in self-monitoring are the Rheumatoid Arthritis Impact of Disease<sup>12-13</sup> (RAID), which  
97 measures disease impact, and the Rheumatoid Arthritis Disease Activity Index-5<sup>14-16</sup> (RADAI-5), which  
98 measures disease activity. An example of a general or non-specific PROM is the Health Assessment  
99 Questionnaire (HAQ), measuring functional status.

100 There are however also other reasons why self-monitoring in patients with IRD has gained  
101 more interest. Usual care in patients with IRDs is primarily aimed at suppressing disease activity, in  
102 order to prevent structural damage.<sup>17-18</sup> The disease activity can be measured using a composite index,  
103 the Disease Activity Score using 28 joint counts<sup>19</sup>, which measures tender and swollen joint counts,  
104 acute phase response, and a patient's general health assessment. The Treat-to-Target Task Force  
105 recommends rheumatologists to monthly assess patients with moderate or high disease activity, and  
106 patients with controlled and low disease activity every three to six months.<sup>20</sup> In practice, however,  
107 these frequencies are not always met for various reasons. This strategy causes time constraints and a  
108 growing workload among rheumatologists, making it not manageable for all rheumatologists to comply



L. Renskers, S.A.A. Rongen-van Dartel, A.M.P. Huis, and P.L.C.M. van Riel

1  
2  
3 109 fully to the frequent assessments.<sup>21</sup> Another reason is connected to the aging population. The number  
4  
5 110 and proportion of patients with IRDs aged 65 and over will increase in the near future.<sup>22</sup> Self-  
6  
7 111 monitoring of the disease course using disease-specific PROMs such as RAID or RADAI-5 could prove  
8  
9 112 to be a solution in diminishing the number of consultations.<sup>23</sup> As disease activity can only be objectively  
10  
11 113 assessed during outpatient consultations, it remains unclear what happens to the disease activity in-  
12  
13 114 between consultations. Fluctuations and peaks in disease activity are easily missed or they remain  
14  
15 115 unnoticed, which could have disastrous consequences regarding joint damage.<sup>17</sup> Self-monitoring might  
16  
17 116 also give a better insight into these fluctuations of disease activity in-between outpatient clinical  
18  
19 117 consultations. Moreover, some patients visit their rheumatologist while their disease activity is under  
20  
21 118 control, thereby contributing to unnecessary outpatient consultations. Summarizing, self-monitoring  
22  
23 119 of disease activity in IRDs as a first step toward personalized healthcare enables patients as well as  
24  
25 120 HCPs to get insight into the disease activity course over time. Moreover, it may lead to a more  
26  
27 121 consistent reporting in the long term and may contribute to optimizing the number, timing, and  
28  
29 122 efficiency of consultations.<sup>11,23</sup> By completing PROMs, patients who need further medical attention can  
30  
31 123 be identified and receive additional medical attention. Moreover, completion of a PROM will help a  
32  
33 124 patient to prepare for a visit and it could improve the communication between physician and patient.<sup>24</sup>  
34  
35  
36  
37  
38

39 125 <sup>25</sup>

40  
41 126 In the present study an online self-monitoring program was pilot-tested in order to test the  
42  
43 127 feasibility of self-monitoring before implementation of a self-monitoring program in daily clinical  
44  
45 128 practice. The aims of this study were to obtain patients' experiences regarding online self-monitoring,  
46  
47 129 to assess the agreement between the disease course assessed with disease-specific PROMs (RAID and  
48  
49 130 RADAI-5) and an objectively measured disease activity score (DAS28) by the rheumatologist, and to  
50  
51 131 assess the adherence to predetermined PROM frequency intervals.  
52  
53  
54  
55  
56  
57  
58  
59  
60

132

L. Renskers, S.A.A. Rongen-van Dartel, A.M.P. Huis, and P.L.C.M. van Riel

1  
2  
3 133 **Methods**

4  
5 134 *Study design*

6  
7 135 This observational pilot study using quantitative and qualitative research methods, was conducted at  
8  
9 136 a teaching hospital in Uden (the Netherlands) at the rheumatology outpatient clinic from 6 July 2015  
10  
11 137 until 9 May 2017.

12  
13  
14 138  
15  
16 139 *Inclusion criteria*

17  
18 140 In order to be eligible for this study, patients had to be diagnosed with an IRD according to the  
19  
20 141 ACR/EULAR criteria.<sup>26</sup> Furthermore, they needed to have an electronic device (laptop/PC, tablet or  
21  
22 142 Smartphone) with access to the Internet, and they needed to be able to sufficiently read and write  
23  
24 143 Dutch. Patient inclusion started in July 2015 and we included the last patient in October 2016.  
25  
26 144

27  
28  
29 145 *Follow-up duration*

30  
31 146 Patients were able to withdraw from the program at any time point. We defined early study  
32  
33 147 termination in two manners: when a patient reported to withdraw from the self-monitoring program,  
34  
35 148 this was evaluated as the end date. Some patients did not report dropping out of the study but did  
36  
37 149 stop completing PROM(s). End of study in these cases was set by adding the interval time to the date  
38  
39 150 the last PROM was filled in. For example, a patient with a four-week PROM frequency (28 days)  
40  
41 151 completed the last PROM on 1 March 2017. For this patient, end of study date was set on 29 March  
42  
43 152 2017.  
44  
45 153

46  
47  
48 154 *Self-monitoring program*

49  
50 155 iMonitor, the online self-monitoring program tested in this study, was developed by Pfizer.<sup>27</sup> The  
51  
52 156 program was accessible through a laptop, tablet or Smartphone by filling in a user name, password,  
53  
54 157 and pin code. The program complied with the required privacy standards. Because the program was  
55  
56 158 intended to stimulate patient involvement, personalized healthcare and patient self-management,  
57  
58  
59  
60

L. Renskers, S.A.A. Rongen-van Dartel, A.M.P. Huis, and P.L.C.M. van Riel

159 patients selected their preferred PROM(s) and PROM frequency (one-, two-, four-, six- or eight-weekly)  
160 in advance and the system generated an email-alert for filling in a PROM (or PROMs) accordingly.  
161 Patients were able to complete one or more PROMs within a timeframe of 24 hours. They could send  
162 a message to the HCPs in case of questions or notifications by using the message option. In case of  
163 urgent matters, they could contact the outpatient clinic by telephone.

164

#### 165 *Patient-Reported Outcome Measures (PROMs)*

166 Available disease-specific PROMs for patients with RA were the RAID and the RADAI-5, measuring  
167 disease impact (0-10; 10 = severe impact of disease activity) and disease activity (0-10; 10 = severe  
168 disease activity). Patients with AS could fill in the disease-specific Bath Ankylosing Spondylitis Disease  
169 Activity Index (BASDAI), measuring disease activity (0-10; 10 = severe disease activity), and/or the Bath  
170 Ankylosing Spondylitis Functional Index (BASFI), measuring physical function (0-10; 10 = severe  
171 functional limitation). The HAQ, general PROM that measures physical function, was available for all  
172 patients (0-3; 3 = severe disability). Patients could opt to assess one to three PROMs. Completion of all  
173 PROMs took about 5 minutes. After completion, the PROM scores were subsequently displayed in a  
174 graph. Additionally, DAS28 scores (0-10; remission:  $DAS28 < 2.6$ , low disease activity:  $\geq 2.6$   $DAS28 < 3.2$ ,  
175 moderate disease activity:  $\geq 3.2$   $DAS28 \leq 5.1$ , high disease activity:  $DAS28 > 5.1$ ) could be added to the  
176 graph by the HCP. These DAS28 scores were obtained by the HCPs during outpatient consultations and  
177 were kept in the electronic medical files from the hospital.

178

#### 179 *Procedure - Recruitment*

180 Patients were informed about this pilot study and recruited in several ways. Firstly, we used purposive  
181 sampling: rheumatologists themselves asked possible suitable patients to participate during  
182 outpatient consultations during the entire study period. Secondly, during general information  
183 meetings at the hospital, patients were informed about the study and were able to sign up. Lastly,  
184 leaflets about the study were available in the waiting room and patients were informed about the

L. Renskers, S.A.A. Rongen-van Dartel, A.M.P. Huis, and P.L.C.M. van Riel

185 study through the hospital's website. Patients received a manual containing information regarding  
186 access to and use of the program. However, a substantial number needed additional training, which  
187 was provided by instruction classes. After patients had been instructed how to use the program, they  
188 could indicate which PROM(s) they preferred to fill in by showing them the paper versions. Moreover,  
189 they were asked to indicate their desired frequency option. Patients who agreed to take part in the  
190 study were asked to sign a consent form. During the regular outpatient consultations, rheumatologists  
191 were expected to provide feedback to the patient about the patient's disease course and PROM  
192 results.

193

#### 194 *Data collection and analysis*

##### 195 Quantitative methods

##### 196     ▪ Adherence and agreement

197 Firstly, we determined adherence to the predetermined PROM frequency by assessing whether a  
198 patient had completed (yes or no) the PROM(s) in the predetermined time interval. Adherence was  
199 calculated as the number of completed assessments by the patient divided by the number of PROM  
200 assessments that should have been completed according to the chosen interval of the patient times  
201 100%. For example, a patient with a weekly PROM frequency participated for one year. This patient  
202 should have received 52 email-alerts, so 52 PROM assessments should have been completed. This  
203 patient completed 40 PROM assessments, so adherence is  $(40/52*100 = )$  76.9%. Secondly, we  
204 determined the agreement between the DAS28 course and PROM values. Two researchers (LR and  
205 PvR) independently assessed agreement by comparing the DAS28 course with the corresponding  
206 PROM-value(s) from the RAID and/or RADAI-5 using two categories (poor and good) and discussed  
207 discrepancies. The RAID and the RADAI-5 were used, because these two disease-specific PROMs  
208 measure disease impact and activity, whereas the HAQ is non-disease specific. 'Good' was used in  
209 cases where the DAS28 course and the PROM scores showed the same direction (i.e. the DAS28 course  
210 increased and PROM scores as well). 'Poor' was used in cases where the DAS28 course and PROM

L. Renskers, S.A.A. Rongen-van Dartel, A.M.P. Huis, and P.L.C.M. van Riel

1  
2  
3 211 scores showed opposite directions (the DAS28 course increased and PROM scores decreased (or the  
4  
5 212 other way around). Data from patients with at least three PROM values (falling within a fourteen-day-  
6  
7 213 window with DAS28 assessment) were assessed.  
8  
9

10 214

11 215 Qualitative methods

12 216 Patients' experiences with the self-monitoring program were obtained via a focus group and semi-  
13  
14 217 structured interviews. The purpose of the focus group and interviews was to gain insight into relevant  
15  
16 218 factors that might hinder or facilitate patients using the self-monitoring program. The checklist from  
17  
18 219 Flottorp et al.<sup>28</sup> served as an inspiration for a semi-structured topic guide (see appendix). Relevant  
19  
20 220 domains for our topic guide were: program factors; patient factors; professional-patient interaction  
21  
22 221 factors; and resources. Prior to the start of the focus group discussion we conducted a telephone  
23  
24 222 interview with one patient to check the appropriateness of the topic guide and to check whether the  
25  
26 223 questions were clear. During the focus group discussion, an experienced moderator (PvR) guided the  
27  
28 224 discussion. Patients unable to attend the focus group were interviewed by telephone, using the same  
29  
30 225 topic guide. All participating patients had at least six months experience with the self-monitoring  
31  
32 226 program.  
33  
34  
35  
36  
37  
38

39 227

40 228 *Qualitative analysis*

41 229 The interviews and focus group discussion were recorded. The recordings were and transcribed ad  
42  
43 230 verbum by an independent agency. One of the researchers (LR) and a research assistant independently  
44  
45 231 coded the transcripts to increase intercoder reliability. They used the method 'thematic analysis' in  
46  
47 232 which the codes were derived from the data with the purpose to describe relevant factors regarding  
48  
49 233 self-monitoring and to identify categories and themes. A constant comparative method was used for  
50  
51 234 the analysis of the emerging themes. Any discrepancies in the analysis were discussed until consensus  
52  
53 235 was reached<sup>29</sup>. Afterwards, two researchers (LR and AH) agreed on a provisional categorization and  
54  
55 236 overarching themes. These categories and overarching themes were also discussed with a third and  
56  
57  
58  
59  
60

L. Renskers, S.A.A. Rongen-van Dartel, A.M.P. Huis, and P.L.C.M. van Riel

237 fourth researcher (SR and PvR). The COnsolidated criteria for REporting Qualitative research (COREQ)  
238 checklist<sup>30</sup> was mainly used as guidance for the reporting of our qualitative research. We conducted  
239 coding and analysis by using a qualitative software program (Atlas.ti).

240

#### 241 *Patient and public involvement*

242 Firstly, patient involvement was needed during the establishment of the topic guide, which was pre-  
243 tested among one patient in order to check if the questions were comprehensible and clear. Secondly,  
244 patients were encouraged to give suggestions and comments regarding the use of the program during  
245 the entire study period. This feedback was used as input for the implementation of a revised version  
246 of the program at a later stage. Lastly, the study participants exchanged their experiences with the  
247 self-monitoring program with other patients (users and non-users) during research meetings at the  
248 hospital.

249

## 250 **Results**

### 251 *Study population*

252 In this pilot study, slightly more women than men participated (n=27; 57.4%). Mean( $\pm$ ) age was  
253 57.3(10.7) years. Most patients (n=38) were diagnosed with RA (80.9%), while nine patients were  
254 diagnosed with a SpA (eight patients with PsA, and one patient with AS). Other baseline characteristics  
255 are given in Table 1. Of over 1800 patients with an IRD, we included 47 patients during the study period.  
256 Two patients eventually signed the informed consent form but did not complete any PROMs and were  
257 withdrawn from the study. An overview of the follow-up duration is presented in Figure 1. In total,  
258 twenty-three patients participated from the start (different start dates were possible) until the end of  
259 the study (48.9%). The follow-up duration of the 45 patients who completed PROMs varied between  
260 14 and 597 days, with a mean of 350 days.

261

262 < Figure 1. Follow-up duration in days of the 47 iMonitor participants >

L. Renskers, S.A.A. Rongen-van Dartel, A.M.P. Huis, and P.L.C.M. van Riel

263 Table 1. Baseline characteristics of the 47 patients using the self-monitoring program

264

| Characteristics                                | Rheumatoid arthritis, n = 38 | SpA group, n = 9        |
|------------------------------------------------|------------------------------|-------------------------|
| Patient and disease characteristics            |                              |                         |
| Age, years, mean (SD)                          | 57.74 (11.17)                | 55.67 (8.69)            |
| Female, n (%)                                  | 20 (52.6%)                   | 7 (77.8%)               |
| Disease duration, years, mean (SD)             | 8.08 (4.74)                  | 9.89 (7.25)             |
| DAS28-score, mean (SD)                         | 3.19 (1.25)                  | n.a.                    |
| Educational level                              |                              |                         |
| Low, n (%)                                     | 12 (34.3)                    | 3 (37.5)                |
| Middle, n (%)                                  | 11 (31.4)                    | 3 (37.5)                |
| High, n (%)                                    | 12 (34.3)                    | 2 (25.0)                |
| Baseline PROM-values                           |                              |                         |
| HAQ [0.00-3.00] (n=27), mean, SD, range        | 0.78 (0.61) [0.00;2.38]      | 0.98 (0.60) [0.13;1.88] |
| RADAI-5 [0.00 – 10.00] (n=24), mean, SD, range | 3.49 (2.32) [0.00;7.40]      | n.a.                    |
| RAID [0.00 – 10.00] (n=35) mean, SD, range     | 3.47 (2.28) [0.00;7.61]      | n.a.                    |

L. Renskers, S.A.A. Rongen-van Dartel, A.M.P. Huis, and P.L.C.M. van Riel

|                                       |            |           |
|---------------------------------------|------------|-----------|
| BASFI [0.00 – 10.00] (n=1), mean, SD  | n.a.       | 5.05      |
| BASDAI [0.00 – 10.00] (n=1), mean, SD | n.a.       | 4.60      |
| Medication use                        |            |           |
| csDMARD, n (%)                        | 36 (94.7%) | 8 (88.9%) |
| bDMARD, n (%)                         | 12 (32.0%) | 3 (33.3%) |

265 *SpA: Spondylarthropathy; HAQ: Health Assessment Questionnaire (3 = severe disability); RADAI-5: Rheumatoid Arthritis Disease Activity Index-5 (10 = severe disease activity);*  
 266 *RAID: Rheumatoid Arthritis Impact of Disease (10 = severe impact of disease activity); BASFI: Bath Ankylosing Spondylitis Functional Index (10 = severe functional limitation);*  
 267 *BASDAI: Bath Ankylosing Spondylitis Disease Activity Index (10 = severe disease activity); csDMARD: conventional synthetic Disease-Modifying Antirheumatic Drug; bDMARD:*  
 268 *biological Disease-Modifying Antirheumatic Drug*



L. Renskers, S.A.A. Rongen-van Dartel, A.M.P. Huis, and P.L.C.M. van Riel

269 *Quantitative*

270     ▪ Adherence and agreement

271 Twenty-seven patients (57.4%) were able to use the self-monitoring program without additional  
 272 training, whereas twenty patients (42.6%) attended the instruction classes. With regard to the PROM  
 273 preferences, RAID was chosen most often, namely 34 times. HAQ and RADAI-5 were chosen 27 and 23  
 274 times, respectively. Seventeen patients chose to complete one PROM, 21 patients chose to complete  
 275 two PROMs, and nine patients chose to complete three PROMs. Mean adherence to the  
 276 predetermined PROM frequency was 68.1%, see table 2. With regard to the agreement between the  
 277 DAS28 course and PROM values, RAID scored best (from 25 assessments, 17 times a score of 'good',  
 278 68.0%). RADAI-5, on the other hand, scored 'good' in ten out of seventeen assessments (58.8%), see  
 279 table 3. Figure 2 shows two examples of assessments regarding the agreement between the DAS28  
 280 course and PROM values.

281

282 Table 2. Data regarding PROM frequency, PROM scores, and adherences rates, n = 47

| Item                                                   | n (%)      |
|--------------------------------------------------------|------------|
| PROM frequency                                         |            |
| 1 week                                                 | 4 (8.5)    |
| 2 weeks                                                | 10 (21.3)  |
| 4 weeks                                                | 31 (66.0)  |
| ≥ 6 weeks                                              | 2 (4.3)    |
| Number of PROMs to complete, chosen by patient         |            |
| One                                                    | 17 (36.17) |
| Two                                                    | 21(44.68)  |
| Three                                                  | 9 (19.15)  |
| Mean adherence (%) to the predetermined PROM frequency | 68.1%      |

283 *PROM: Patient-Reported Outcome Measure; Adherence to the predefined PROM frequency: calculated by*

284 *dividing the number of completed PROMs by the number of PROM assessments (based on the reminder emails)*

285 *that should have been completed according to the chosen PROM frequency by the patient, times 100*

286

L. Renskers, S.A.A. Rongen-van Dartel, A.M.P. Huis, and P.L.C.M. van Riel

287 < Figure 2. Example of a positive (above) and negative (below) rating regarding the agreement between  
288 the PROMs and DAS28 course >

289 Table 3. Agreement (poor or good) between the DAS28 course and disease-specific PROMs (RAID and  
290 RADAI-5), assessed in n = 33 patients

| PROM    | Poor      | Good       | Total |
|---------|-----------|------------|-------|
| RAID    | 8 (32.0%) | 17 (68.0%) | 25    |
| RADAI-5 | 7 (41.2%) | 10 (58.8%) | 17    |

291 *PROM: Patient-Reported Outcome Measure; RAID: Rheumatoid Arthritis Impact of Disease; RADAI-5:*  
292 *Rheumatoid Arthritis Disease Activity Index-5; DAS28 course: Disease Activity Score using 28 joint counts,*  
293 *assessed by rheumatologists; Good: DAS28 course and the PROM scores showed the same direction. Poor:*  
294 *DAS28 course and PROM scores showed opposite direction*

295  
296 *Qualitative*

297 We conducted the focus group discussion and telephone interviews between December 2016 and June  
298 2017. The interviews lasted between 24 and 42 minutes, while the focus group discussion lasted one  
299 hour and 22 minutes. Six patients attended the focus group discussion, and four patients participated  
300 in a telephone interview (five female and five male patients).

301  
302 *Patients' experiences regarding the self-monitoring program*

303 Three main themes emerged from the focus group discussion and interviews: knowledge about and  
304 insight into disease (activity), patient-professional interaction, and functionality of the program. Five  
305 subcategories emerged: Disease (self)management, discussing results with healthcare professionals,  
306 technical factors, user interface and PROMs, and patients' suggestions for improvement. Table 4  
307 provides an overview of the themes and subcategories regarding the qualitative analysis.

308

L. Renskers, S.A.A. Rongen-van Dartel, A.M.P. Huis, and P.L.C.M. van Riel

1  
2  
3  
4  
5  
6  
7  
8  
9  
10  
11  
12  
13  
14  
15  
16  
17  
18  
19  
20  
21  
22  
23  
24  
25  
26  
27  
28  
29  
30  
31  
32  
33  
34  
35  
36  
37  
38  
39  
40  
41  
42  
43  
44  
45  
46  
47  
48  
49  
50  
51  
52  
53  
54  
55  
56  
57  
58  
59  
60

309

For peer review only

L. Renskers, S.A.A. Rongen-van Dartel, A.M.P. Huis, and P.L.C.M. van Riel

310 Table 4. Themes and subcategories with regard to the qualitative analysis of patients' experiences  
311 with iMonitor

| Theme                                               | Subcategory                                                                                  |
|-----------------------------------------------------|----------------------------------------------------------------------------------------------|
| Knowledge about and insight into disease (activity) | n.a.                                                                                         |
| Patient-professional interactions                   | - Disease (self)management<br>- Discussing results with healthcare professionals             |
| Functionality of the program                        | - Technical factors<br>- User interface and PROMs<br>- Patients' suggestions for improvement |

312 *Three main themes and five subcategories emerged from the qualitative analysis. The checklist from Flottorp et*  
313 *al.<sup>28</sup> served as a guide for the establishment of the topic guide*

314

315 *Theme I: Knowledge about and insight into disease (activity)*

316 The most cited reason for using the self-monitoring program was that patients gained insight into their  
317 (long-term) disease activity course. Most patients indicated that using the program led to more  
318 knowledge and awareness about their disease. Some patients reported that they recognized peaks in  
319 disease activity earlier and could subsequently prepare for an exacerbation. Patients also mentioned  
320 that they became more prudent when noticing a flare. When asked more specifically about patients'  
321 experiences with the agreement between their PROM values and DAS28 scores, most patients thought  
322 their PROM values were in line with their DAS28. One 55-year old male patient noted: "*By consciously*  
323 *using the program, it was easier to find things about rheumatism and to gain more insight into the*  
324 *question 'What is rheumatism?'*"

L. Renskers, S.A.A. Rongen-van Dartel, A.M.P. Huis, and P.L.C.M. van Riel

325 *Theme II: Patient-professional interactions*

326     ▪ Disease (self)management

327 By using the self-monitoring program, most patients felt less dependent on their HCP. Patients  
328 appreciated the fact that they were able to influence their own disease management. Overall, patients  
329 thought that the self-monitoring program could contribute to a reduction in the number of outpatient  
330 consultations.

331  
332 *"I can monitor my disease course, keep record of my disease activity in-between consultations, without  
333 being dependent on the professional"* (47-year old female patient)

334  
335     ▪ Discussing results with healthcare professionals

336 Patients emphasized the importance of discussing the results of online monitoring (e.g. PROM values)  
337 with their HCP (rheumatologist or nurse). Most of all, they wanted to know if they were 'doing it right'.  
338 Some patients expressed the value of discussing their results with their HCP. One 55-year old male  
339 patient provided the following scenario: *"I used to look at the back of a computer screen during an  
340 outpatient visit. Now, I'm looking at the computer screen together with my HCP, sharing and discussing  
341 the PROM values and our ideas about my treatment"*. Patients who did not discuss their values felt the  
342 need to do so in the future.

343  
344 *Theme III: Functionality of the program*

345     ▪ Technical factors

346 Barriers regarding the use of the self-monitoring program were mostly related to technical aspects.  
347 Some patients had problems with the login system, which hindered them from accessing the website.  
348 Regarding the PROM reminder emails: the system generated an email alert at fixed time points (e.g.  
349 four-weekly). Some patients noticed that the system generated an alert at unfortunate time points or  
350 even no alert at all.

L. Renskers, S.A.A. Rongen-van Dartel, A.M.P. Huis, and P.L.C.M. van Riel

351       ▪ User interface and PROMs

352       Twenty-seven patients joined the instruction classes, which were perceived to be very helpful. Overall,  
353       patients were satisfied with the user interface of the program. They reviewed the layout as clear and  
354       comprehensible. Some patients experienced difficulties with the content and layout of the PROMs. For  
355       example, some patients thought the questions were not specific enough. Furthermore, the program  
356       did not use a progress bar and there was no ‘Accomplish’ sign after completing a PROM. As a result –  
357       in case of completing more than one PROM – some patients did not know how many PROMs they had  
358       actually completed.

360       ▪ Patients’ suggestions for improvement

361       Most commonly mentioned suggestions concerned adjustments to clarify PROM values, for example  
362       a textbox to type a comment in case of an exacerbation. Additionally, patients provided suggestions  
363       concerning the possibility of also having access to their lab values in the self-monitoring program, as  
364       well as the possibility of having a more detailed look at a certain time period.

365

366

L. Renskers, S.A.A. Rongen-van Dartel, A.M.P. Huis, and P.L.C.M. van Riel

367 **Discussion**

368 This study collected experiences from patients with IRDs regarding online self-monitoring. Moreover,  
369 we assessed adherence to the predefined PROM frequency to measure disease activity and the  
370 agreement between the PROMs and the DAS28 course. The qualitative analysis revealed three themes:  
371 knowledge about and insight into disease (activity), patient-professional interaction, and functionality  
372 of the program. Overall, patients were mainly positive about the program and were willing to continue.  
373 Most of them participated for an extended period: mean follow-up duration was almost one year.  
374 Mean adherence to the predefined PROM frequency was 68.1%, and RAID showed best agreement  
375 with the objectively measured DAS28. Patients reported that they gained more knowledge about their  
376 disease and felt less dependent on their HCP.

377

378 By self-monitoring disease activity, patients obtained a graphic overview of their PROM values over  
379 time, which gave them insight into their disease course. Patients reported that they appreciated both  
380 this long-term insight into their disease pattern, and the ability to anticipate on an exacerbation. They  
381 also indicated that they gained more knowledge about their disease, they felt better prepared for a  
382 consultation, and felt less dependent on their HCP in handling their disease. Literature about self-  
383 monitoring in diabetes already showed that knowledge about the disease and self-monitoring are  
384 related<sup>10</sup>. Although some knowledge is a prerequisite for self-monitoring, the process of self-  
385 monitoring contributes to the further expansion of disease-related knowledge. Adequate disease-  
386 related knowledge is important, since it may influence patients' decisions regarding treatment,  
387 compliance, and self-management performance,<sup>31</sup> as well as the ability to recognize signs, symptoms,  
388 and patterns,<sup>10</sup> which is supported by a study about experiences with telehealth in patients with RA.<sup>32</sup>  
389 All of these aspects are essential in shared-decision making,<sup>33</sup> while also being beneficial to the  
390 efficiency of consultations. From the perspective of the HCP, it is important to give feedback to the  
391 patients about the results of self-monitoring during outpatient consultations, a fact that was  
392 emphasized by our study participants during the interviews. Those who had not received feedback

L. Renskers, S.A.A. Rongen-van Dartel, A.M.P. Huis, and P.L.C.M. van Riel

1  
2  
3 393 about their PROM-values and/or disease activity course were less motivated to continue with the  
4  
5 394 program. The importance of feedback was emphasized in a study in which patients with early  
6  
7 395 rheumatoid arthritis received visual feedback by their HCP about their disease progression. Compared  
8  
9 396 to patients who received standard care, patients who received feedback showed significant differences  
10  
11 397 regarding disease activity parameters.<sup>34</sup> Obtaining insight into the long-term disease activity course,  
12  
13 398 and being able to anticipate on an exacerbation, might benefit the effectiveness of the delivered care  
14  
15 399 as well. Patients will be able to respond to a deterioration in a timely manner and will have a greater  
16  
17 400 chance to receive the care they need at the right time, resulting in a decrease of the cumulative disease  
18  
19 401 activity. On the other hand, fewer consultations are possible if the disease activity is stable, which will  
20  
21 402 eventually lead to less frequent outpatient visits. That reduction of health care costs can be obtained  
22  
23 403 by introducing patient-report outcomes (PROs) in the follow-up was shown by a study on tele-health  
24  
25 404 in RA. Patients received PRO-based health follow-up and were scheduled for telephone consultations  
26  
27 405 by a rheumatologist or nurse. Similar results regarding disease control were found for the telehealth  
28  
29 406 group compared with conventional follow-up.<sup>35</sup> Studies on self-monitoring in other chronic diseases  
30  
31 407 have already proven its effectiveness, such as better control of blood glucose levels in diabetes,<sup>36 37</sup>  
32  
33 408 reduction in mortality rates in heart failure,<sup>38 39</sup> reductions in blood pressure in hypertension,<sup>40 41</sup> and  
34  
35 409 reductions in thromboembolic events in patients using anticoagulation therapy.<sup>42</sup> The effectiveness of  
36  
37 410 self-monitoring resulted in a reduction in hospital readmissions in patients with hypertension, COPD  
38  
39 411 and heart failure.<sup>43</sup> Patients in our study believed that self-monitoring could lead to a reduction in  
40  
41 412 consultations, although they stressed the need and possibility for contacting the outpatient clinic when  
42  
43 413 necessary. To our knowledge, there are no studies in IRDs on the efficiency of online remote self-  
44  
45 414 monitoring of the disease activity by completing PROMs using an online program on reduction in  
46  
47 415 consultations. Further research will therefore be needed.  
48  
49 416  
50  
51  
52  
53  
54  
55  
56 417 Barriers regarding online self-monitoring were mostly related to the functionality of the online  
57  
58 418 monitoring system. Some patients experienced log-on problems, while others would like to have  
59  
60



L. Renskers, S.A.A. Rongen-van Dartel, A.M.P. Huis, and P.L.C.M. van Riel

1  
2  
3 419 access in the system to more extensive information about their health status in general (e.g. blood test  
4  
5 420 results). Despite these barriers, almost half of the participants reached the end of the study, and the  
6  
7 421 follow-up duration was almost one year. Literature in the field of technology and innovations indicates  
8  
9 422 that factors such as compatibility, complexity, and relative advantage influence the adoption of new  
10  
11 423 innovations.<sup>44</sup> Therefore, a self-monitoring program should be comprehensible and user-friendly and  
12  
13 424 preferably integrated into an existing hospital system. In addition, we recommend screening patients  
14  
15 425 on motivation and computer skills and providing guided practice. We also recommend to let patients  
16  
17 426 choose their own preferred interval and PROM(s). Forcing patients to complete PROMs at predefined  
18  
19 427 intervals set by researchers does not support our idea of self-management and might impede patients'  
20  
21 428 motivation. Some patients opted for weekly self-assessments, which might seem to be too frequent  
22  
23 429 for us as healthcare professionals. However, especially in an early or active phase of the disease, this  
24  
25 430 seems to provide some measure of support for some patients. Patients were willing and able to self-  
26  
27 431 monitor their disease. The mean adherence to the predetermined PROM frequency was reasonably  
28  
29 432 high: 68.1%. This could be partly explained by system-related factors such as the reminders, which  
30  
31 433 were considered very useful in encouraging patients to complete the questionnaire. Next to this,  
32  
33 434 patient-related factors such as intrinsic motivation might also have influenced this percentage. Since  
34  
35 435 there was no real 'need' or urgency for self-monitoring in our study, as opposed to blood glucose  
36  
37 436 monitoring in diabetes, for example, reaching complete (100%) adherence was not a realistic option.  
38  
39 437 Both the RAID and RADAI-5 had acceptable agreements with the DAS28, 68.0% and 58.8% respectively.  
40  
41 438 Due to the relatively small number of patients no conclusion can be drawn which PROM should be  
42  
43 439 used to self-monitor the disease course.  
44  
45  
46  
47  
48  
49  
50  
51

52 441 By using qualitative methods we were able to examine the experiences and barriers that influence  
53  
54 442 participation in self-monitoring programs. This resulted in a thorough description of factors related to  
55  
56 443 self-monitoring, and guidance for further development of appropriate tools. The main limitation of this  
57  
58 444 study was the selective, highly motivated study population due to the purpose sampling. Because of  
59  
60

1 L. Renskers, S.A.A. Rongen-van Dartel, A.M.P. Huis, and P.L.C.M. van Riel

2  
3 445 the small study sample, it remains unclear which percentage of the total population will be eligible for  
4  
5 446 self-monitoring. However, the main purpose was to gather experiences about self-monitoring, which  
6  
7 447 were provided by the extensive comments of the patients. With regard to difficulties in data  
8  
9 448 interpretation in qualitative research, it remains unclear whether we actually truly grasped what  
10  
11 449 patients were really thinking or feeling. Interpretations might have been influenced by the professional  
12  
13 450 backgrounds and theoretical perspectives of the researchers. However, the coding process was done  
14  
15 451 together with a collaborator who did not have a scientific background. Another limitation is connected  
16  
17 452 to the fact that the moderator was the main care provider for some patients which might have  
18  
19 453 influenced their responses. Despite these limitations, we extensively and thoroughly discussed our  
20  
21 454 data several times in order to identify the relevant categories and emerging themes regarding self-  
22  
23 455 monitoring.

24  
25  
26 456  
27  
28 457 By monitoring their disease activity at home, patients were involved in their own disease management  
29  
30 458 and had individual control and responsibilities. During outpatient visits, patients might be better  
31  
32 459 prepared to interact with their HCP, which will improve shared-decision making, contributing to the  
33  
34 460 concept of personalized care. Self-monitoring – as a prerequisite of self-management – might benefit  
35  
36 461 the cost-effectiveness of outpatient consultations. Efficiency gains are reflected in a reduction in the  
37  
38 462 number of consultations without any increase in costs. At the same time, patient outcomes and  
39  
40 463 patients' satisfaction should either remain stable or increase. This study is a first step toward  
41  
42 464 personalized healthcare and involving the patient in decision making about their disease treatment.  
43  
44 465 Findings from our study were used to implement a self-monitoring program at our outpatient clinic  
45  
46 466 using the Integrated Electronic Patient Record from the hospital.

47  
48 467 The present study showed the potential of self-monitoring as a first step toward disease self-  
49  
50 468 management. Patients reported that they gained more knowledge, felt less dependent on their HCP,  
51  
52 469 and most of them were able to monitor their disease. Therefore, we believe that self-monitoring can  
53  
54  
55  
56  
57  
58  
59  
60

L. Renskers, S.A.A. Rongen-van Dartel, A.M.P. Huis, and P.L.C.M. van Riel

470 benefit the quality and efficiency of healthcare. Further research will be needed to confirm the cost-  
471 effectiveness of self-monitoring.

472

### 473 **Acknowledgment**

474 The authors would like to thank the study participants and Jolanda van Haren (the second coder). They  
475 would also like to thank Pfizer for getting the opportunity to test iMonitor.

476

### 477 **Contributors**

478 Study acquisition: PvR. Conception and design: all authors. Obtaining ethical approval: LR.  
479 Qualitative data collection: LR pretested the topic guide. Focus group discussion: PvR functioned as  
480 moderator and LR as observer. Telephone interviews were conducted by LR. Quantitative data  
481 collection: PvR and SR (mainly clinical data), whereas LR obtained data derived from the self-  
482 monitoring program. Qualitative data analysis: LR was involved as one of the coders during the coding  
483 process, together with a research assistant. Provisional categorization of themes: LR and AH. Final  
484 version of the categorization of themes and categories: all authors. Quantitative data analysis: all  
485 authors. Writing: LR drafted the first version of the manuscript. PvR, AH and SR revised the manuscript.  
486 The final manuscript has been seen and approved by all authors.

487

### 488 **Conflicts of interest**

489 This study was partly funded by Pfizer (pharmaceutical company). Pfizer was able to access data  
490 available from iMonitor. Pfizer was not involved in any medical policy related to the study participants.

491

### 492 **Funding**

493 This study was partly funded by Pfizer Medical and Educational Goods and Services.

494

### 495 **Ethics**

1 L. Renskers, S.A.A. Rongen-van Dartel, A.M.P. Huis, and P.L.C.M. van Riel

2  
3 496 The present study fulfills the Helsinki criteria and was approved by the Medical Ethical Committee of  
4  
5 497 the Radboud University Medical Center Nijmegen approved the study (2016-2435) and concluded that  
6  
7 498 no specific obligations were applicable to this research.  
8

9  
10 499

11 500 **Data**

12  
13 501 (Anonymous) data are available upon reasonable request by contacting the corresponding author by  
14  
15 502 email.  
16

17  
18 503  
19  
20  
21  
22  
23  
24  
25  
26  
27  
28  
29  
30  
31  
32  
33  
34  
35  
36  
37  
38  
39  
40  
41  
42  
43  
44  
45  
46  
47  
48  
49  
50  
51  
52  
53  
54  
55  
56  
57  
58  
59  
60

For peer review only

L. Renskers, S.A.A. Rongen-van Dartel, A.M.P. Huis, and P.L.C.M. van Riel

504 **References**

505

- 506 1. Crawford MJ, Rutter D, Manley C, et al. Systematic review of involving patients in the planning  
507 and development of health care. *BMJ* 2002;325(7375):1263.
- 508 2. Towle A, Bainbridge L, Godolphin W, et al. Active patient involvement in the education of  
509 health professionals. *Med Educ* 2010;44(1):64-74.
- 510 3. de Witt M, Berlo S, Aanerud G, et al. EULAR recommendations for the inclusion of patient  
511 representatives in scientific projects: A EULAR initiative. *Ann Rheum Dis* 2011;70:722-6.
- 512 4. Voshaar MJ, Nota I, van de Laar MA, et al. Patient-centred care in established rheumatoid  
513 arthritis. *Best Pract Res Clin Rheumatol* 2015;29(4-5):643-63.
- 514 5. Bodenheimer T, Lorig K, Holman H, et al. Patient self-management of chronic disease in  
515 primary care. *JAMA* 2002;288(19):2469-75.
- 516 6. Barlow J, Wright C, Sheasby J, et al. Self-management approaches for people with chronic  
517 conditions: a review. *Patient Educ Couns* 2002;48(2):177-87.
- 518 7. Kon AA. The shared decision-making continuum. *JAMA* 2010;304(8):903-04.
- 519 8. McKinstry B. Paternalism and the doctor-patient relationship in general practice. *Br J Gen Pract*  
520 1992;42(361):340-42.
- 521 9. Wilde MH, Garvin S. A concept analysis of self-monitoring. *J Adv Nurs* 2007;57(3):339-50.
- 522 10. Song M, Lipman TH. Concept analysis: Self-monitoring in type 2 diabetes mellitus. *Int J Nurs*  
523 *Stud* 2008;45(11):1700-10.
- 524 11. van Riel P, Alten R, Combe B, et al. Improving inflammatory arthritis management through  
525 tighter monitoring of patients and the use of innovative electronic tools. *RMD Open*  
526 2016;2(2):e000302.
- 527 12. Gossec L, Paternotte S, Aanerud G, et al. Finalisation and validation of the rheumatoid arthritis  
528 impact of disease score, a patient-derived composite measure of impact of rheumatoid  
529 arthritis: a EULAR initiative. *Ann Rheum Dis* 2011;70(6):935-42.

L. Renskers, S.A.A. Rongen-van Dartel, A.M.P. Huis, and P.L.C.M. van Riel

13. Salaffi F, Di Carlo M, Vojinovic J, et al. Validity of the rheumatoid arthritis impact of disease (RAID) score and definition of cut-off points for disease activity states in a population-based European cohort of patients with rheumatoid arthritis. *Joint Bone Spine* 2018;85(3), 317-322.
14. Leeb BF, Haindl PM, Brezinschek HP, et al. RADAI-5 to monitor rheumatoid arthritis. *Clin Exp Rheumatol* 2014;32(5 Suppl 85), S55-8.
15. Leeb, BF, Brezinschek, HP, Rintelen B, et al. RADAI-5 and electronic monitoring tools. *Clin Exp Rheumatol* 2016;34(5), 5-10.16.
16. Leeb BF, Haindl PM, Maktari A, et al. Patient-centered rheumatoid arthritis disease activity assessment by a modified RADAI. *J Rheumatol* 2008;35(7):1294-9.
17. Welsing PMJ, Landewe RBM, van Riel PLCM, et al. The relationship between disease activity and radiologic progression in patients with rheumatoid arthritis - A longitudinal analysis. *Arthritis Rheum* 2004;50(7):2082-93. doi: 10.1002/art.20350
18. Taal E, Riemsma RP, Brus HL, et al. Group education for patients with rheumatoid arthritis. *Patient Educ Couns* 1993;20(2-3):177-87.
19. Prevoo M, van 't Hof MA, Kuper H, et al. Modified disease activity scores that include twenty-eight-joint counts development and validation in a prospective longitudinal study of patients with rheumatoid arthritis. *Arthritis Rheum* 1995;38(1):44-8.
20. Smolen JS, Breedveld FC, Burmester GR, et al. Treating rheumatoid arthritis to target: 2014 update of the recommendations of an international task force. *Ann Rheum Dis* 2016;75(1):3-15.
21. Arnold E, Arnold W, Conaway D, et al. Physician Visits Create a Bottleneck in RA Management: The Rheumatologist; 2015 [Available from: <https://www.the-rheumatologist.org/article/rheumatoid-arthritis-practice-performance-project-spots-problems-in-ra-management/>] accessed 25 February 2019.
22. Jain VK, Negi VS. Inflammatory rheumatic diseases in the elderly. *Indian J Rheumatol* 2016;11(4):207.

L. Renskers, S.A.A. Rongen-van Dartel, A.M.P. Huis, and P.L.C.M. van Riel

- 1  
2  
3 556 23. Hendrikx J, Fransen J, van Riel PL. Monitoring rheumatoid arthritis using an algorithm based  
4  
5 557 on patient-reported outcome measures: a first step towards personalised healthcare. RMD  
6  
7 558 Open 2015;1(1):e000114.  
8  
9  
10 559 24. El Miedany Y. PROMs in inflammatory arthritis: moving from static to dynamic. Clin Rheumatol  
11  
12 560 2013;32(6):735-42. doi: 10.1007/s10067-013-2228-0.  
13  
14 561 25. Calvert M, Kyte D, Price G, et al. Maximising the impact of patient reported outcome  
15  
16 562 assessment for patients and society. BMJ 2019;364:k5267.  
17  
18  
19 563 26. Aletaha D, Neogi T, Silman AJ, et al. 2010 rheumatoid arthritis classification criteria: an  
20  
21 564 American College of Rheumatology/European League Against Rheumatism collaborative  
22  
23 565 initiative. Arthritis Rheum 2010;62(9):2569-81.  
24  
25 566 27. Kelyon. What is iMonitor? 2018 [Available from:  
26  
27 567 <http://www.kelyon.com/en/project/imonitor>] accessed 11<sup>th</sup> July 2019.  
28  
29  
30 568 28. Flottorp SA, Oxman AD, Krause J, et al. A checklist for identifying determinants of practice: a  
31  
32 569 systematic review and synthesis of frameworks and taxonomies of factors that prevent or  
33  
34 570 enable improvements in healthcare professional practice. Implement Sci 2013;8(1):35.  
35  
36  
37 571 29. Pope C, Ziebland S, Mays N. Qualitative research in health care: analysing qualitative data. BMJ  
38  
39 572 2000;320(7227):114.  
40  
41 573 30. Tong A, Sainsbury P, Craig J. Consolidated criteria for reporting qualitative research (COREQ):  
42  
43 574 a 32-item checklist for interviews and focus groups. Int J Qual Health Care 2007;19(6):349-357.  
44  
45  
46 575 31. Barlow J, Wright C. Knowledge in patients with rheumatoid arthritis: a longer term follow-up  
47  
48 576 of a randomized controlled study of patient education leaflets. Br J Rheumatol 1998;37(4):373-  
49  
50 577 76.  
51  
52 578 32. Knudsen LR, De Thurah A, Lomborg K. Experiences With Telehealth Followup in Patients With  
53  
54 579 Rheumatoid Arthritis: A Qualitative Interview Study. Arthritis Care Res (Hoboken)  
55  
56 580 2018;70(9):1366-72.  
57  
58  
59  
60

L. Renskers, S.A.A. Rongen-van Dartel, A.M.P. Huis, and P.L.C.M. van Riel

- 1  
2  
3 581 33. Joseph-Williams N, Elwyn G, Edwards A. Knowledge is not power for patients: a systematic  
4  
5 582 review and thematic synthesis of patient-reported barriers and facilitators to shared decision  
6  
7 583 making. *Patient Educ Couns* 2014;94(3):291-309.
- 8  
9  
10 584 34. El Miedany Y, El Gaafary M, Palmer D. Assessment of the utility of visual feedback in the  
11  
12 585 treatment of early rheumatoid arthritis patients: a pilot study. *Rheumatol Int*  
13  
14 586 2012;32(10):3061-68.
- 15  
16 587 35. De Thurah A, Stengaard-Pedersen K, Axelsen M, et al. Tele-Health Followup Strategy for Tight  
17  
18 588 Control of Disease Activity in Rheumatoid Arthritis: Results of a Randomized Controlled Trial.  
19  
20 589 *Arthritis Care Res (Hoboken)* 2018;70(3):353-60.
- 21  
22  
23 590 36. Poolsup N, Suksomboon N, Rattanasookchit S. Meta-analysis of the benefits of self-monitoring  
24  
25 591 of blood glucose on glycemic control in type 2 diabetes patients: an update. *Diabetes Technol*  
26  
27 592 *Ther* 2009;11(12):775-84.
- 28  
29  
30 593 37. Hunt CW. Technology and diabetes self-management: an integrative review. *World J Diabetes*  
31  
32 594 2015;6(2):225.
- 33  
34 595 38. Nakamura N, Koga T, Iseki H. A meta-analysis of remote patient monitoring for chronic heart  
35  
36 596 failure patients. *J Telemed Telecare* 2014;20(1):11-17.
- 37  
38  
39 597 39. Conway A, Inglis SC, Clark RA. Effective technologies for noninvasive remote monitoring in  
40  
41 598 heart failure. *Telemed J E Health* 2014;20(6):531-38.
- 42  
43 599 40. Bray EP, Holder R, Mant J, et al. Does self-monitoring reduce blood pressure? Meta-analysis  
44  
45 600 with meta-regression of randomized controlled trials. *Ann Med* 2010;42(5):371-86.
- 46  
47  
48 601 41. Uhlig K, Patel K, Ip S, et al. Self-measured blood pressure monitoring in the management of  
49  
50 602 hypertension: a systematic review and meta-analysis. *Ann Intern Med* 2013;159(3):185-94.
- 51  
52 603 42. Heneghan C, Ward A, Perera R, et al. Self-monitoring of oral anticoagulation: systematic review  
53  
54 604 and meta-analysis of individual patient data. *Lancet* 2012;379(9813):322-34.
- 55  
56  
57 605 43. McBain H, Shipley M, Newman S. The impact of self-monitoring in chronic illness on healthcare  
58  
59 606 utilisation: a systematic review of reviews. *BMC Health Serv Res* 2015;15(1):565.
- 60



L. Renskers, S.A.A. Rongen-van Dartel, A.M.P. Huis, and P.L.C.M. van Riel

1  
2  
3  
4  
5  
6  
7  
8  
9  
10  
11  
12  
13  
14  
15  
16  
17  
18  
19  
20  
21  
22  
23  
24  
25  
26  
27  
28  
29  
30  
31  
32  
33  
34  
35  
36  
37  
38  
39  
40  
41  
42  
43  
44  
45  
46  
47  
48  
49  
50  
51  
52  
53  
54  
55  
56  
57  
58  
59  
60

607 44. Rogers EM. Diffusion of innovations: Simon and Schuster 2010.

608

609

For peer review only

L. Renskers, S.A.A. Rongen-van Dartel, A.M.P. Huis, and P.L.C.M. van Riel

610 **Figure legends**

611 **Figure 1:**

612 *Y-axis: 47 patients who participated in the self-monitoring program, each line represents a patient; X-axis: days*  
613 *since start of study (different start days possible for patients)*

614

615 **Figure 2:**

616 *DAS28: Disease Activity Score 28; PROM: Patient-Reported Outcome Measure; RADAI-5: Rheumatoid Arthritis*  
617 *Disease Activity Index-5; RAID: Rheumatoid Arthritis Impact of Disease.*

618 *Above: good congruence between PROM-values and DAS28-scores. Below: poor congruence between PROM-*  
619 *values and DAS28-scores*

620 *Poor: DAS28 course and PROM scores show opposite direction; Good: DAS28 course and the PROM scores show*  
621 *the same direction*

Figure 1. Follow-up duration in days of the 47 iMonitor participants

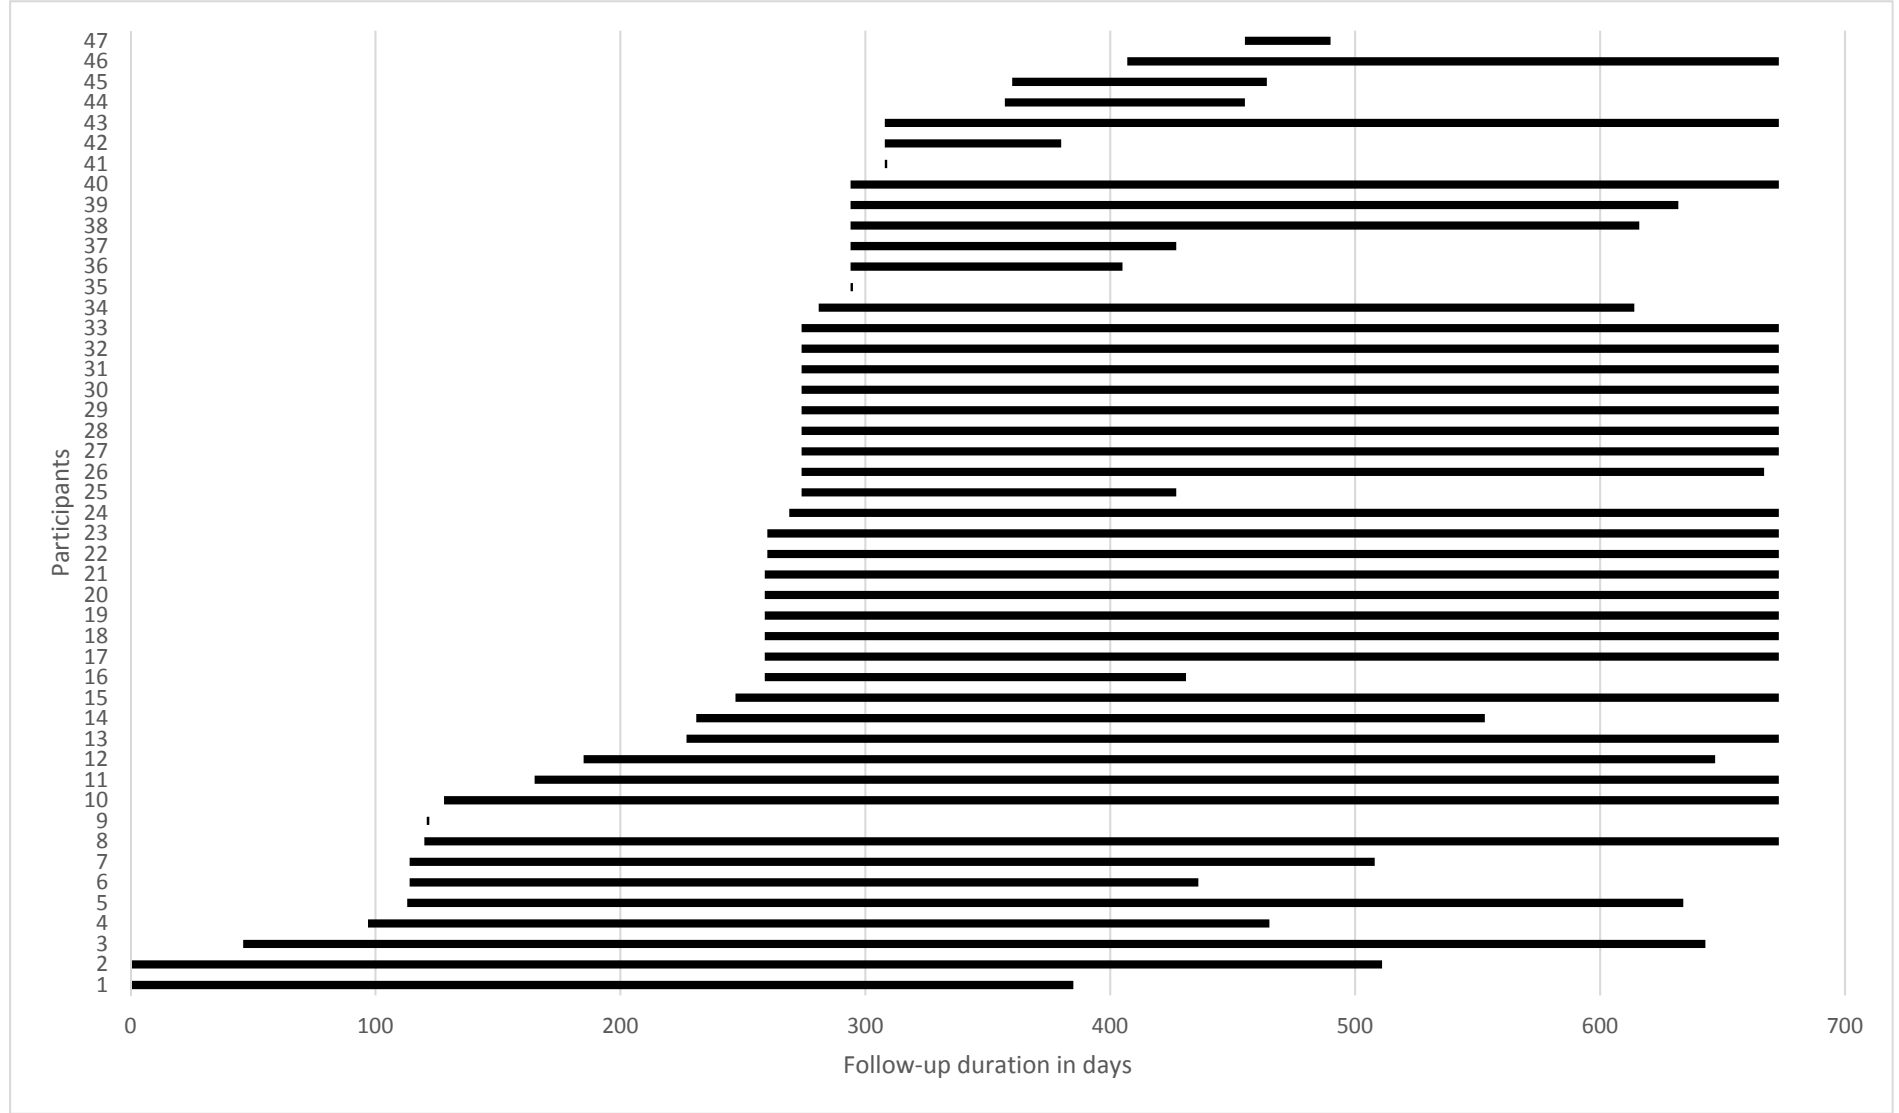

Y-axis: 47 patients who participated in the self-monitoring program, each line represents a patient; X-axis: days since start of study (different start days possible for patients)

Figure 2. Example of a positive (above) and negative (below) rating regarding the agreement between the PROMs and DAS28 course

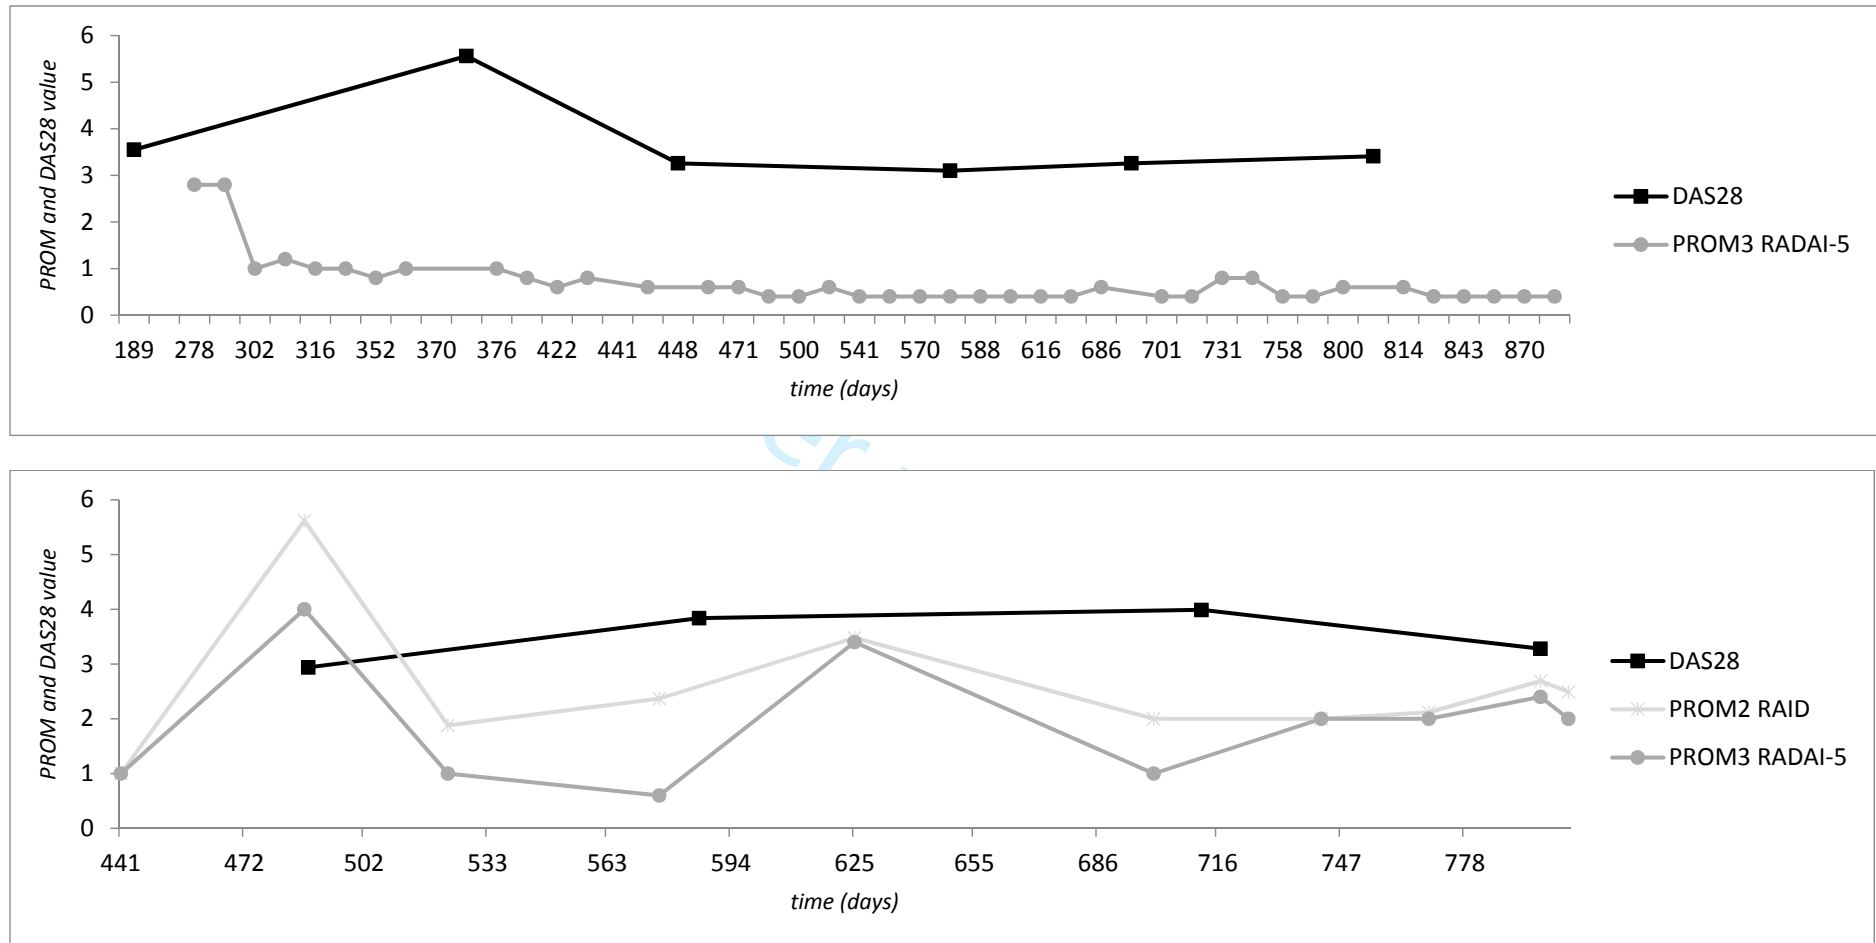

DAS28: Disease Activity Score 28; PROM: Patient-Reported Outcome Measure; RADAI-5: Rheumatoid Arthritis Disease Activity Index-5; RAID: Rheumatoid Arthritis Impact of Disease.

Above: good congruence between PROM-values and DAS28-scores. Below: poor congruence between PROM-values and DAS28-scores

Poor: DAS28 course and PROM scores show opposite direction; Good: DAS28 course and the PROM scores show the same direction

## Appendix

Topic guide: "Patients' experiences regarding online self-monitoring of the disease course"

### Guideline related factors

1. Which elements of the program are useful in your opinion, and why? Which are not useful, and why?
2. On what devices are you using the program?
3. What are your experiences with using iMonitor on these devices?
4. What do you think about the lay-out of iMonitor?
5. What do you think about the lay-out of de questionnaires/PROMs?
6. Do you encounter any technical problems while using iMonitor? If yes, which problems have occurred?
7. How did you experience creating a password?

### Patient related factors

#### Motivation

8. For what specific reasons do you use the program?
9. What do you think are the benefits of using iMonitor?
10. Are there any reasons why you should not use the program?

#### Needs

11. To what specific needs does iMonitor comply?

#### Skills

12. Which skills are needed to use iMonitor properly according to you?
13. Do you have those skills?

#### Self-efficacy

14. Do you think you are capable to use iMonitor correctly? Why?

#### Adherence

You received an email-alert in case a PROM/PROMs could be completed.

15. What are your experiences with receiving those alerts?
16. What do you think about the idea of receiving alerts?
17. To what extent do these email-alerts activate you to complete the PROM/PROMs?

1  
2  
3  
4  
5 Social support

6 18. Are you supported by others (family, friends, peers) regarding the use of iMonitor?

7  
8 If yes: who and to what extent?

9  
10 19. Do you talk with others about iMonitor? If yes, who?

11  
12 20. How do you feel about receiving that social support?

13  
14  
15 Professional interaction

16 21. Do you/did you discuss the use of iMonitor with your rheumatologist or nurse specialist?

17  
18 22. If yes, how do you/did you feel about that?

19  
20 23. In case you attended the instruction class: What is your opinion about this instruction class?

21  
22  
23 Incentives and resources

24  
25 Incentives/stimuli

26 24. In case you kept using the program: what made you keep using the program?

27  
28 25. Which additional value do you experience by using iMonitor?  
29  
30  
31  
32  
33  
34  
35  
36  
37  
38  
39  
40  
41  
42  
43  
44  
45  
46  
47  
48  
49  
50  
51  
52  
53  
54  
55  
56  
57  
58  
59  
60

1  
2  
3 Knowledge

4  
5 26. Do you gain more knowledge by using the program?

- 6  
7 a. If yes, how and to what extent?  
8  
9 b. If no, why not?

10  
11  
12 Time investment

13  
14 27. What do you think about the time investment needed in order to use iMonitor?

15  
16  
17 Capacity for organizational change

18  
19 28. Do you think that using iMonitor could contribute to a reduction in the number of outpatient  
20 consultations, and why? Or why not?

21  
22 29. Do you have any recommendations in order to recruit more patients?

23  
24  
25 Social, political and legal factors

26  
27 30. How do you think about the privacy standards regarding the use of iMonitor?

28  
29 31. Have there been any issues you needed to solve?

30  
31  
32 Any additional information you want to share with us? Any comments or suggestions?  
33  
34  
35  
36  
37  
38  
39  
40  
41  
42  
43  
44  
45  
46  
47  
48  
49  
50  
51  
52  
53  
54  
55  
56  
57  
58  
59  
60

# BMJ Open

**Patients' experiences regarding self-monitoring of the disease course: an observational pilot study in patients with Inflammatory Rheumatic Diseases at a rheumatology outpatient clinic in the Netherlands**

|                                 |                                                                                                                                                                                                                                                                                            |
|---------------------------------|--------------------------------------------------------------------------------------------------------------------------------------------------------------------------------------------------------------------------------------------------------------------------------------------|
| Journal:                        | <i>BMJ Open</i>                                                                                                                                                                                                                                                                            |
| Manuscript ID                   | bmjopen-2019-033321.R3                                                                                                                                                                                                                                                                     |
| Article Type:                   | Original research                                                                                                                                                                                                                                                                          |
| Date Submitted by the Author:   | 14-May-2020                                                                                                                                                                                                                                                                                |
| Complete List of Authors:       | Renskers, Lisanne; Radboudumc, IQ healthcare<br>Rongen-van Dartel, Sanne; Radboudumc, IQ healthcare; Bernhoven Hospital Location Uden, Rheumatology<br>Huis, Anita; Radboudumc, IQ healthcare<br>van Riel, Piet; Radboudumc, IQ healthcare; Bernhoven Hospital Location Uden, Rheumatology |
| <b>Primary Subject Heading</b>: | Rheumatology                                                                                                                                                                                                                                                                               |
| Secondary Subject Heading:      | Qualitative research, Rheumatology, Patient-centred medicine                                                                                                                                                                                                                               |
| Keywords:                       | RHEUMATOLOGY, QUALITATIVE RESEARCH, EDUCATION & TRAINING (see Medical Education & Training)                                                                                                                                                                                                |
|                                 |                                                                                                                                                                                                                                                                                            |

SCHOLARONE™  
Manuscripts





I, the Submitting Author has the right to grant and does grant on behalf of all authors of the Work (as defined in the below author licence), an exclusive licence and/or a non-exclusive licence for contributions from authors who are: i) UK Crown employees; ii) where BMJ has agreed a CC-BY licence shall apply, and/or iii) in accordance with the terms applicable for US Federal Government officers or employees acting as part of their official duties; on a worldwide, perpetual, irrevocable, royalty-free basis to BMJ Publishing Group Ltd ("BMJ") its licensees and where the relevant Journal is co-owned by BMJ to the co-owners of the Journal, to publish the Work in this journal and any other BMJ products and to exploit all rights, as set out in our [licence](#).

The Submitting Author accepts and understands that any supply made under these terms is made by BMJ to the Submitting Author unless you are acting as an employee on behalf of your employer or a postgraduate student of an affiliated institution which is paying any applicable article publishing charge ("APC") for Open Access articles. Where the Submitting Author wishes to make the Work available on an Open Access basis (and intends to pay the relevant APC), the terms of reuse of such Open Access shall be governed by a Creative Commons licence – details of these licences and which [Creative Commons](#) licence will apply to this Work are set out in our licence referred to above.

Other than as permitted in any relevant BMJ Author's Self Archiving Policies, I confirm this Work has not been accepted for publication elsewhere, is not being considered for publication elsewhere and does not duplicate material already published. I confirm all authors consent to publication of this Work and authorise the granting of this licence.

L. Renskers, S.A.A. Rongen-van Dartel, A.M.P. Huis, and P.L.C.M. van Riel

**1 Full title**

2 Patients' experiences regarding self-monitoring of the disease course: an observational pilot study in  
3 patients with Inflammatory Rheumatic Diseases at a rheumatology outpatient clinic in the  
4 Netherlands

**6 Author names and ORCID ID numbers**

7 Lianne Renskers (0000-0003-1413-1629)  
8 Sanne Rongen-van Dartel (0000-0002-2536-0024)  
9 Anita Huis (0000-0003-1144-163X)  
10 Piet van Riel (0000-0001-7719-8906)

**12 Keywords**

13 Rheumatoid Arthritis; Spondyloarthritis; Patient Perspective; Psoriatic Arthritis; Qualitative research

**15 Institution**

16 Radboud university medical center, Radboud Institute for Health Sciences  
17 IQ healthcare  
18 Geert Grooteplein 21  
19 PO Box 9101 (114)  
20 6500 HB Nijmegen  
21 The Netherlands  
22 Telephone number: (0031) 24 36 15305

**24 Author affiliations**

25 L. Renskers<sup>1</sup>, MSc., S.A.A. Rongen- van Dartel<sup>1,2</sup>, PhD., A.M.P. Huis<sup>1</sup>, PhD., P.L.C.M. van Riel<sup>1,2</sup>, MD,  
26 PhD.

27 <sup>1</sup>Radboud university medical center, Radboud Institute for Health Sciences, IQ healthcare, Nijmegen,  
28 the Netherlands, <sup>2</sup>Bernhoven, Department of Rheumatology, Uden

**30 Corresponding author**

31 Lianne Renskers, MSc.  
32 Radboud university medical center  
33 Scientific Center for Quality of Healthcare (IQ healthcare)  
34 PO Box 9101 (114)

L. Renskers, S.A.A. Rongen-van Dartel, A.M.P. Huis, and P.L.C.M. van Riel

6500 HB Nijmegen, The Netherlands

Telephone number: (0031) 24 36 10329 – E-mail address: lisanne.renskers@radboudumc.nl

37

## 38 **Abstract**

39 Objectives. Self-monitoring the disease course is a relatively new concept in the management of  
40 patients with Inflammatory Rheumatic Diseases (IRDs). The aims of this pilot study were to obtain  
41 patients' experiences with online self-monitoring, to assess information about the agreement between  
42 the disease course assessed with Patient Reported Outcome Measures (PROMs) and an objectively  
43 measured Disease Activity Score by the rheumatologist (DAS28), and to assess adherence to  
44 predetermined PROM frequency intervals.

45

46 Design. Observational study using qualitative and quantitative methods.

47 Setting. The rheumatology outpatient clinic of a teaching hospital in the Netherlands (secondary care).

48 Participants: 47 Patients with an IRD who regularly attended the outpatient clinic.

49

50 Methods. Patients completed PROMs by using an online self-monitoring program. Their experiences  
51 regarding self-monitoring were qualitatively assessed through a focus group discussion and telephone  
52 interviews using a thematic analysis approach. Adherence to the predefined PROM frequency  
53 (completed PROM assessments within the predetermined frequency) and the agreement between the  
54 DAS28 course and PROM values (Rheumatoid Arthritis Disease Activity Index-5 (RADAI-5) and the  
55 Rheumatoid Arthritis Impact of Disease (RAID)) were quantitatively assessed using descriptives.

56

57 Results. Forty-seven patients participated, most of them diagnosed with RA (n = 38, 80.9%). Three  
58 themes were identified: knowledge about and insight into disease (activity), patient-professional  
59 interaction, and functionality of the program. Mean adherence to the predetermined PROM frequency  
60 was 68.1%. The RAID showed the best agreement with the DAS28 course. Mean participation time was  
61 350 days.

L. Renskers, S.A.A. Rongen-van Dartel, A.M.P. Huis, and P.L.C.M. van Riel

62  
63 Conclusion. Patients were predominantly positive about online self-monitoring. They indicated that  
64 they gained more knowledge about their disease, felt less dependent on the healthcare professional,  
65 and valued the insight into their long-term disease course. Barriers were mostly related to technical  
66 factors. Patients were able to and willing to self-monitor their disease, which could contribute to a  
67 more efficient allocation of outpatient consultations in the future.

68

69

For peer review only

L. Renskers, S.A.A. Rongen-van Dartel, A.M.P. Huis, and P.L.C.M. van Riel

70 **Article summary**

71

72 Strengths and limitations of this study:

73

- 74 • A strength of this study is the use of both qualitative and quantitative research methods,  
75 providing a rich description of factors associated with self-monitoring
- 76 • Patients were closely involved during the development stage, execution, and evaluation  
77 stage of this study, which increases the clinical relevance according to a user perspective
- 78 • Using validated Patient Reported Outcome Measures (PROMs) assessing disease activity and  
79 disease impact allowed us to compare these PROM scores with objective, health professional  
80 assessed scores
- 81 • The selective and small study population might have influenced the generalizability and  
82 applicability of the study

83

L. Renskers, S.A.A. Rongen-van Dartel, A.M.P. Huis, and P.L.C.M. van Riel

## 84 Introduction

85 In chronic care, there is a tendency toward personalized healthcare. Patients have become more  
86 empowered and are increasingly involved in the planning and development of healthcare.<sup>1-4</sup> There is a  
87 shift from a paternalistic model (in which the doctor is dominant and believes that patients need to be  
88 guided through the decision making process) to a shared-decision making model (in which doctor and  
89 patient make mutual, collaborative decisions). This shift requires an engaged patient who takes  
90 responsibilities regarding day-to-day disease management.<sup>5-8</sup> As a result of this shift, new roles for  
91 both patients and healthcare professionals (HCPs) have arisen. An example of what this new role  
92 entails for a patient is self-monitoring, in which a patient undertakes self-measurement of vital signs,  
93 symptoms, behavior, or psychological well-being through Patient-Reported Outcome Measures  
94 (PROMs).<sup>9-10</sup> In some patients with Inflammatory Rheumatic Diseases (IRDs) such as Rheumatoid  
95 Arthritis (RA), Psoriatic Arthritis (PsA), or Ankylosing Spondylitis (AS), self-monitoring may gradually  
96 replace the traditional monitoring by HCPs.<sup>11</sup> Examples of disease-specific and validated PROMs in IRDs  
97 that can be used in self-monitoring are the Rheumatoid Arthritis Impact of Disease<sup>12-13</sup> (RAID), which  
98 measures disease impact, and the Rheumatoid Arthritis Disease Activity Index-5<sup>14-16</sup> (RADAI-5), which  
99 measures disease activity. An example of a general or non-specific PROM is the Health Assessment  
100 Questionnaire (HAQ), measuring functional status.

101 There are however also other reasons why self-monitoring in patients with IRD has gained  
102 more interest. Usual care in patients with IRDs is primarily aimed at suppressing disease activity, in  
103 order to prevent structural damage.<sup>17-18</sup> The disease activity can be measured using a composite index,  
104 the Disease Activity Score using 28 joint counts<sup>19</sup>, which measures tender and swollen joint counts,  
105 acute phase response, and a patient's general health assessment. The Treat-to-Target Task Force  
106 recommends rheumatologists to monthly assess patients with moderate or high disease activity, and  
107 patients with controlled and low disease activity every three to six months.<sup>20</sup> In practice, however,  
108 these frequencies are not always met for various reasons. This strategy causes time constraints and a  
109 growing workload among rheumatologists, making it not manageable for all rheumatologists to comply

L. Renskers, S.A.A. Rongen-van Dartel, A.M.P. Huis, and P.L.C.M. van Riel

1  
2  
3 110 fully to the frequent assessments.<sup>21</sup> Another reason is connected to the aging population. The number  
4  
5 111 and proportion of patients with IRDs aged 65 and over will increase in the near future.<sup>22</sup> Self-  
6  
7 112 monitoring of the disease course using disease-specific PROMs such as RAID or RADAI-5 could prove  
8  
9  
10 113 to be a solution in diminishing the number of consultations.<sup>23</sup> As disease activity can only be objectively  
11  
12 114 assessed during outpatient consultations, it remains unclear what happens to the disease activity in-  
13  
14 115 between consultations. Fluctuations and peaks in disease activity are easily missed or they remain  
15  
16 116 unnoticed, which could have disastrous consequences regarding joint damage.<sup>17</sup> Self-monitoring might  
17  
18 117 also give a better insight into these fluctuations of disease activity in-between outpatient clinical  
19  
20 118 consultations. Moreover, some patients visit their rheumatologist while their disease activity is under  
21  
22 119 control, thereby contributing to unnecessary outpatient consultations. Summarizing, self-monitoring  
23  
24 120 of disease activity in IRDs as a first step toward personalized healthcare enables patients as well as  
25  
26 121 HCPs to get insight into the disease activity course over time. Moreover, it may lead to a more  
27  
28 122 consistent reporting in the long term and may contribute to optimizing the number, timing, and  
29  
30 123 efficiency of consultations.<sup>11,23</sup> By completing PROMs, patients who need further medical attention can  
31  
32 124 be identified and receive additional medical attention. Moreover, completion of a PROM will help a  
33  
34 125 patient to prepare for a visit and it could improve the communication between physician and patient.<sup>24</sup>  
35  
36  
37  
38

39 126 <sup>25</sup>

40  
41 127 In the present study an online self-monitoring program was pilot-tested in order to test the  
42  
43 128 feasibility of self-monitoring before implementation of a self-monitoring program in daily clinical  
44  
45 129 practice. The aims of this study were to obtain patients' experiences regarding online self-monitoring,  
46  
47 130 to assess the agreement between the disease course assessed with disease-specific PROMs (RAID and  
48  
49 131 RADAI-5) and an objectively measured disease activity score (DAS28) by the rheumatologist, and to  
50  
51 132 assess the adherence to predetermined PROM frequency intervals.  
52  
53  
54  
55  
56  
57  
58  
59  
60

133

L. Renskers, S.A.A. Rongen-van Dartel, A.M.P. Huis, and P.L.C.M. van Riel

1  
2  
3 134 **Methods**

4  
5 135 *Study design*

6  
7 136 This observational pilot study using quantitative and qualitative research methods, was conducted at  
8  
9 137 a teaching hospital in Uden (the Netherlands) at the rheumatology outpatient clinic from 6 July 2015  
10  
11 138 until 9 May 2017.

12  
13  
14 139  
15  
16 140 *Inclusion criteria*

17  
18 141 In order to be eligible for this study, patients had to be diagnosed with an IRD according to the  
19  
20 142 ACR/EULAR criteria.<sup>26</sup> Furthermore, they needed to have an electronic device (laptop/PC, tablet or  
21  
22 143 Smartphone) with access to the Internet, and they needed to be able to sufficiently read and write  
23  
24 144 Dutch. Patient inclusion started in July 2015 and we included the last patient in October 2016.  
25  
26  
27 145

28  
29  
30 146 *Follow-up duration*

31  
32 147 Patients were able to withdraw from the program at any time point. We defined early study  
33  
34 148 termination in two manners: when a patient reported to withdraw from the self-monitoring program,  
35  
36 149 this was evaluated as the end date. Some patients did not report dropping out of the study but did  
37  
38 150 stop completing PROM(s). End of study in these cases was set by adding the interval time to the date  
39  
40 151 the last PROM was filled in. For example, a patient with a four-week PROM frequency (28 days)  
41  
42 152 completed the last PROM on 1 March 2017. For this patient, end of study date was set on 29 March  
43  
44 153 2017.  
45  
46  
47 154

48  
49  
50 155 *Self-monitoring program*

51  
52 156 iMonitor, the online self-monitoring program tested in this study, was developed by Pfizer.<sup>27</sup> The  
53  
54 157 program was accessible through a laptop, tablet or Smartphone by filling in a user name, password,  
55  
56 158 and pin code. The program complied with the required privacy standards. Because the program was  
57  
58 159 intended to stimulate patient involvement, personalized healthcare and patient self-management,  
59  
60



L. Renskers, S.A.A. Rongen-van Dartel, A.M.P. Huis, and P.L.C.M. van Riel

160 patients selected their preferred PROM(s) and PROM frequency (one-, two-, four-, six- or eight-weekly)  
161 in advance and the system generated an email-alert for filling in a PROM (or PROMs) accordingly.  
162 Patients were able to complete one or more PROMs within a timeframe of 24 hours. They could send  
163 a message to the HCPs in case of questions or notifications by using the message option. In case of  
164 urgent matters, they could contact the outpatient clinic by telephone.

165

#### 166 *Patient-Reported Outcome Measures (PROMs)*

167 Available disease-specific PROMs for patients with RA were the RAID and the RADAI-5, measuring  
168 disease impact (0-10; 10 = severe impact of disease activity) and disease activity (0-10; 10 = severe  
169 disease activity). Patients with AS could fill in the disease-specific Bath Ankylosing Spondylitis Disease  
170 Activity Index (BASDAI), measuring disease activity (0-10; 10 = severe disease activity), and/or the Bath  
171 Ankylosing Spondylitis Functional Index (BASFI), measuring physical function (0-10; 10 = severe  
172 functional limitation). The HAQ, general PROM that measures physical function, was available for all  
173 patients (0-3; 3 = severe disability). Patients could opt to assess one to three PROMs. Completion of all  
174 PROMs took about 5 minutes. After completion, the PROM scores were subsequently displayed in a  
175 graph. Additionally, DAS28 scores (0-10; remission:  $DAS28 < 2.6$ , low disease activity:  $\geq 2.6$   $DAS28 < 3.2$ ,  
176 moderate disease activity:  $\geq 3.2$   $DAS28 \leq 5.1$ , high disease activity:  $DAS28 > 5.1$ ) could be added to the  
177 graph by the HCP. These DAS28 scores were obtained by the HCPs during outpatient consultations and  
178 were kept in the electronic medical files from the hospital.

179

#### 180 *Procedure - Recruitment*

181 Patients were informed about this pilot study and recruited in several ways. Firstly, we used purposive  
182 sampling: rheumatologists themselves asked possible suitable patients to participate during  
183 outpatient consultations during the entire study period. Secondly, during general information  
184 meetings at the hospital, patients were informed about the study and were able to sign up. Lastly,  
185 leaflets about the study were available in the waiting room and patients were informed about the

L. Renskers, S.A.A. Rongen-van Dartel, A.M.P. Huis, and P.L.C.M. van Riel

186 study through the hospital's website. Patients received a manual containing information regarding  
187 access to and use of the program. However, a substantial number needed additional training, which  
188 was provided by instruction classes. After patients had been instructed how to use the program, they  
189 could indicate which PROM(s) they preferred to fill in by showing them the paper versions. Moreover,  
190 they were asked to indicate their desired frequency option. Patients who agreed to take part in the  
191 study were asked to sign a consent form. During the regular outpatient consultations, rheumatologists  
192 were expected to provide feedback to the patient about the patient's disease course and PROM  
193 results.

194

#### 195 *Data collection and analysis*

##### 196 Quantitative methods

##### 197     ▪ Adherence and agreement

198 Firstly, we determined adherence to the predetermined PROM frequency by assessing whether a  
199 patient had completed (yes or no) the PROM(s) in the predetermined time interval. Adherence was  
200 calculated as the number of completed assessments by the patient divided by the number of PROM  
201 assessments that should have been completed according to the chosen interval of the patient times  
202 100%. For example, a patient with a weekly PROM frequency participated for one year. This patient  
203 should have received 52 email-alerts, so 52 PROM assessments should have been completed. This  
204 patient completed 40 PROM assessments, so adherence is  $(40/52*100 = )$  76.9%. Secondly, we  
205 determined the agreement between the DAS28 course and PROM values. Two researchers (LR and  
206 PvR) independently assessed agreement by comparing the DAS28 course with the corresponding  
207 PROM-value(s) from the RAID and/or RADAI-5 using two categories (poor and good) and discussed  
208 discrepancies. The RAID and the RADAI-5 were used, because these two disease-specific PROMs  
209 measure disease impact and activity, whereas the HAQ is non-disease specific. 'Good' was used in  
210 cases where the DAS28 course and the PROM scores showed the same direction (i.e. the DAS28 course  
211 increased and PROM scores as well). 'Poor' was used in cases where the DAS28 course and PROM

L. Renskers, S.A.A. Rongen-van Dartel, A.M.P. Huis, and P.L.C.M. van Riel

212 scores showed opposite directions (the DAS28 course increased and PROM scores decreased (or the  
213 other way around). Data from patients with at least three PROM values (falling within a fourteen-day-  
214 window with DAS28 assessment) were assessed.

215

216 *Qualitative methods*

217 Patients' experiences with the self-monitoring program were obtained via a focus group and semi-  
218 structured interviews. The purpose of the focus group and interviews was to gain insight into relevant  
219 factors that might hinder or facilitate patients using the self-monitoring program. The checklist from  
220 Flottorp et al.<sup>28</sup> served as an inspiration for a semi-structured topic guide (see appendix). Relevant  
221 domains for our topic guide were: program factors; patient factors; professional-patient interaction  
222 factors; and resources. Prior to the start of the focus group discussion we conducted a telephone  
223 interview with one patient to check the appropriateness of the topic guide and to check whether the  
224 questions were clear. During the focus group discussion, an experienced moderator (PvR) guided the  
225 discussion. Patients unable to attend the focus group were interviewed by telephone, using the same  
226 topic guide. All participating patients had at least six months experience with the self-monitoring  
227 program.

228

229 *Qualitative analysis*

230 The interviews and focus group discussion were recorded. The recordings were transcribed ad verbum  
231 by an independent agency. One of the researchers (LR) and a research assistant independently coded  
232 the transcripts, in order to enhance the coding process, data interpretability, and trustworthiness.  
233 They used the method 'thematic analysis' in which the codes were derived from the data with the  
234 purpose to describe relevant factors regarding self-monitoring and to identify categories and themes.  
235 A constant comparative method was used for the analysis of the emerging themes. Any discrepancies  
236 in the analysis were discussed until consensus was reached<sup>29</sup>. Afterwards, two researchers (LR and AH)  
237 agreed on a provisional categorization and overarching themes. These categories and overarching

L. Renskers, S.A.A. Rongen-van Dartel, A.M.P. Huis, and P.L.C.M. van Riel

238 themes were also discussed with a third and fourth researcher (SR and PvR). The COnsolidated criteria  
239 for REporting Qualitative research (COREQ) checklist<sup>30</sup> was mainly used as guidance for the reporting  
240 of our qualitative research. We conducted coding and analysis by using a qualitative software program  
241 (Atlas.ti).

#### 243 *Patient and public involvement*

244 Firstly, patient involvement was needed during the establishment of the topic guide, which was pre-  
245 tested among one patient in order to check if the questions were comprehensible and clear. Secondly,  
246 patients were encouraged to give suggestions and comments regarding the use of the program during  
247 the entire study period. This feedback was used as input for the implementation of a revised version  
248 of the program at a later stage. Lastly, the study participants exchanged their experiences with the  
249 self-monitoring program with other patients (users and non-users) during research meetings at the  
250 hospital.

## 252 **Results**

### 253 *Study population*

254 In this pilot study, slightly more women than men participated (n=27; 57.4%). Mean( $\pm$ ) age was  
255 57.3(10.7) years. Most patients (n=38) were diagnosed with RA (80.9%), while nine patients were  
256 diagnosed with a SpA (eight patients with PsA, and one patient with AS). Other baseline characteristics  
257 are given in Table 1. Of over 1800 patients with an IRD, we included 47 patients during the study period.  
258 Two patients eventually signed the informed consent form but did not complete any PROMs and were  
259 withdrawn from the study. An overview of the follow-up duration is presented in Figure 1. In total,  
260 twenty-three patients participated from the start (different start dates were possible) until the end of  
261 the study (48.9%). The follow-up duration of the 45 patients who completed PROMs varied between  
262 14 and 597 days, with a mean of 350 days.

L. Renskers, S.A.A. Rongen-van Dartel, A.M.P. Huis, and P.L.C.M. van Riel

1  
2  
3  
4  
5  
6  
7  
8  
9  
10  
11  
12  
13  
14  
15  
16  
17  
18  
19  
20  
21  
22  
23  
24  
25  
26  
27  
28  
29  
30  
31  
32  
33  
34  
35  
36  
37  
38  
39  
40  
41  
42  
43  
44  
45  
46  
47  
48  
49  
50  
51  
52  
53  
54  
55  
56  
57  
58  
59  
60

264 < Figure 1. Follow-up duration in days of the 47 iMonitor participants >

For peer review only

L. Renskers, S.A.A. Rongen-van Dartel, A.M.P. Huis, and P.L.C.M. van Riel

265 Table 1. Baseline characteristics of the 47 patients using the self-monitoring program

266

| Characteristics                                | Rheumatoid arthritis, n = 38 | SpA group, n = 9        |
|------------------------------------------------|------------------------------|-------------------------|
| Patient and disease characteristics            |                              |                         |
| Age, years, mean (SD)                          | 57.74 (11.17)                | 55.67 (8.69)            |
| Female, n (%)                                  | 20 (52.6%)                   | 7 (77.8%)               |
| Disease duration, years, mean (SD)             | 8.08 (4.74)                  | 9.89 (7.25)             |
| DAS28-score, mean (SD)                         | 3.19 (1.25)                  | n.a.                    |
| Educational level                              |                              |                         |
| Low, n (%)                                     | 12 (34.3)                    | 3 (37.5)                |
| Middle, n (%)                                  | 11 (31.4)                    | 3 (37.5)                |
| High, n (%)                                    | 12 (34.3)                    | 2 (25.0)                |
| Baseline PROM-values                           |                              |                         |
| HAQ [0.00-3.00] (n=27), mean, SD, range        | 0.78 (0.61) [0.00;2.38]      | 0.98 (0.60) [0.13;1.88] |
| RADAI-5 [0.00 – 10.00] (n=24), mean, SD, range | 3.49 (2.32) [0.00;7.40]      | n.a.                    |
| RAID [0.00 – 10.00] (n=35) mean, SD, range     | 3.47 (2.28) [0.00;7.61]      | n.a.                    |

L. Renskers, S.A.A. Rongen-van Dartel, A.M.P. Huis, and P.L.C.M. van Riel

|    |                                       |            |           |
|----|---------------------------------------|------------|-----------|
| 1  |                                       |            |           |
| 2  |                                       |            |           |
| 3  | BASFI [0.00 – 10.00] (n=1), mean, SD  | n.a.       | 5.05      |
| 4  |                                       |            |           |
| 5  | BASDAI [0.00 – 10.00] (n=1), mean, SD | n.a.       | 4.60      |
| 6  |                                       |            |           |
| 7  |                                       |            |           |
| 8  | Medication use                        |            |           |
| 9  |                                       |            |           |
| 10 | csDMARD, n (%)                        | 36 (94.7%) | 8 (88.9%) |
| 11 |                                       |            |           |
| 12 | bDMARD, n (%)                         | 12 (32.0%) | 3 (33.3%) |
| 13 |                                       |            |           |
| 14 |                                       |            |           |

267 *SpA: Spondylarthropathy; HAQ: Health Assessment Questionnaire (3 = severe disability); RADAI-5: Rheumatoid Arthritis Disease Activity Index-5 (10 = severe disease activity);*  
 268 *RAID: Rheumatoid Arthritis Impact of Disease (10 = severe impact of disease activity); BASFI: Bath Ankylosing Spondylitis Functional Index (10 = severe functional limitation);*  
 269 *BASDAI: Bath Ankylosing Spondylitis Disease Activity Index (10 = severe disease activity); csDMARD: conventional synthetic Disease-Modifying Antirheumatic Drug; bDMARD:*  
 270 *biological Disease-Modifying Antirheumatic Drug*

L. Renskers, S.A.A. Rongen-van Dartel, A.M.P. Huis, and P.L.C.M. van Riel

271 *Quantitative*

272     ▪ Adherence and agreement

273 Twenty-seven patients (57.4%) were able to use the self-monitoring program without additional  
 274 training, whereas twenty patients (42.6%) attended the instruction classes. With regard to the PROM  
 275 preferences, RAID was chosen most often, namely 34 times. HAQ and RADAI-5 were chosen 27 and 23  
 276 times, respectively. Seventeen patients chose to complete one PROM, 21 patients chose to complete  
 277 two PROMs, and nine patients chose to complete three PROMs. Mean adherence to the  
 278 predetermined PROM frequency was 68.1%, see table 2. With regard to the agreement between the  
 279 DAS28 course and PROM values, RAID scored best (from 25 assessments, 17 times a score of 'good',  
 280 68.0%). RADAI-5, on the other hand, scored 'good' in ten out of seventeen assessments (58.8%), see  
 281 table 3. Figure 2 shows two examples of assessments regarding the agreement between the DAS28  
 282 course and PROM values.

283

284 Table 2. Data regarding PROM frequency, PROM scores, and adherences rates, n = 47

| Item                                                   | n (%)      |
|--------------------------------------------------------|------------|
| PROM frequency                                         |            |
| 1 week                                                 | 4 (8.5)    |
| 2 weeks                                                | 10 (21.3)  |
| 4 weeks                                                | 31 (66.0)  |
| ≥ 6 weeks                                              | 2 (4.3)    |
| Number of PROMs to complete, chosen by patient         |            |
| One                                                    | 17 (36.17) |
| Two                                                    | 21(44.68)  |
| Three                                                  | 9 (19.15)  |
| Mean adherence (%) to the predetermined PROM frequency | 68.1%      |

285 *PROM: Patient-Reported Outcome Measure; Adherence to the predefined PROM frequency: calculated by*  
 286 *dividing the number of completed PROMs by the number of PROM assessments (based on the reminder emails)*  
 287 *that should have been completed according to the chosen PROM frequency by the patient, times 100*

288



L. Renskers, S.A.A. Rongen-van Dartel, A.M.P. Huis, and P.L.C.M. van Riel

289 < Figure 2. Example of a positive (above) and negative (below) rating regarding the agreement between  
290 the PROMs and DAS28 course >

291 Table 3. Agreement (poor or good) between the DAS28 course and disease-specific PROMs (RAID and  
292 RADAI-5), assessed in n = 33 patients

| PROM    | Poor      | Good       | Total |
|---------|-----------|------------|-------|
| RAID    | 8 (32.0%) | 17 (68.0%) | 25    |
| RADAI-5 | 7 (41.2%) | 10 (58.8%) | 17    |

293 *PROM: Patient-Reported Outcome Measure; RAID: Rheumatoid Arthritis Impact of Disease; RADAI-5:*

294 *Rheumatoid Arthritis Disease Activity Index-5; DAS28 course: Disease Activity Score using 28 joint counts,*

295 *assessed by rheumatologists; Good: DAS28 course and the PROM scores showed the same direction. Poor:*

296 *DAS28 course and PROM scores showed opposite direction*

297

298 *Qualitative*

299 We conducted the focus group discussion and telephone interviews between December 2016 and June  
300 2017. The interviews lasted between 24 and 42 minutes, while the focus group discussion lasted one  
301 hour and 22 minutes. Six patients attended the focus group discussion, and four patients participated  
302 in a telephone interview (five female and five male patients).

303

304 *Patients' experiences regarding the self-monitoring program*

305 Three main themes emerged from the focus group discussion and interviews: knowledge about and  
306 insight into disease (activity), patient-professional interaction, and functionality of the program. Five  
307 subcategories emerged: Disease (self)management, discussing results with healthcare professionals,  
308 technical factors, user interface and PROMs, and patients' suggestions for improvement. Table 4  
309 provides an overview of the themes and subcategories regarding the qualitative analysis.

310

L. Renskers, S.A.A. Rongen-van Dartel, A.M.P. Huis, and P.L.C.M. van Riel

311

For peer review only

1  
2  
3  
4  
5  
6  
7  
8  
9  
10  
11  
12  
13  
14  
15  
16  
17  
18  
19  
20  
21  
22  
23  
24  
25  
26  
27  
28  
29  
30  
31  
32  
33  
34  
35  
36  
37  
38  
39  
40  
41  
42  
43  
44  
45  
46  
47  
48  
49  
50  
51  
52  
53  
54  
55  
56  
57  
58  
59  
60

L. Renskers, S.A.A. Rongen-van Dartel, A.M.P. Huis, and P.L.C.M. van Riel

312 Table 4. Themes and subcategories with regard to the qualitative analysis of patients' experiences  
313 with iMonitor

| Theme                                               | Subcategory                                                                                  |
|-----------------------------------------------------|----------------------------------------------------------------------------------------------|
| Knowledge about and insight into disease (activity) | n.a.                                                                                         |
| Patient-professional interactions                   | - Disease (self)management<br>- Discussing results with healthcare professionals             |
| Functionality of the program                        | - Technical factors<br>- User interface and PROMs<br>- Patients' suggestions for improvement |

314 *Three main themes and five subcategories emerged from the qualitative analysis. The checklist from Flottorp et*  
315 *al.<sup>28</sup> served as a guide for the establishment of the topic guide*

316

317 *Theme I: Knowledge about and insight into disease (activity)*

318 The most cited reason for using the self-monitoring program was that patients gained insight into their  
319 (long-term) disease activity course. Most patients indicated that using the program led to more  
320 knowledge and awareness about their disease. Some patients reported that they recognized peaks in  
321 disease activity earlier and could subsequently prepare for an exacerbation. Patients also mentioned  
322 that they became more prudent when noticing a flare. When asked more specifically about patients'  
323 experiences with the agreement between their PROM values and DAS28 scores, most patients thought  
324 their PROM values were in line with their DAS28. One patient noted: "By consciously using the  
325 program, it was easier to find things about rheumatism and to gain more insight into the question  
326 'What is rheumatism?'"

L. Renskers, S.A.A. Rongen-van Dartel, A.M.P. Huis, and P.L.C.M. van Riel

327 *Theme II: Patient-professional interactions*

328     ▪ Disease (self)management

329 By using the self-monitoring program, most patients felt less dependent on their HCP. Patients  
330 appreciated the fact that they were able to influence their own disease management. Overall, patients  
331 thought that the self-monitoring program could contribute to a reduction in the number of outpatient  
332 consultations.

333

334 A patient told: *"I can monitor my disease course, keep record of my disease activity in-between*  
335 *consultations, without being dependent on the professional"*

336

337     ▪ Discussing results with healthcare professionals

338 Patients emphasized the importance of discussing the results of online monitoring (e.g. PROM values)  
339 with their HCP (rheumatologist or nurse). Most of all, they wanted to know if they were 'doing it right'.  
340 Some patients expressed the value of discussing their results with their HCP. One patient provided the  
341 following scenario: *"I used to look at the back of a computer screen during an outpatient visit. Now,*  
342 *I'm looking at the computer screen together with my HCP, sharing and discussing the PROM values and*  
343 *our ideas about my treatment"*. Patients who did not discuss their values felt the need to do so in the  
344 future.

345

346 *Theme III: Functionality of the program*

347     ▪ Technical factors

348 Barriers regarding the use of the self-monitoring program were mostly related to technical aspects.  
349 Some patients had problems with the login system, which hindered them from accessing the website.  
350 Regarding the PROM reminder emails: the system generated an email alert at fixed time points (e.g.  
351 four-weekly). Some patients noticed that the system generated an alert at unfortunate time points or  
352 even no alert at all.

L. Renskers, S.A.A. Rongen-van Dartel, A.M.P. Huis, and P.L.C.M. van Riel

353       ▪ User interface and PROMs

354 Twenty-seven patients joined the instruction classes, which were perceived to be very helpful. Overall,  
355 patients were satisfied with the user interface of the program. They reviewed the layout as clear and  
356 comprehensible. Some patients experienced difficulties with the content and layout of the PROMs. For  
357 example, some patients thought the questions were not specific enough. Furthermore, the program  
358 did not use a progress bar and there was no 'Accomplish' sign after completing a PROM. As a result –  
359 in case of completing more than one PROM – some patients did not know how many PROMs they had  
360 actually completed.

362       ▪ Patients' suggestions for improvement

363 Most commonly mentioned suggestions concerned adjustments to clarify PROM values, for example  
364 a textbox to type a comment in case of an exacerbation. Additionally, patients provided suggestions  
365 concerning the possibility of also having access to their lab values in the self-monitoring program, as  
366 well as the possibility of having a more detailed look at a certain time period.

L. Renskers, S.A.A. Rongen-van Dartel, A.M.P. Huis, and P.L.C.M. van Riel

369 **Discussion**

370 This study collected experiences from patients with IRDs regarding online self-monitoring. Moreover,  
371 we assessed adherence to the predefined PROM frequency to measure disease activity and the  
372 agreement between the PROMs and the DAS28 course. The qualitative analysis revealed three themes:  
373 knowledge about and insight into disease (activity), patient-professional interaction, and functionality  
374 of the program. Overall, patients were mainly positive about the program and were willing to continue.  
375 Most of them participated for an extended period: mean follow-up duration was almost one year.  
376 Mean adherence to the predefined PROM frequency was 68.1%, and the disease-specific and patient-  
377 reported RAID showed best agreement with the DAS28 assessed by the rheumatologist. Patients  
378 reported that they gained more knowledge about their disease and felt less dependent on their HCP.  
379  
380 By self-monitoring disease activity, patients obtained a graphic overview of their PROM values over  
381 time, which gave them insight into their disease course. Patients reported that they appreciated both  
382 this long-term insight into their disease pattern, and the ability to anticipate on an exacerbation. They  
383 also indicated that they gained more knowledge about their disease, they felt better prepared for a  
384 consultation, and felt less dependent on their HCP in handling their disease. Literature about self-  
385 monitoring in diabetes already showed that knowledge about the disease and self-monitoring are  
386 related<sup>10</sup>. Although some knowledge is a prerequisite for self-monitoring, the process of self-  
387 monitoring contributes to the further expansion of disease-related knowledge. Adequate disease-  
388 related knowledge is important, since it may influence patients' decisions regarding treatment,  
389 compliance, and self-management performance,<sup>31</sup> as well as the ability to recognize signs, symptoms,  
390 and patterns,<sup>10</sup> which is supported by a study about experiences with telehealth in patients with RA.<sup>32</sup>  
391 All of these aspects are essential in shared-decision making,<sup>33</sup> while also being beneficial to the  
392 efficiency of consultations. From the perspective of the HCP, it is important to give feedback to the  
393 patients about the results of self-monitoring during outpatient consultations, a fact that was  
394 emphasized by our study participants during the interviews. Those who had not received feedback

L. Renskers, S.A.A. Rongen-van Dartel, A.M.P. Huis, and P.L.C.M. van Riel

1  
2  
3 395 about their PROM-values and/or disease activity course were less motivated to continue with the  
4  
5 396 program. The importance of feedback was emphasized in a study in which patients with early  
6  
7 397 rheumatoid arthritis received visual feedback by their HCP about their disease progression. Compared  
8  
9 398 to patients who received standard care, patients who received feedback showed significant differences  
10  
11 399 regarding disease activity parameters.<sup>34</sup> Obtaining insight into the long-term disease activity course,  
12  
13 400 and being able to anticipate on an exacerbation, might benefit the effectiveness of the delivered care  
14  
15 401 as well. Patients will be able to respond to a deterioration in a timely manner and will have a greater  
16  
17 402 chance to receive the care they need at the right time, resulting in a decrease of the cumulative disease  
18  
19 403 activity. On the other hand, fewer consultations are possible if the disease activity is stable, which will  
20  
21 404 eventually lead to less frequent outpatient visits. That reduction of health care costs can be obtained  
22  
23 405 by introducing patient-report outcomes (PROs) in the follow-up was shown by a study on tele-health  
24  
25 406 in RA. Patients received PRO-based health follow-up and were scheduled for telephone consultations  
26  
27 407 by a rheumatologist or nurse. Similar results regarding disease control were found for the telehealth  
28  
29 408 group compared with conventional follow-up.<sup>35</sup> Studies on self-monitoring in other chronic diseases  
30  
31 409 have already proven its effectiveness, such as better control of blood glucose levels in diabetes,<sup>36 37</sup>  
32  
33 410 reduction in mortality rates in heart failure,<sup>38 39</sup> reductions in blood pressure in hypertension,<sup>40 41</sup> and  
34  
35 411 reductions in thromboembolic events in patients using anticoagulation therapy.<sup>42</sup> The effectiveness of  
36  
37 412 self-monitoring resulted in a reduction in hospital readmissions in patients with hypertension, COPD  
38  
39 413 and heart failure.<sup>43</sup> Patients in our study believed that self-monitoring could lead to a reduction in  
40  
41 414 consultations, although they stressed the need and possibility for contacting the outpatient clinic when  
42  
43 415 necessary. To our knowledge, there are no studies in IRDs on the efficiency of online remote self-  
44  
45 416 monitoring of the disease activity by completing PROMs using an online program on reduction in  
46  
47 417 consultations. Further research will therefore be needed.  
48  
49  
50  
51  
52  
53  
54 418  
55  
56 419 Barriers regarding online self-monitoring were mostly related to the functionality of the online  
57  
58 420 monitoring system. Some patients experienced log-on problems, while others would like to have  
59  
60

L. Renskers, S.A.A. Rongen-van Dartel, A.M.P. Huis, and P.L.C.M. van Riel

1  
2  
3 421 access in the system to more extensive information about their health status in general (e.g. blood test  
4  
5 422 results). Despite these barriers, almost half of the participants reached the end of the study, and the  
6  
7 423 follow-up duration was almost one year. Literature in the field of technology and innovations indicates  
8  
9 424 that factors such as compatibility, complexity, and relative advantage influence the adoption of new  
10  
11 425 innovations.<sup>44</sup> Therefore, a self-monitoring program should be comprehensible and user-friendly and  
12  
13 426 preferably integrated into an existing hospital system. In addition, we recommend screening patients  
14  
15 427 on motivation and computer skills and providing guided practice. We also recommend to let patients  
16  
17 428 choose their own preferred interval and PROM(s). Forcing patients to complete PROMs at predefined  
18  
19 429 intervals set by researchers does not support our idea of self-management and might impede patients'  
20  
21 430 motivation. Some patients opted for weekly self-assessments, which might seem to be too frequent  
22  
23 431 for us as healthcare professionals. However, especially in an early or active phase of the disease, this  
24  
25 432 seems to provide some measure of support for some patients. Patients were willing and able to self-  
26  
27 433 monitor their disease. The mean adherence to the predetermined PROM frequency was reasonably  
28  
29 434 high: 68.1%. This could be partly explained by system-related factors such as the reminders, which  
30  
31 435 were considered very useful in encouraging patients to complete the questionnaire. Next to this,  
32  
33 436 patient-related factors such as intrinsic motivation might also have influenced this percentage. Since  
34  
35 437 there was no real 'need' or urgency for self-monitoring in our study, as opposed to blood glucose  
36  
37 438 monitoring in diabetes, for example, reaching complete (100%) adherence was not a realistic option.  
38  
39 439 Both the RAID and RADAI-5 had acceptable agreements with the DAS28, 68.0% and 58.8% respectively.  
40  
41 440 Due to the relatively small number of patients no conclusion can be drawn which PROM should be  
42  
43 441 used to self-monitor the disease course.  
44  
45  
46  
47  
48  
49  
50  
51

52 443 By using qualitative methods we were able to examine the experiences and barriers that influence  
53  
54 444 participation in self-monitoring programs. This resulted in a thorough description of factors related to  
55  
56 445 self-monitoring, and guidance for further development of appropriate tools. The main limitation of this  
57  
58 446 study was the selective, highly motivated study population due to the purpose sampling. Because of  
59  
60



L. Renskers, S.A.A. Rongen-van Dartel, A.M.P. Huis, and P.L.C.M. van Riel

1  
2  
3 447 the small study sample, it remains unclear which percentage of the total population will be eligible for  
4  
5 448 self-monitoring. However, the main purpose was to gather experiences about self-monitoring, which  
6  
7 449 were provided by the extensive comments of the patients. With regard to difficulties in data  
8  
9 450 interpretation in qualitative research, it remains unclear whether we actually truly grasped what  
10  
11 451 patients were really thinking or feeling. Interpretations might have been influenced by the professional  
12  
13 452 backgrounds and theoretical perspectives of the researchers. However, the coding process was done  
14  
15 453 together with a collaborator who did not have a scientific background. Another limitation is connected  
16  
17 454 to the fact that the moderator was the main care provider for some patients which might have  
18  
19 455 influenced their responses. Despite these limitations, we extensively and thoroughly discussed our  
20  
21 456 data several times in order to identify the relevant categories and emerging themes regarding self-  
22  
23 457 monitoring.

24  
25  
26 458  
27  
28 459 By monitoring their disease activity at home, patients were involved in their own disease management  
29  
30 460 and had individual control and responsibilities. During outpatient visits, patients might be better  
31  
32 461 prepared to interact with their HCP, which will improve shared-decision making, contributing to the  
33  
34 462 concept of personalized care. Self-monitoring – as a prerequisite of self-management – might benefit  
35  
36 463 the cost-effectiveness of outpatient consultations. Efficiency gains are reflected in a reduction in the  
37  
38 464 number of consultations without any increase in costs. At the same time, patient outcomes and  
39  
40 465 patients' satisfaction should either remain stable or increase. This study is a first step toward  
41  
42 466 personalized healthcare and involving the patient in decision making about their disease treatment.  
43  
44 467 Findings from our study were used to implement a self-monitoring program at our outpatient clinic  
45  
46 468 using the Integrated Electronic Patient Record from the hospital.

47  
48 469 The present study showed the potential of self-monitoring as a first step toward disease self-  
49  
50 470 management. Patients reported that they gained more knowledge, felt less dependent on their HCP,  
51  
52 471 and most of them were able to monitor their disease. Therefore, we believe that self-monitoring can  
53  
54  
55  
56  
57  
58  
59  
60

1 L. Renskers, S.A.A. Rongen-van Dartel, A.M.P. Huis, and P.L.C.M. van Riel

2  
3 472 benefit the quality and efficiency of healthcare. Further research will be needed to confirm the cost-  
4  
5 473 effectiveness of self-monitoring.  
6

7 474

9  
10 475 **Acknowledgment**

11 476 The authors would like to thank the study participants and Jolanda van Haren (the second coder). They  
12  
13  
14 477 would also like to thank Pfizer for getting the opportunity to test iMonitor.  
15

16 478

17  
18 479 **Contributors**

19  
20  
21 480 Study acquisition: PvR. Conception and design: all authors. Obtaining ethical approval: LR.

22  
23 481 Qualitative data collection: LR pretested the topic guide. Focus group discussion: PvR functioned as

24  
25 482 moderator and LR as observer. Telephone interviews were conducted by LR. Quantitative data

26  
27 483 collection: PvR and SR (mainly clinical data), whereas LR obtained data derived from the self-

28  
29 484 monitoring program. Qualitative data analysis: LR was involved as one of the coders during the coding

30  
31  
32 485 process, together with a research assistant. Provisional categorization of themes: LR and AH. Final

33  
34 486 version of the categorization of themes and categories: all authors. Quantitative data analysis: all

35  
36 487 authors. Writing: LR drafted the first version of the manuscript. PvR, AH and SR revised the manuscript.

37  
38 488 The final manuscript has been seen and approved by all authors.  
39

40  
41 489

42  
43 490 **Conflicts of interest**

44  
45 491 This study was partly funded by Pfizer (pharmaceutical company). Pfizer was able to access data

46  
47 492 available from iMonitor. Pfizer was not involved in any medical policy related to the study participants.  
48

49  
50 493

51  
52 494 **Funding**

53  
54 495 This study was partly funded by Pfizer Medical and Educational Goods and Services.  
55

56  
57 496

58  
59 497 **Ethics**  
60

L. Renskers, S.A.A. Rongen-van Dartel, A.M.P. Huis, and P.L.C.M. van Riel

498 The present study fulfills the Helsinki criteria and was approved by the Medical Ethical Committee of  
499 the Radboud University Medical Center Nijmegen approved the study (2016-2435) and concluded that  
500 no specific obligations were applicable to this research.

501

502 **Data**

503 (Anonymous) data are available upon reasonable request by contacting the corresponding author by  
504 email.

505

For peer review only

L. Renskers, S.A.A. Rongen-van Dartel, A.M.P. Huis, and P.L.C.M. van Riel

506 **References**

507

- 508 1. Crawford MJ, Rutter D, Manley C, et al. Systematic review of involving patients in the planning  
509 and development of health care. *BMJ* 2002;325(7375):1263.
- 510 2. Towle A, Bainbridge L, Godolphin W, et al. Active patient involvement in the education of  
511 health professionals. *Med Educ* 2010;44(1):64-74.
- 512 3. de Witt M, Berlo S, Aanerud G, et al. EULAR recommendations for the inclusion of patient  
513 representatives in scientific projects: A EULAR initiative. *Ann Rheum Dis* 2011;70:722-6.
- 514 4. Voshaar MJ, Nota I, van de Laar MA, et al. Patient-centred care in established rheumatoid  
515 arthritis. *Best Pract Res Clin Rheumatol* 2015;29(4-5):643-63.
- 516 5. Bodenheimer T, Lorig K, Holman H, et al. Patient self-management of chronic disease in  
517 primary care. *JAMA* 2002;288(19):2469-75.
- 518 6. Barlow J, Wright C, Sheasby J, et al. Self-management approaches for people with chronic  
519 conditions: a review. *Patient Educ Couns* 2002;48(2):177-87.
- 520 7. Kon AA. The shared decision-making continuum. *JAMA* 2010;304(8):903-04.
- 521 8. McKinstry B. Paternalism and the doctor-patient relationship in general practice. *Br J Gen Pract*  
522 1992;42(361):340-42.
- 523 9. Wilde MH, Garvin S. A concept analysis of self-monitoring. *J Adv Nurs* 2007;57(3):339-50.
- 524 10. Song M, Lipman TH. Concept analysis: Self-monitoring in type 2 diabetes mellitus. *Int J Nurs*  
525 *Stud* 2008;45(11):1700-10.
- 526 11. van Riel P, Alten R, Combe B, et al. Improving inflammatory arthritis management through  
527 tighter monitoring of patients and the use of innovative electronic tools. *RMD Open*  
528 2016;2(2):e000302.
- 529 12. Gossec L, Paternotte S, Aanerud G, et al. Finalisation and validation of the rheumatoid arthritis  
530 impact of disease score, a patient-derived composite measure of impact of rheumatoid  
531 arthritis: a EULAR initiative. *Ann Rheum Dis* 2011;70(6):935-42.

L. Renskers, S.A.A. Rongen-van Dartel, A.M.P. Huis, and P.L.C.M. van Riel

- 1  
2  
3 532 13. Salaffi F, Di Carlo M, Vojinovic J, et al. Validity of the rheumatoid arthritis impact of disease  
4  
5 533 (RAID) score and definition of cut-off points for disease activity states in a population-based  
6  
7 534 European cohort of patients with rheumatoid arthritis. *Joint Bone Spine* 2018;85(3), 317-322.  
8  
9  
10 535 14. Leeb BF, Haindl PM, Brezinschek HP, et al. RADAI-5 to monitor rheumatoid arthritis. *Clin Exp*  
11  
12 536 *Rheumatol* 2014;32(5 Suppl 85), S55-8.  
13  
14 537 15. Leeb, BF, Brezinschek, HP, Rintelen B, et al. RADAI-5 and electronic monitoring tools. *Clin Exp*  
15  
16 538 *Rheumatol* 2016;34(5), 5-10.16.  
17  
18  
19 539 16. Leeb BF, Haindl PM, Maktari A, et al. Patient-centered rheumatoid arthritis disease activity  
20  
21 540 assessment by a modified RADAI. *J Rheumatol* 2008;35(7):1294-9.  
22  
23 541 17. Welsing PMJ, Landewe RBM, van Riel PLCM, et al. The relationship between disease activity  
24  
25 542 and radiologic progression in patients with rheumatoid arthritis - A longitudinal analysis.  
26  
27 543 *Arthritis Rheum* 2004;50(7):2082-93. doi: 10.1002/art.20350  
28  
29  
30 544 18. Taal E, Riemsma RP, Brus HL, et al. Group education for patients with rheumatoid arthritis.  
31  
32 545 *Patient Educ Couns* 1993;20(2-3):177-87.  
33  
34  
35 546 19. Prevoo M, van 't Hof MA, Kuper H, et al. Modified disease activity scores that include  
36  
37 547 twenty-eight-joint counts development and validation in a prospective longitudinal study of  
38  
39 548 patients with rheumatoid arthritis. *Arthritis Rheum* 1995;38(1):44-8.  
40  
41 549 20. Smolen JS, Breedveld FC, Burmester GR, et al. Treating rheumatoid arthritis to target: 2014  
42  
43 550 update of the recommendations of an international task force. *Ann Rheum Dis* 2016;75(1):3-  
44  
45 551 15.  
46  
47  
48 552 21. Arnold E, Arnold W, Conaway D, et al. Physician Visits Create a Bottleneck in RA Management:  
49  
50 553 The Rheumatologist; 2015 [Available from: [https://www.the-](https://www.the-rheumatologist.org/article/rheumatoid-arthritis-practice-performance-project-spots-problems-in-ra-management/)  
51  
52 554 [rheumatologist.org/article/rheumatoid-arthritis-practice-performance-project-spots-](https://www.the-rheumatologist.org/article/rheumatoid-arthritis-practice-performance-project-spots-problems-in-ra-management/)  
53  
54 555 [problems-in-ra-management/](https://www.the-rheumatologist.org/article/rheumatoid-arthritis-practice-performance-project-spots-problems-in-ra-management/)] accessed 25 February 2019.  
55  
56  
57 556 22. Jain VK, Negi VS. Inflammatory rheumatic diseases in the elderly. *Indian J Rheumatol*  
58  
59 557 2016;11(4):207.  
60

L. Renskers, S.A.A. Rongen-van Dartel, A.M.P. Huis, and P.L.C.M. van Riel

- 1  
2  
3 558 23. Hendrikx J, Fransen J, van Riel PL. Monitoring rheumatoid arthritis using an algorithm based  
4  
5 559 on patient-reported outcome measures: a first step towards personalised healthcare. RMD  
6  
7 560 Open 2015;1(1):e000114.
- 8  
9  
10 561 24. El Miedany Y. PROMs in inflammatory arthritis: moving from static to dynamic. Clin Rheumatol  
11  
12 562 2013;32(6):735-42. doi: 10.1007/s10067-013-2228-0.
- 13  
14 563 25. Calvert M, Kyte D, Price G, et al. Maximising the impact of patient reported outcome  
15  
16 564 assessment for patients and society. BMJ 2019;364:k5267.
- 17  
18  
19 565 26. Aletaha D, Neogi T, Silman AJ, et al. 2010 rheumatoid arthritis classification criteria: an  
20  
21 566 American College of Rheumatology/European League Against Rheumatism collaborative  
22  
23 567 initiative. Arthritis Rheum 2010;62(9):2569-81.
- 24  
25 568 27. Kelyon. What is iMonitor? 2018 [Available from:  
26  
27 569 <http://www.kelyon.com/en/project/imonitor>] accessed 11<sup>th</sup> July 2019.
- 28  
29  
30 570 28. Flottorp SA, Oxman AD, Krause J, et al. A checklist for identifying determinants of practice: a  
31  
32 571 systematic review and synthesis of frameworks and taxonomies of factors that prevent or  
33  
34 572 enable improvements in healthcare professional practice. Implement Sci 2013;8(1):35.
- 35  
36  
37 573 29. Pope C, Ziebland S, Mays N. Qualitative research in health care: analysing qualitative data. BMJ  
38  
39 574 2000;320(7227):114.
- 40  
41 575 30. Tong A, Sainsbury P, Craig J. Consolidated criteria for reporting qualitative research (COREQ):  
42  
43 576 a 32-item checklist for interviews and focus groups. Int J Qual Health Care 2007;19(6):349-357.
- 44  
45  
46 577 31. Barlow J, Wright C. Knowledge in patients with rheumatoid arthritis: a longer term follow-up  
47  
48 578 of a randomized controlled study of patient education leaflets. Br J Rheumatol 1998;37(4):373-  
49  
50 579 76.
- 51  
52 580 32. Knudsen LR, De Thurah A, Lomborg K. Experiences With Telehealth Followup in Patients With  
53  
54 581 Rheumatoid Arthritis: A Qualitative Interview Study. Arthritis Care Res (Hoboken)  
55  
56 582 2018;70(9):1366-72.
- 57  
58  
59  
60

L. Renskers, S.A.A. Rongen-van Dartel, A.M.P. Huis, and P.L.C.M. van Riel

- 1  
2  
3 583 33. Joseph-Williams N, Elwyn G, Edwards A. Knowledge is not power for patients: a systematic  
4  
5 584 review and thematic synthesis of patient-reported barriers and facilitators to shared decision  
6  
7 585 making. *Patient Educ Couns* 2014;94(3):291-309.
- 8  
9  
10 586 34. El Miedany Y, El Gaafary M, Palmer D. Assessment of the utility of visual feedback in the  
11  
12 587 treatment of early rheumatoid arthritis patients: a pilot study. *Rheumatol Int*  
13  
14 588 2012;32(10):3061-68.
- 15  
16 589 35. De Thurah A, Stengaard-Pedersen K, Axelsen M, et al. Tele-Health Followup Strategy for Tight  
17  
18 590 Control of Disease Activity in Rheumatoid Arthritis: Results of a Randomized Controlled Trial.  
19  
20 591 *Arthritis Care Res (Hoboken)* 2018;70(3):353-60.
- 21  
22  
23 592 36. Poolsup N, Suksomboon N, Rattanasookchit S. Meta-analysis of the benefits of self-monitoring  
24  
25 593 of blood glucose on glycemic control in type 2 diabetes patients: an update. *Diabetes Technol*  
26  
27 594 *Ther* 2009;11(12):775-84.
- 28  
29  
30 595 37. Hunt CW. Technology and diabetes self-management: an integrative review. *World J Diabetes*  
31  
32 596 2015;6(2):225.
- 33  
34 597 38. Nakamura N, Koga T, Iseki H. A meta-analysis of remote patient monitoring for chronic heart  
35  
36 598 failure patients. *J Telemed Telecare* 2014;20(1):11-17.
- 37  
38  
39 599 39. Conway A, Inglis SC, Clark RA. Effective technologies for noninvasive remote monitoring in  
40  
41 600 heart failure. *Telemed J E Health* 2014;20(6):531-38.
- 42  
43 601 40. Bray EP, Holder R, Mant J, et al. Does self-monitoring reduce blood pressure? Meta-analysis  
44  
45 602 with meta-regression of randomized controlled trials. *Ann Med* 2010;42(5):371-86.
- 46  
47  
48 603 41. Uhlig K, Patel K, Ip S, et al. Self-measured blood pressure monitoring in the management of  
49  
50 604 hypertension: a systematic review and meta-analysis. *Ann Intern Med* 2013;159(3):185-94.
- 51  
52 605 42. Heneghan C, Ward A, Perera R, et al. Self-monitoring of oral anticoagulation: systematic review  
53  
54 606 and meta-analysis of individual patient data. *Lancet* 2012;379(9813):322-34.
- 55  
56  
57 607 43. McBain H, Shipley M, Newman S. The impact of self-monitoring in chronic illness on healthcare  
58  
59 608 utilisation: a systematic review of reviews. *BMC Health Serv Res* 2015;15(1):565.
- 60

L. Renskers, S.A.A. Rongen-van Dartel, A.M.P. Huis, and P.L.C.M. van Riel

609 44. Rogers EM. Diffusion of innovations: Simon and Schuster 2010.

610

611

For peer review only



L. Renskers, S.A.A. Rongen-van Dartel, A.M.P. Huis, and P.L.C.M. van Riel

612 **Figure legends**

613 **Figure 1:**

614 *Y-axis: 47 patients who participated in the self-monitoring program, each line represents a patient; X-axis: days*  
615 *since start of study (different start days possible for patients)*

616

617 **Figure 2:**

618 *DAS28: Disease Activity Score 28; PROM: Patient-Reported Outcome Measure; RADAI-5: Rheumatoid Arthritis*  
619 *Disease Activity Index-5; RAID: Rheumatoid Arthritis Impact of Disease.*

620 *Above: good congruence between PROM-values and DAS28-scores. Below: poor congruence between PROM-*  
621 *values and DAS28-scores*

622 *Poor: DAS28 course and PROM scores show opposite direction; Good: DAS28 course and the PROM scores show*  
623 *the same direction*

Figure 1. Follow-up duration in days of the 47 iMonitor participants



Y-axis: 47 patients who participated in the self-monitoring program, each line represents a patient; X-axis: days since start of study (different start days possible for patients)

Figure 2. Example of a positive (above) and negative (below) rating regarding the agreement between the PROMs and DAS28 course

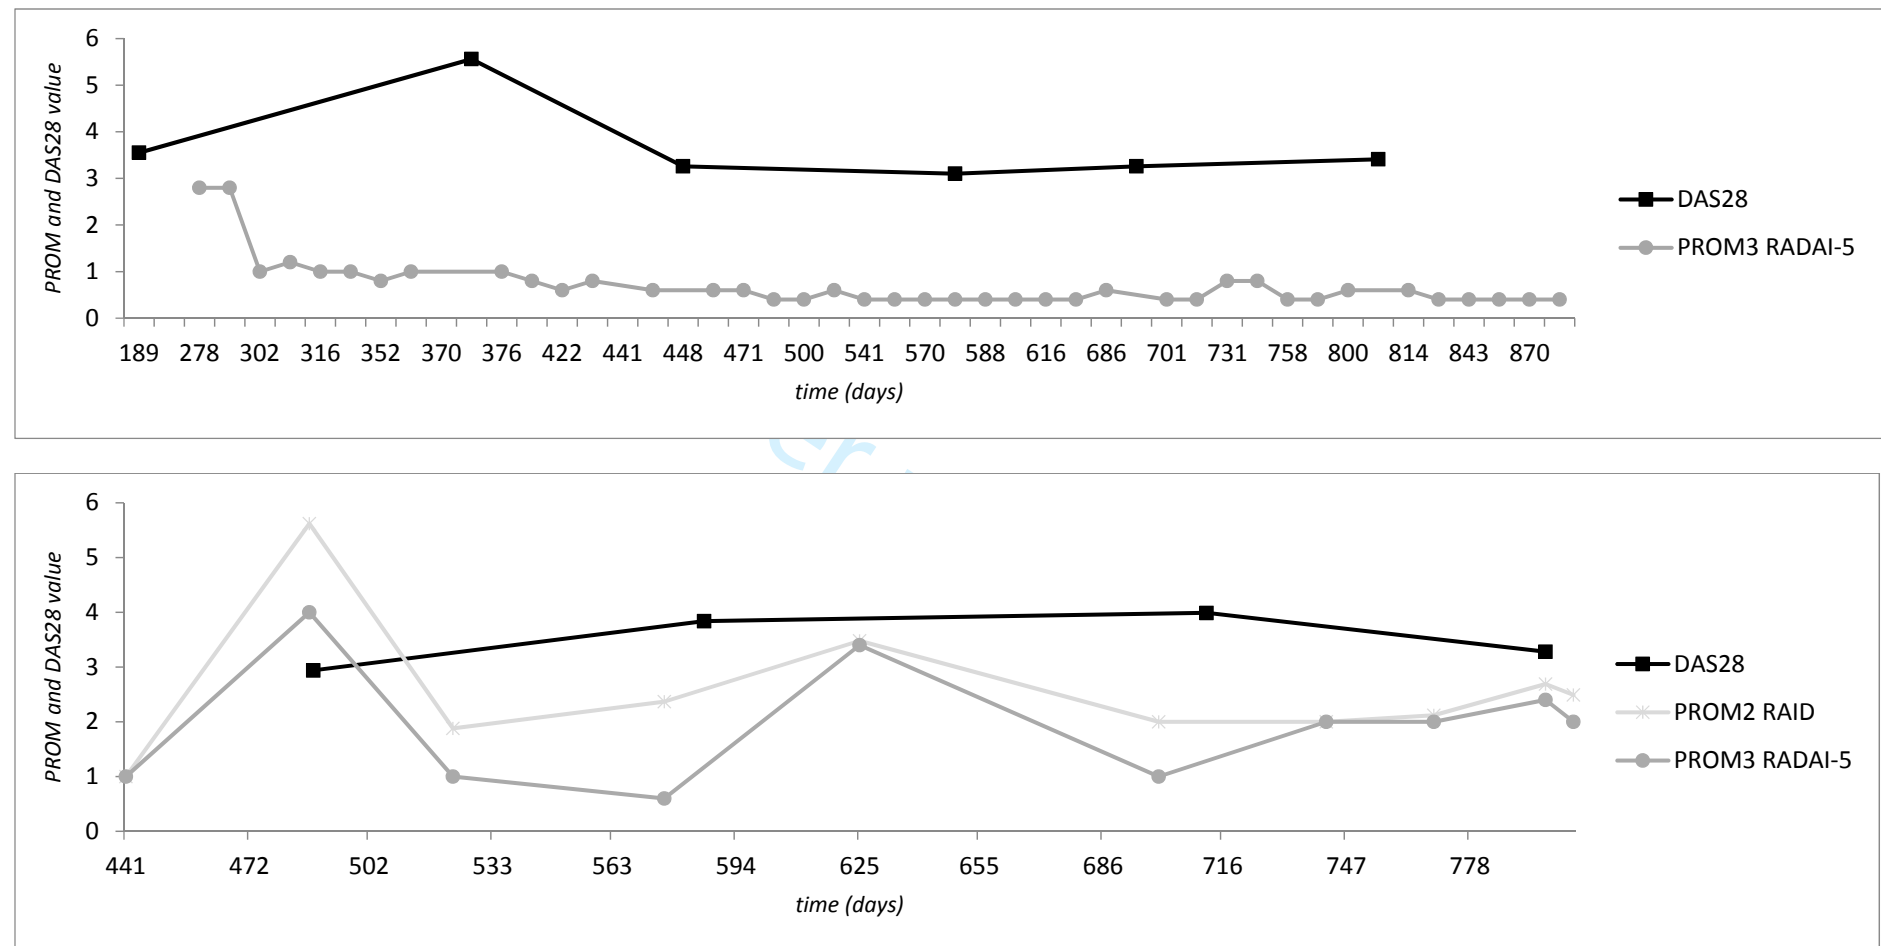

DAS28: Disease Activity Score 28; PROM: Patient-Reported Outcome Measure; RADAI-5: Rheumatoid Arthritis Disease Activity Index-5; RAID: Rheumatoid Arthritis Impact of Disease.

Above: good congruence between PROM-values and DAS28-scores. Below: poor congruence between PROM-values and DAS28-scores

Poor: DAS28 course and PROM scores show opposite direction; Good: DAS28 course and the PROM scores show the same direction

## Appendix

Topic guide: "Patients' experiences regarding online self-monitoring of the disease course"

### Guideline related factors

1. Which elements of the program are useful in your opinion, and why? Which are not useful, and why?
2. On what devices are you using the program?
3. What are your experiences with using iMonitor on these devices?
4. What do you think about the lay-out of iMonitor?
5. What do you think about the lay-out of de questionnaires/PROMs?
6. Do you encounter any technical problems while using iMonitor? If yes, which problems have occurred?
7. How did you experience creating a password?

### Patient related factors

#### Motivation

8. For what specific reasons do you use the program?
9. What do you think are the benefits of using iMonitor?
10. Are there any reasons why you should not use the program?

#### Needs

11. To what specific needs does iMonitor comply?

#### Skills

12. Which skills are needed to use iMonitor properly according to you?
13. Do you have those skills?

#### Self-efficacy

14. Do you think you are capable to use iMonitor correctly? Why?

#### Adherence

You received an email-alert in case a PROM/PROMs could be completed.

15. What are your experiences with receiving those alerts?
16. What do you think about the idea of receiving alerts?
17. To what extent do these email-alerts activate you to complete the PROM/PROMs?

1  
2  
3  
4  
5 Social support

6 18. Are you supported by others (family, friends, peers) regarding the use of iMonitor?

7  
8 If yes: who and to what extent?

9  
10 19. Do you talk with others about iMonitor? If yes, who?

11  
12 20. How do you feel about receiving that social support?

13  
14  
15 Professional interaction

16 21. Do you/did you discuss the use of iMonitor with your rheumatologist or nurse specialist?

17  
18 22. If yes, how do you/did you feel about that?

19  
20 23. In case you attended the instruction class: What is your opinion about this instruction class?

21  
22  
23 Incentives and resources

24  
25 Incentives/stimuli

26 24. In case you kept using the program: what made you keep using the program?

27  
28 25. Which additional value do you experience by using iMonitor?

1  
2  
3 Knowledge

4  
5 26. Do you gain more knowledge by using the program?

- 6  
7 a. If yes, how and to what extent?  
8  
9 b. If no, why not?

10  
11  
12 Time investment

13  
14 27. What do you think about the time investment needed in order to use iMonitor?

15  
16  
17 Capacity for organizational change

18  
19 28. Do you think that using iMonitor could contribute to a reduction in the number of outpatient  
20 consultations, and why? Or why not?

21  
22 29. Do you have any recommendations in order to recruit more patients?

23  
24  
25 Social, political and legal factors

26  
27 30. How do you think about the privacy standards regarding the use of iMonitor?

28  
29 31. Have there been any issues you needed to solve?

30  
31  
32 Any additional information you want to share with us? Any comments or suggestions?  
33  
34  
35  
36  
37  
38  
39  
40  
41  
42  
43  
44  
45  
46  
47  
48  
49  
50  
51  
52  
53  
54  
55  
56  
57  
58  
59  
60
