# Supplementary material for: Patients’ experiences regarding self-monitoring of the disease course: an observational pilot study in patients with inflammatory rheumatic diseases at a rheumatology outpatient clinic in The Netherlands
Source: PubMed Central journal article supplement — BMJ Open. 2020 Aug 20;10(8):e033321. doi: 10.1136/bmjopen-2019-033321 (PMC7440711; doi:10.1136/bmjopen-2019-033321), 2020-08-20
Supplement: bmjopen-2019-033321supp001.pdf [file bmjopen-2019-033321supp001.pdf]

## Appendix

Topic guide: "Patients' experiences regarding online self-monitoring of the disease course"

### Guideline related factors

1. Which elements of the program are useful in your opinion, and why? Which are not useful, and why?
2. On what devices are you using the program?
3. What are your experiences with using iMonitor on these devices?
4. What do you think about the lay-out of iMonitor?
5. What do you think about the lay-out of de questionnaires/PROMs?
6. Do you encounter any technical problems while using iMonitor? If yes, which problems have occurred?
7. How did you experience creating a password?

### Patient related factors

#### Motivation

8. For what specific reasons do you use the program?
9. What do you think are the benefits of using iMonitor?
10. Are there any reasons why you should not use the program?

#### Needs

11. To what specific needs does iMonitor comply?

#### Skills

12. Which skills are needed to use iMonitor properly according to you?
13. Do you have those skills?

#### Self-efficacy

14. Do you think you are capable to use iMonitor correctly? Why?

#### Adherence

You received an email-alert in case a PROM/PROMs could be completed.

15. What are your experiences with receiving those alerts?
16. What do you think about the idea of receiving alerts?
17. To what extent do these email-alerts activate you to complete the PROM/PROMs?

### Social support

18. Are you supported by others (family, friends, peers) regarding the use of iMonitor?  
If yes: who and to what extent?
19. Do you talk with others about iMonitor? If yes, who?
20. How do you feel about receiving that social support?

### Professional interaction

21. Do you/did you discuss the use of iMonitor with your rheumatologist or nurse specialist?
22. If yes, how do you/did you feel about that?
23. In case you attended the instruction class: What is your opinion about this instruction class?

### Incentives and resources

#### Incentives/stimuli

24. In case you kept using the program: what made you keep using the program?
25. Which additional value do you experience by using iMonitor?

#### Knowledge

26. Do you gain more knowledge by using the program?
- If yes, how and to what extent?
  - If no, why not?

#### Time investment

27. What do you think about the time investment needed in order to use iMonitor?

#### Capacity for organizational change

28. Do you think that using iMonitor could contribute to a reduction in the number of outpatient consultations, and why? Or why not?
29. Do you have any recommendations in order to recruit more patients?

#### Social, political and legal factors

30. How do you think about the privacy standards regarding the use of iMonitor?
31. Have there been any issues you needed to solve?

Any additional information you want to share with us? Any comments or suggestions?
